# Supplementary material for: Electronic Cigarette and Traditional Cigarette Use among Middle and High School Students in Florida, 2011–2014
Source: PLoS One. 2015 May 13;10(5):e0124385. doi: 10.1371/journal.pone.0124385 (PMC4430226; doi:10.1371/journal.pone.0124385)
Supplement: S1 File — (XLSX) [file pone.0124385.s001.xlsx]

## Sheet: Data
q93a	q93b	q93c	q93d	q93e	tbco_hh	ecig_hh	year	statewt	psu	schlvl	ever_ecig	ecigrt	d1	d2	d3	d4	d12	c1	c4
2	2	2	2	2	0	0	2014	20.267	420701	2	0	0	15	1	5	5	2	2	1
2	2	2	2	2	0	0	2014	20.267	420701	2	0	0	16	1	5	5	2	2	1
							2014	17.1776	420701	2		0	16	1	5		1	1	6
2	2	1	2	2	1	0	2014	20.267	420701	2	0	0	15	1	5	5	2	2	1
2	2	2	2	2	0	0	2014	17.1776	420701	2	0	0	16	1	5	3	1	2	1
2	2	2	2	2	0	0	2014	17.1776	420701	2	0	0	15	1	5	5	1	2	1
2	2	2	2	2	0	0	2014	17.1776	420701	2	0	0	16	1	5	6	1	2	1
2	2	2	2	2	0	0	2014	5.22888	400011	2	0	0	16	2	6	3	2	2	1
1	1	2	2	1	1	0	2014	3.38703	400011	2	0	0	17	1	6	5	2	1	7
2	2	2	2	2	0	0	2014	3.67279	400011	2	1	1	17	2	6	5	2	1	2
2	2	2	2	2	0	0	2014	3.67279	400011	2	1	1	16	2	6	5	2	1	1
2	2	2	2	2	0	0	2014	4.82206	400011	2	0	0	16	1	6	3	2	2	1
2	2	2	2	2	0	0	2014	5.22888	400011	2	0	0	17	2	6	3	2	2	1
2	2	2	2	2	0	0	2014	5.38541	400011	2	1	1	18	2	7	6	2	1	3
1	2	2	1	2	1	1	2014	3.67279	400011	2	0	0	17	2	6	5	2	2	1
2	2	2	2	2	0	0	2014	3.06393	400011	2	0	0	17	2	6		1	2	1
2	2	2	2	2	0	0	2014	7.66711	400011	2	0	0	19	2	7	3	2	2	1
1	2	1	2	1	1	0	2014	5.38541	400011	2	1	0	19	2	7	5	2	1	2
2	2	2	2	2	0	0	2014	7.07059	400011	2	0	0	17	1	7	3	2	2	1
2	2	2	2	2	0	0	2014	5.38541	400011	2	1	1	20	2	7	5	2	1	7
2	2	2	1	2	1	1	2014	3.38703	400011	2	1	1	18	1	6	5	2	1	1
2	2	2	2	2	0	0	2014	3.13015	400011	2	0	0	15	1	4	5	2	2	1
1	1	1	2	2	1	0	2014	4.45633	400011	2	0	0	15	1	4	3	2	1	1
							2014	3.67279	400011	2	1	1	17	2	6	5	2	1	4
2	2	2	2	2	0	0	2014	3.39423	400011	2	0	0	16	2	4	5	2	2	1
2	2	2	2	2	0	0	2014	4.8323	400011	2	0	0	16	2	4	3	2	2	1
2	2	2	2	2	0	0	2014	29.3016	100551	2	0	0	15		5	5	2	2
2	2	2	2	2	0	0	2014	6.80713	102711	2	0	0	16	1	5	6	1	2	1
2	2	2	2	2	0	0	2014	9.19062	102711	2	0	0	16	1	5	5	2	2	1
							2014	5.93774	104211	2	0	1	14		4	1	1	2	1
2	2	2	2	2	0	0	2014	27.055	510073	2	0	0	15	1	4	5	2	2	1
2	2	2	2	2	0	0	2014	27.055	510073	2	0	0	15		4	5	2	2	1
2	2	2	2	2	0	0	2014	30.3687	510073	2	0	0	15	2	4	5	2	2	1
1	2	1	1	2	1	1	2014	30.3687	510073	2	0	0	15	2	4	5	2	2	1
2	2	2	2	2	0	0	2014	25.1414	510073	2	0	0	15	1	4	6	1	2	1
2	2	2	2	2	0	0	2014	32.8305	510073	2	0	0	15	2	4	3	2	2	1
2	1	2	2	2	1	0	2014	27.055	510073	2	0	0	15	1	4	5	2	2	1
2	2	2	2	2	0	0	2014	9.2204	102711	2	0	0	16	2	5	5	2	2	1
2	2	2	2	2	0	0	2014	9.19062	102711	2	0	0	16	1	5	5	2	2	1
1	1	1	1	1	1	1	2014	21.8713	350161	2	0	0	16	2	6	6	2	1	3
2	2	2	2	2	0	0	2014	15.666	350161	2	0	0	16	2	5	6	1	2	1
2	2	2	2	2	0	0	2014	14.5844	350161	2	0	0	15	1	4	3	2	2	1
1	2	2	2	2	1	0	2014	20.367	350161	2	0	0	16	1	6	5	2	2	1
1	1	2	1	1	1	1	2014	15.1743	420701	2	0	0	16	2	4	6	1	2	1
2	2	2	2	2	0	0	2014	15.1743	420701	2	0	0	15	2	4	5	1	2	1
2	2	2	2	2	0	0	2014	20.9697	420701	2	0	0	15	1	4	3	2	2	1
2	2	2	2	2	0	0	2014	24.8935	420701	2	0	0	16	2	6	3	2	2	1
2	2	2	2	2	0	0	2014	20.9697	420701	2	0	0	14	1	4	3	2	2	1
1	1	2	2	1	1	0	2014	18.5383	420701	2	0	0	14	1	4	5	2	2	1
2	2	2	2	2	0	0	2014	18.5383	420701	2	0	0	15	1	4	5	2	2	1
2	2	2	2	2	0	0	2014	22.0071	420701	2	1	0	16	2	6	5	2	1	2
2	2	2	2	2	0	0	2014	17.9034	420701	2	0	0	14	2	4	2	2	2	1
2	2	2	2	2	0	0	2014	41.459	420701	2	0	0	18	2	7	6	1	2	1
2	2	2	2	2	0	0	2014	19.5729	420701	2	0	0	16	2	5	5	2	2	1
2	2	2	2	2	0	0	2014	15.1743	420701	2	0	0	14	2	4	6	1	1	1
1	1	2	2	1	1	0	2014	18.5383	420701	2	1	1	15	1	4	6	2	2	1
2	2	2	2	2	0	0	2014	17.9034	420701	2	0	0	14	2	4	2	2	2	1
2	2	2	2	2	0	0	2014	20.267	420701	2	0	0	16	1	5	5	2	2	1
1	2	1	1	2	1	1	2014	17.9034	420701	2	1	0	15	2	4	5	2	1	2
1		1			1		2014	18.5383	420701	2	0	0	15	1	4	5	2	1	1
2	2	2	2	2	0	0	2014	19.5729	420701	2	0	0	16	2	5	5	2	2	1
1	2	2	2	2	1	0	2014	17.1776	420701	2	0	0	15	1	5	6	1	2	1
2	2	2	2	2	0	0	2014	16.5893	420701	2	0	0	16	2	5	3	1	2	1
2	2	2	2	2	0	0	2014	24.8935	420701	2	0	0	17	2	6	3	2	1	1
2	2	2	2	2	0	0	2014	17.9034	420701	2	0	0	15	2	4	1	2	2	1
2	2	2	2	2	0	0	2014	48.9154	420701	2	0	0	17	2	7	2	2	2	1
2	2	2	2	2	0	0	2014	22.0071	420701	2	0	0	16	2	6	5	2	2	1
2	2	2	2	2	0	0	2014	41.459	420701	2	0	0	18	2	7	6	1	2	1
2	2	2		2			2014	30.3687	510073	2	0	0	15	2	4	5		2	1
2	2	2	2	2	0	0	2014	30.3687	510073	2	0	0	15	2	4	5	2	2	1
							2014	30.3687	510073	2	0	0	15	2	4	5	2	2	1
2	2	2	2	1	1	0	2014	30.3687	510073	2	1	1	14	2	4	6	2	2	1
2	1	2	1	1	1	1	2014	27.055	510073	2	1	1	15	1	4	5	2	1	1
2	2	2	2	2	0	0	2014	27.055	510073	2			15	1	4	5	2	2	1
2	2	2	2	2	0	0	2014	27.055	510073	2	0	0	14	1	4	5	2	2	1
1	2	2	1	1	1	1	2014	30.3687	510073	2			16	2	4	5	2	2	1
2	1	2	2	2	1	0	2014	13.3139	102711	2			16	1	5	3	2	2	1
1	2	2	2	2	1	0	2014	9.90875	102711	2	1	0	18	1	6	5	2	1	7
							2014	11.6135	102711	2			15	1	4	3	2	2	1
2	2	2	2	2	0	0	2014	9.19062	102711	2	0	0	15	1	5	5	2	2	1
2	2	2	2	2	0	0	2014	13.3571	102711	2	0	0	15	2	5	3	2	2	1
2	2	2	2	2	0	0	2014	13.3139	104111	2	0	0	16	1	5	3	2	2	1
1	1	2	2	2	1	0	2014	13.3139	104111	2	0	0	16	1	5	3	2	2	1
2	2	1	2	2	1	0	2014	22.0071	420701	2	0	0	16	2	6	5	2	2	1
2	2	2	2	2	0	0	2014	14.5844	350161	2	0	0	15	1	4	3	2	2	1
							2014	13.0193	350161	2	0	0	16	2	4	6	1	2	1
2	2	2	2	2	0	0	2014	20.2847	350161	2	0	0	17	2	6	6	1	2	1
1	2	2	2	2	1	0	2014	14.0375	350161	2	0	0	14	2	4	5	2	2	1
2	2	2	2	2	0	0	2014	16.8913	350161	2	0	0	15	2	5	5	2	1	1
2	2	2	2	2	0	0	2014	12.1238	350161	2	0	0	15	1	4	6	1	2	1
1	2	2	2	2	1	0	2014	14.0375	350161	2	0	0	15	2	4	5	2	2	1
2	1	2	2	2	1	0	2014	14.5844	350161	2	0	0	15	1	4	3	2	1	1
							2014	20.367	350161	2	0	0	16	1	6	5	2	2	1
2	2	2	2	2	0	0	2014	14.0375	350161	2	0	0	15	2	4	5	2	2	1
2	1	1	1	1	1	1	2014	20.8038	350161	2	1	0	18	1	7	3	2	1	5
1	1	1	1		1	1	2014	21.8713	350161	2	1	1	18	2	6	1	2	1	4
2	1	2	2	2	1	0	2014	17.294	350161	2	0	1	18	1	7	4	1	1	5
1	2	2	2	2	1	0	2014	13.0721	350161	2	1	0	14	1	4	5	2	1	1
2	2	1	1	2	1	1	2014	15.6615	350161	2	0	0	15	2	4	3	2	2	4
							2014	18.6466	350161	2		0	19	1	7	5	2	1	7
2	2	2	1	2	1	1	2014	18.6466	350161	2	0	0	18	1	7	5	2	1	7
2	2	2	2	2	0	0	2014	20.0237	350161	2	0	0	18	2	7	5	2	1	3
2	2	2	2	2	0	0	2014	20.0237	350161	2	0	0	19	2	7	5	2	2	1
2	2	2	2	2	0	0	2014	20.0237	350161	2	0	0	18	2	7	5	2	1	1
1	2	2	2	2	1	0	2014	20.8038	350161	2	0	0	18	1	7	3	2	1	1
2	2	2	2	2	0	0	2014	18.8454	350161	2	1	1	16	2	5	3	2	1	1
2	2	2	2	2	0	0	2014	20.0237	350161	2	0	0	18	2	7	5	2	1	1
2	2	2	2	2	0	0	2014	22.3402	350161	2	0	0	18	2	7	3	2	2	1
2	2	2	2	2	0	0	2014	20.8038	350161	2	0	0	17	1	7	3	2	2	1
1	2	2	2	2	1	0	2014	15.7296	350161	2	1	0	15	1	5	5	2	1	1
1	2	2	2		1	0	2014	14.0375	350161	2	0	0	15	2	4	5	2	2	1
2	2	2	2	2	0	0	2014	20.2847	350161	2	0	0	17	2	6	6	1	2	1
2	1	2	2	2	1	0	2014	22.7232	350161	2	0	0	18	1	6	3	2	1	1
1	2	2	2	2	1	0	2014	14.5886	350161	2	1	1	17		5	6	1	1	6
2	2	2	2	1	1	0	2014	12.1238	350161	2			15	1	4	6	1	2	1
2	2	2	2	2	0	0	2014	21.8713	350161	2	0	0	16	2	6	5	2	2	1
1	2	2	2	2	1	0	2014	20.367	350161	2	0	0	16	1	6	6	2	2	1
2	2	2	2	2	0	0	2014	22.7232	350161	2	0	0	17	1	6	3	2	2	1
2	2	2	2	2	0	0	2014	18.6466	350161	2	0	0	18	1	7	5	2	1	1
1	2	2	2	2	1	0	2014	20.0237	350161	2	0	0	17	2	7	5	2	2	1
1	2	2	2	2	1	0	2014	21.8713	350161	2	0	0	16	2	6	5	2	1	1
2	2	1	2	2	1	0	2014	20.367	350161	2	0	0	16	1	6	5	2	2	1
2	2	2	2	2	0	0	2014	17.294	350161	2	0	0	19		7	4	1	1	1
1	2	2	1	2	1	1	2014	20.0237	350161	2	1	1	19	2	7	5	2	1	6
1	1	2	1	2	1	1	2014	18.6466	350161	2	0	0	18	1	7	5	2	1	2
2	2	2	2	2	0	0	2014	20.0237	350161	2	0	0	19	2	7	5	2	2	1
1	2	1	1	2	1	1	2014	18.6466	350161	2	0	0	17	1	7	5	2	1	1
2	2	2	2	2	0	0	2014	20.0237	350161	2	0	0	19	2	7	5	2	1	1
1	2	2	2	2	1	0	2014	21.8713	350161	2	0	0	17	2	6	6	2	2	1
2	2	2	2	2	0	0	2014	2.30394	230061	2	0	0	15	1	5	5	2	2	1
1	2	2	2	2	1	0	2014	2.30394	230061	2	0	0	16	1	5	5	2	2	1
2	2	2	2	2	0	0	2014	2.30394	230061	2	1	0	16	1	5	5	2	1	1
1	2	2	2	2	1	0	2014	1.16387	230061	2	1	0	15	1	5	6	1	1	2
1	2	2	1	2	1	1	2014	2.30394	230061	2	0	0	15	1	5	5	2	1	2
2	2	2	2	2	0	0	2014	2.30394	230061	2	1	0	15	1	5	5	2	1	2
2	2	2	2	2	0	0	2014	1.16387	230061	2	0	0	16	1	5	6	1	2	1
2	2	2	2	2	0	0	2014	2.57191	230061	2	0	0	15	2	5	3	2	2	1
1	2	2	2	2	1	0	2014	2.30394	230061	2	1	0	16	1	5	5	2	1	2
1	2	2	2	2	1	0	2014	2.46015	230061	2	0	0	16	1	5	3	2	2	1
2	2	2	2	2	0	0	2014	2.57191	230061	2	0	0	15	2	5	3	2	2	1
2	2	2	2	2	0	0	2014	2.28813	230061	2	1	1	17	1	6	3	2	1	3
2	2	2	2	2	0	0	2014	3.073	230061	2	0	0	17	1	7	5	2	2	1
2	2	2	2	2	0	0	2014	3.073	230061	2	0	0	17	1	7	1	2	2	1
2	2	2	2	2	0	0	2014	2.14283	230061	2	0	0	16	1	6	5	2	1	1
2	2	1	2	2	1	0	2014	2.24017	230061	2	1	1	17	2	6	5	2	1	1
2	2	2	2	2	0	0	2014	3.28136	230061	2	0	0	17	1	7	3	2	2	1
2	2	1	2	2	1	0	2014	3.21259	230061	2	0	0	18	2	7	5	2	2	1
2	2	2	2	2	0	0	2014	3.43042	230061	2	0	0	18	2	7	3	2	1	1
							2014	1.16387	230061	2	1	0	15	1	5		1	2	1
1	2	2	2	2	1	0	2014	2.30394	230061	2	0	0	15	1	5	5	2	1	1
2	2	1	2	2	1	0	2014	2.30394	230061	2	0	0	15	1	5	5	2	2	1
2	2	2	1	2	1	1	2014	2.30394	230061	2	1	1	15	1	5	5	2	1	4
1	2	2	2	2	1	0	2014	2.57191	230061	2	0	0	16	2	5	3	2	2	1
2	2	2	2	2	0	0	2014	2.57191	230061	2	0	0	16	2	5	3	2	2	1
1	1	1	1	1	1	1	2014	1.17115	230061	2	1	1	21	2	1	6	1	1	7
1	2	2	2	2	1	0	2014	2.4086	230061	2		0	15	2	5	5	2	2	1
2	2	2	2	2	0	0	2014	2.14283	230061	2	0	0	16	1	6	5	2	2	1
2	2	2	2	2	0	0	2014	2.39207	230061	2	0	0	17	2	6	3	2	2	1
2	2	2	2	2	0	0	2014	2.14283	230061	2		0	17	1	6	5	2	2	1
1	2	2	2	2	1	0	2014	2.24017	230061	2	0	0	16	2	6	5	2	2	1
1					1		2014	2.24017	230061	2	1	1	17	2	6	5	2	1	6
2	2	1	2	2	1	0	2014	2.24017	230061	2	0	0	18	2	6	5	2	2	1
2	2	1	2	2	1	0	2014	2.24017	230061	2	0	0	17	2	6	5	2	2	1
2	2	1	2	2	1	0	2014	2.24017	230061	2	0	0	17	2	6	5	2	2	1
1	2	2	1	2	1	1	2014	2.24017	230061	2	1	1	16	2	6	5	2	1	1
1	1	1	1	1	1	1	2014	1.17115	230061	2	0	0	21	2	1	6	1	1	7
2	2	2	1	2	1	1	2014	2.19776	230061	2	0	0	15	2	4	5	2	1	7
2	2	2	2	2	0	0	2014	2.34677	230061	2	0	0	14	2	4	3	2	2	1
2	2	2	2	2	0	0	2014	2.10226	230061	2	0	0	14	1	4	5	2	2	1
2	2	2	2	2	0	0	2014	2.10226	230061	2	0	0	15	1	4	5	2	2	1
2	2	2	2	2	0	0	2014	2.10226	230061	2	0	0	15	1	4	5	2	2	1
2	2	2	2	2	0	0	2014	2.10226	230061	2	0	0	15	1	4	5	2	2	1
1	2	2	2	1	1	0	2014	2.19776	230061	2	0	0	15	2	4	5	2	2	1
2	2	2	2	2	0	0	2014	2.10226	230061	2	1	0	15	1	4	5	2	1	1
1	2	2	2	2	1	0	2014	2.19776	230061	2	0	0	16	2	4	2	2	2	1
1	1	1	1		1	1	2014	2.10226	230061	2	0	0	14	1	4	5	2	2	1
2	2	2	2	2	0	0	2014	1.06199	230061	2	0	0	14	1	4	5	1	2	1
1	1	2	2	2	1	0	2014	2.14283	230061	2	0	0	16	1	6	5	2	2	1
1	2	2	2	2	1	0	2014	2.14283	230061	2	1	1	17	1	6	5	2	1	1
2	2	2	2	2	0	0	2014	2.28813	230061	2	0	0	16	1	6	3	2	2	1
2	1	2	2	2	1	0	2014	2.24017	230061	2	0	0	17	2	6	5	2	2	1
1	2	1	2	2	1	0	2014	2.24017	230061	2	0	0	17	2	6	5	2	2	1
1	2	1	1	2	1	1	2014	2.19776	230061	2	0	0	15	2	4	1	2	2	1
							2014	2.19776	230061	2	1	0	16	2	4	5	2	1	3
2	2	2	2	2	0	0	2014	2.4086	230061	2	0	0	15	2	5	5	2	1	1
1	1	2	2	2	1	0	2014	3.21259	230061	2	1	0	19	2	7	5	2	1	7
1	1	2	1	2	1	1	2014	2.10226	230061	2	1	0	14	1	4	5	2	1	2
2	2	1	2	2	1	0	2014	3.073	230061	2	0	0	17	1	7	5	2	1	6
2	2	2	2	2	0	0	2014	3.073	230061	2	1	1	17	1	7	5	2	1	7
2	2	1	2	2	1	0	2014	2.10226	230061	2	0	0	14	1	4	5	2	2	1
2	2	2	2	2	0	0	2014	2.10226	230061	2	0	0	15	1	4	5	2	1	1
1	1	1	1	2	1	1	2014	2.24017	230061	2	1	1	18	2	6	5	2	1	7
							2014	2.56405	230081	2	0	0	15	2	4	5	2	2	1
1	2	1	2	2	1	0	2014	1.29527	230081	2	1	0	15	2	4	5	1	1	3
2	2	2	2	2	0	0	2014	2.45264	230081	2	0	0	15	1	4	5	2	2	1
1	1	2	2	2	1	0	2014	2.56405	230081	2	1	1	14	2	4		2	1	1
1	2	2	2	2	1	0	2014	2.56405	230081	2	1	0	15	2	4	5		2	1
1	2	2	2	2	1	0	2014	2.45264	230081	2	1	1	16	1	4	5	2	1	7
2	2	1	2	2	1	0	2014	2.45264	230081	2	1	0	14	1	4	5	2	1	1
1	2	2	2	2	1	0	2014	2.45264	230081	2	1	0	16	1	4	5	2	1	1
2	2	2	2	2	0	0	2014	2.45264	230081	2	1	1	14	1	4	5	2	2	1
2	2	2	2	2	0	0	2014	2.61354	230081	2	0	0	16	2	6	5	2	2	1
1	2	1	2	2	1	0	2014	2.61354	230081	2	1	1	17	2	6	5	2	1	4
2	2	2	2	2	0	0	2014	2.49997	230081	2	0	0	17	1	6	5	2	2	1
1	2	2	2	2	1	0	2014	2.49997	230081	2	0	0	17	1	6	5	2	2	1
2	2	2	2	2	0	0	2014	2.49997	230081	2	0	0	17	1	6	5	2	2	1
2	2	2	2	2	0	0	2014	2.61354	230081	2	0	0	17	2	6	5	2	1	1
2	2	1	2	2	1	0	2014	2.49997	230081	2	0	0	16	1	6	5	2	2	1
2	2	2	2	2	0	0	2014	2.49997	230081	2	0	0	16	1	6	5	2	2	1
							2014	2.49997	230081	2	1	0	17	1	6	5	2	1	6
1	2	2	1	2	1	1	2014	2.56405	230081	2	0	0	15	2	4	5	2	2	1
1	2	2	2	2	1	0	2014	2.81003	230081	2	0	0	17	2	5	5	2	2	1
2	2	2	2	2	0	0	2014	2.68793	230081	2	0	0	16	1	5	5	2	1	1
2	2	2	2	2	0	0	2014	2.81003	230081	2	0	1	17	2	5	5	2	1	5
2	2	1	2	2	1	0	2014	2.61354	230081	2	0	0	16	2	6	2	2	2	1
2	2	2	2	2	0	0	2014	2.56405	230081	2	1	1	14	2	4	5	2	1	6
2	2	2	2	2	0	0	2014	2.81003	230081	2	0	0	16	2	5	5	2	2	1
1	2	2	2	2	1	0	2014	2.81003	230081	2	1	1	17	2	5		2	1	1
1	2	1	2	2	1	0	2014	2.61354	230081	2	0	0	17	2	6	5	2	2	1
2	2	2	2	2	0	0	2014	2.61354	230081	2	1	0	17	2	6	5	2	1	1
2	2	2	2	2	0	0	2014	2.34677	230061	2	0	0	15	2	4	3	2	2	1
2	2	2	2	2	0	0	2014	2.10226	230061	2	0	0	15	1	4	5	2	2	1
1	2	2	2	2	1	0	2014	2.10226	230061	2	1	0	16	1	4	4	2	1	1
1	1	2	2	2	1	0	2014	2.19776	230061	2	1	1	14	2	4	6	2	1	2
2	2	2	2	2	0	0	2014	2.19776	230061	2	0	0	14	2	4	5	2	2	1
2	2	2	2	2	0	0	2014	2.19776	230061	2	1	1	15	2	4	5	2	1	1
2	2	2	2	2	0	0	2014	2.2448	230061	2	0	0	16	1	4	3	2	2	1
1					1		2014	2.19776	230061	2	0	0	14	2	4	5	2	2	1
2	2	2	2	2	0	0	2014	2.10226	230061	2	0	0	14	1	4	5	2	2	1
							2014	2.10226	230061	2	1	0	15	1	4	5	2	1	2
2	2	2	2	2	0	0	2014	1.11023	230061	2	0	0	14	2	4	5	1	2	1
1	1	1	1	2	1	1	2014	2.10226	230061	2	0	0	15	1	4	5	2	1	2
1	1	2	1	2	1	1	2014	2.57191	230061	2	0	0	15	2	5	3	2	2	1
2	2	2	2	2	0	0	2014	2.30394	230061	2	0	0	16	1	5	5	2	1	1
							2014	2.30394	230061	2	0	0	16	1	5	5	2	1	1
2	2	2	2	2	0	0	2014	2.30394	230061	2	0	0	15	1	5	5	2	2	1
1	2	2	2	2	1	0	2014	2.30394	230061	2	0	0	16	1	5	5	2	2	1
2	2	2	2	2	0	0	2014	2.30394	230061	2	0	0	15	1	5	5	2	2	1
1	2	2	1	2	1	1	2014	2.14283	230061	2	0	0	16	1	6	5	2	1	1
2	2	2	1	2	1	1	2014	2.39207	230061	2	0	0	17	2	6	3		2	1
2	2	2	2	2	0	0	2014	2.14283	230061	2	0	0	17	1	6	5	2	2	1
1			1	2	1	1	2014	2.24017	230061	2	1	1	17	2	6	5	2	1	4
2	2	2	2	2	0	0	2014	2.30394	230061	2	0	0	15	1	5	5	2	1	1
1	2	2	1	2	1	1	2014	2.14283	230061	2	1	0	17	1	6	5	2	1	2
1	2	2	2	2	1	0	2014	3.073	230061	2	0	0	18	1	7	5	2	2	1
2	2	2	2	2	0	0	2014	2.57191	230061	2	0	0	15	2	5	3	2	2	1
2	2	2	2	2	0	0	2014	2.39207	230061	2	0	0	18	2	6	3	2	2	1
1	2	2	2	2	1	0	2014	3.43042	230061	2	1	0	18	2	7	3	2	1	1
							2014	3.21259	230061	2	0	0	18	2	7	4	2	2	2
1	2	2	1	2	1	1	2014	2.24017	230061	2	0	0	18	2	6	5	2	2	1
2	2	2	2	2	0	0	2014	2.19776	230061	2	0	0	15	2	4	5	2	2	1
2	2	2	2	2	0	0	2014	2.19776	230061	2	0	0	15	2	4	5	2	2	1
2	2	2	2	2	0	0	2014	2.19776	230061	2	0	0	14	2	4	1	2	2	1
1	2	2	1	2	1	1	2014	2.10226	230061	2	1	1	15	1	4	5	2	1	7
2	2	2	2	2	0	0	2014	2.10226	230061	2	0	0	15	1	4	5	2	2	1
2	1	2	2	2	1	0	2014	2.34677	230061	2	0	0	16	2	4	3	2	1	1
1	2	2	2	2	1	0	2014	2.34677	230061	2	0	0	16	2	4	3	2	2	1
1	2	2	2	2	1	0	2014	2.10226	230061	2	0	0	15	1	4	5	2	2	1
2	2	2	2	2	0	0	2014	2.10226	230061	2	0	0	15	1	4	5	2	2	1
2	2	2	2	2	0	0	2014	2.14283	230061	2	0	0	16	1	6	5	2	2	1
1	1	1	1	1	1	1	2014	2.24017	230061	2	1	1	18	2	6	5	2	1	1
1	2	2	2	2	1	0	2014	2.24017	230061	2	0	0	17	2	6	5	2	2	1
2	2	2	2	2	0	0	2014	2.24017	230061	2	0	0	16	2	6	5	2	2	1
1	2	1	2	2	1	0	2014	3.073	230061	2	0	0	17	1	7	6	2	1	1
2	1	2	2	2	1	0	2014	2.14283	230061	2	0	0	16	1	6	5	2	2	1
2	1	2	2	2	1	0	2014	2.39207	230061	2	0	0	17	2	6	3	2	2	1
2	2	2	1	2	1	1	2014	3.21259	230061	2	1	0	18	2	7	6	2	1	7
2	2	2	2	2	0	0	2014	2.10226	230061	2	0	0	14	1	4	5	2	2	1
2	2	2	2	2	0	0	2014	2.10226	230061	2	0	0	14	1	4	2	2	2	1
2	2	2	2	2	0	0	2014	2.4086	230061	2	0	0	16	2	5	5	2	2	1
2	2	2	2	2	0	0	2014	1.62289	230061	2	0	0	18	2	7	6	1	2	1
1	2	2	2	2	1	0	2014	2.30394	230061	2	0	0	17	1	5	5	2	2	1
1	1	1	1	2	1	1	2014	2.19776	230061	2	0	0	15	2	4	5	2	2	1
1	1	2	2	2	1	0	2014	1.21674	230061	2	0	0	15	2	5	6	1	2	1
2	2	2	2	2	0	0	2014	3.073	230061	2	0	0	18	1	7	5	2	2	1
2	2	2	2	2	0	0	2014	2.19776	230061	2	0	0	15	2	4	5	2	2	1
1	2		2	2	1	0	2014	2.34677	230061	2	1	1	15	2	4	3	2	1	5
2	2	2	2	2	0	0	2014	3.28136	230061	2	0	0	17	1	7	3	2	2	1
1	1	1	1	1	1	1	2014	3.073	230061	2	0	0	17	1	7	5	2	2	1
2	2	2					2014	3.21259	230061	2	0	0	18	2	7	5	2	2	1
2	2	2	2	2	0	0	2014	3.21259	230061	2	0	0	18	2	7	5	2	2	1
2	2	2	2	2	0	0	2014	3.21259	230061	2	1	1	18	2	7	5	2	1	1
2	2	2	2	2	0	0	2014	3.073	230061	2	0	0	18	1	7	5	2	1	1
2	2	2	2	2	0	0	2014	3.073	230061	2	0	0	18	1	7	5	2	1	7
1	2	2	2	2	1	0	2014	3.073	230061	2	0	0	17	1	7	2	2	1	1
2	2	2	2	2	0	0	2014	2.81003	230081	2	0	0	15	2	5	5	2	2	1
2	2	2	2	2	0	0	2014	2.81003	230081	2	0	0	15	2	5	5	2	2	1
2	2	2	2	2	0	0	2014	2.81003	230081	2	0	0	15	2	5	5	2	2	1
2	2	2	2	2	0	0	2014	2.68793	230081	2	0	0	16	1	5	5	2	2	1
1	2	1	2	2	1	0	2014	2.81003	230081	2	0	0	15	2	5	5	2	1	1
2	2	2	2	2	0	0	2014	2.81003	230081	2	0	0	16	2	5	5	2	1	1
2	2	2	2	2	0	0	2014	2.68793	230081	2	0	0	16	1	5	5	2	2	1
2	1	1	2	2	1	0	2014	2.68793	230081	2	1	1	16	1	5	5	2	1	6
1	2	1	1	2	1	1	2014	3.58516	230081	2	1	1	17	1	7	5	2	1	1
2	1	2	2	2	1	0	2014	2.81003	230081	2	0	0	16	2	5	5	2	1	1
2	2	2	2	2	0	0	2014	2.56405	230081	2	0	0	14	2	4	5	2	2	1
2	2	2	2	2	0	0	2014	2.45264	230081	2	0	0	15	1	4	5	2	2	1
1	2	1	1	2	1	1	2014	2.56405	230081	2	1	0	15	2	4	5	2	1	1
2	2	2	2	2	0	0	2014	2.45264	230081	2	0	0	14	1	4	5	2	1	1
2	2	2	2	2	0	0	2014	2.45264	230081	2	0	0	14	1	4	5	2	2	1
2	2	2	2	2	0	0	2014	2.45264	230081	2	0	0	14	1	4	5	2	2	1
1	1	1	2	1	1	0	2014	2.45264	230081	2	0	0	15	1	4	5	2	1	1
1	2	2	1	2	1	1	2014	2.45264	230081	2	1	1	15	1	4	5	2	1	6
1	2	2	1	2	1	1	2014	2.45264	230081	2	1	1	15	1	4	5	2	1	4
2	2	2	2	2	0	0	2014	2.68793	230081	2	1	1	16	1	5	5	2	1	1
1	2	2	1	2	1	1	2014	2.45264	230081	2	0	0	14	1	4	5	2	2	1
1	1	2	2	2	1	0	2014	2.61354	230081	2	0	0	17	2	6	5	2	2	1
1	2	2	2	2	1	0	2014	2.49997	230081	2	1	1	16	1	6	5	2	1	6
1	1	2	1	2	1	1	2014	2.81003	230081	2	0	0	16	2	5	5	2	2	1
1	2	2	1	2	1	1	2014	2.68793	230081	2	1	1	15	1	5	5	2	1	5
2	2	2	2	2	0	0	2014	2.81003	230081	2	0	0	16	2	5	5	2	2	1
1	2	1	2	2	1	0	2014	2.61354	230081	2	0	0	17	2	6	5	2	2	1
2	2	2	2	2	0	0	2014	3.58516	230081	2	0	0	18	1	7	5	2	2	1
1	2	2	2	2	1	0	2014	2.81003	230081	2	0	0	15	2	5	5	2	2	1
2	2	2	2	2	0	0	2014	2.81003	230081	2	0	0	16	2	5	5	2	2	1
1	2	2	2	2	1	0	2014	2.68793	230081	2	0	0	16	1	5	5	2	2	1
2	2	2	2	2	0	0	2014	20.267	420701	2	0	0	15	1	5	5	2	2	1
2	2	2	2	2	0	0	2014	20.267	420701	2	0	0	15	1	5	5	2	2	1
2	2	2	2	2	0	0	2014	19.5729	420701	2	0	0	15	2	5	2	2	2	1
2	2	2	2	1	1	0	2014	16.5893	420701	2	0	0	16	2	5	6	1	1	1
2	2	2	2	2	0	0	2014	22.1401	420701	2	0	0	16	2	5	3	2	2	1
1	2	2	2	2	1	0	2014	17.1776	420701	2	0	0	16	1	5	6	1	1	1
2	2	2	1	2	1	1	2014	22.1401	420701	2	0	0	16	2	5	3	2	2	1
2	2	2	2	2	0	0	2014	20.267	420701	2	0	0	16	1	5	5	2	1	3
1	1	1	1	1	1	1	2014	15.3447	420701	2	1	1	21	1	1	6		1
2	2	2	2	2	0	0	2014	22.7875	420701	2	0	0	17	1	6	5	2	2	1
2	2	2	2	2	0	0	2014	18.5383	420701	2	0	0	15	1	4	5	2	2	1
1	2	2	1	2	1	1	2014	18.5383	420701	2	0	0	15	1	4	5	2	2	1
1	2	1	2	2	1	0	2014	2.14436	260181	2	1	0	15	2	4	6	1	1	1
2	2	2	2	2	0	0	2014	2.074	260181	2	0	0	15	1	4	6	1	2	1
2	2	2	2	2	0	0	2014	2.14436	260181	2	0	0	15	2	4	6	1	2	1
2	2	2	2	2	0	0	2014	2.14436	260181	2	0	0	15	2	4	6	1	2	1
2	2	2	2	2	0	0	2014	5.27125	260181	2	0	0	18	2	6	6	1	2	1
2	2	2	2	2	0	0	2014	5.09831	260181	2	0	0	16	1	6	6	1	2	1
							2014	5.27125	260181	2	0	0	16	2	6	6	1	1	1
2	2	2	2	2	0	0	2014	5.27125	260181	2	0	0	17	2	6	6	1	2	1
1	2	2	2	2	1	0	2014	4.53675	260181	2	0	0	16	1	6	5	2	1	1
2	2	2	2	2	0	0	2014	5.09831	260181	2	0	0	16	1	6	6	1	2	1
							2014	5.27125	260181	2	1	1	16	2	6	6	1	1	1
							2014	5.09831	260181	2	0	0	17	1	6	6	1	2	1
							2014	5.27125	260181	2	0	0	18	2	6	6	1	2	1
2	2	2	2	2	0	0	2014	4.53675	260181	2	0	0	16	1	6	5	2	2	1
2	2	2	2	2	0	0	2014	5.08262	260181	2	0	0	18	2	7	5	2	2	1
2	2	2	2	2	0	0	2014	5.52434	260181	2	0	0	17	1	7	6	1	2	1
		1			1		2014	2.074	260181	2			16	1	4	6	1	2	2
							2014	5.71174	260181	2			17	2	7	6	1	2	1
2	2	2	2	2	0	0	2014	5.71174	260181	2	0	0	19	2	7	6	1	1	1
							2014	5.71174	260181	2	0	0	17	2	7	6	1	2	1
2	2	2	2	2	0	0	2014	2.14436	260181	2	0	0	15	2	4	6	1	2	1
2	2	2	2	2	0	0	2014	4.35154	260181	2	0	0	16	2	5	6	1	2	1
2	2	2	2	2	0	0	2014	2.81763	260181	2	0	0	9		4	3		2	1
2	2	2	2	2	0	0	2014	5.53021	260181	2	0	0	16	1	5	3	2	2	1
1	1	1	2	2	1	0	2014	4.91586	260181	2	0	0	17	1	7	5	2	1	2
1	1	1	1	1	1	1	2014	4.35154	260181	2	1	1	15	2	5	6	1	2	4
1	2	1	1	2	1	1	2014	3.74519	260181	2	0	0	16	1	5	5	2	1	1
							2014	4.35154	260181	2	0	0	17	2	5	4	1	2	1
2	2	2	2	2	0	0	2014	4.20877	260181	2	0	0	16	1	5	5	1	2	1
2	2	2	2	2	0	0	2014	4.20877	260181	2	0	0	16	1	5	6	1	2	1
2	2	2	2	2	0	0	2014	2.14436	260181	2	0	0	15	2	4	6	1	2	1
2	2	2	2	2	0	0	2014	2.074	260181	2	0	0	15	1	4	2	1	2	1
2	2	2	2	2	0	0	2014	5.27125	260181	2	1	0	17	2	6	3	1	1	1
1	2	2	2	2	1	0	2014	4.53675	260181	2	0	0	17	1	6	5	2	1	2
2	2	2	2	2	0	0	2014	4.69065	260181	2	0	0	16	2	6	5	2	2	1
2	2	2	2	2	0	0	2014	5.09831	260181	2	0	0	16	1	6	6	1	2	1
1	2	1	2	1	1	0	2014	5.09831	260181	2	0	1	17	1	6	6	1	1	2
2	2	1	1	2	1	1	2014	4.69065	260181	2	0	1	16	2	6	5	2	2	7
2	2	2	2	2	0	0	2014	3.74519	260181	2	0	0	16	1	5	6	2	1	1
							2014	3.74519	260181	2	1	0	16	1	5	6	2	1	2
2	2	2	2	2	0	0	2014	3.74519	260181	2	0	0	16	1	5	5	2	2	1
2	2	2	2	2	0	0	2014	4.20877	260181	2	0	0	15	1	5	6	1	2	1
							2014	4.20877	260181	2	0	0	16	1	5	6	1	2	1
2	2	2	2	2	0	0	2014	3.87224	260181	2	0	0	17	2	5	1	2	2	1
1	1	1	2	2	1	0	2014	5.71174	260181	2	1	1	9	2	7	4	1	1	6
2	2	2	2	2	0	0	2014	4.35154	260181	2	0	0	16	2	5	5	1	2	1
2	2	1	2	2	1	0	2014	5.08262	260181	2	0	0	18	2	7	5	2	2	1
2	2	2	2	2	0	0	2014	4.53675	260181	2	0	0	17	1	6	5	2	2	1
2	2	2	2	2	0	0	2014	4.53675	260181	2	0	0	16	1	6	5	2	2	1
							2014	1.84556	260181	2	0	0	14	1	4	6	2	2	1
							2014	2.074	260181	2	0	0	14	1	4	6	1	2	1
							2014	1.84556	260181	2			14	1	4	5	2	2	1
2	2	2	2	2	0	0	2014	2.074	260181	2	0	0	14	1	4	6	1	1	1
							2014	2.14436	260181	2	0	0	15	2	4	6	1	2	1
							2014	2.81763	260181	2	0		14	2	4	3	2	1	7
							2014	2.14436	260181	2	0		15	2	4	6	1	2	1
1	1	1	1	1	1	1	2014	4.35154	260181	2	0		16	2	5		1	1	1
2	2	2	2	2	0	0	2014	3.74519	260181	2	0	0	16	1	5	5	2	2	1
1	2	2	2	2	1	0	2014	4.20877	260181	2	0	0	15	1	5	6	1	2	1
1	1	2	1	1	1	1	2014	4.20877	260181	2	0	0	15	1	5	6	1	2	1
2	2	2	2	2	0	0	2014	5.27125	260181	2	0	0	16	2	6		1	2	1
							2014	5.09831	260181	2	0	0	18	1	6	6	1	2	1
2	2	2	2	2	0	0	2014	3.87224	260181	2	0	0	16	2	5	6	2	2	1
							2014	4.35154	260181	2	0	0	16	2	5	6	1	2	1
1	2	2	2	2	1	0	2014	4.20877	260181	2	0	0	15	1	5	6	1	1	1
2	2	2	2	2	0	0	2014	22.0071	420701	2	0	0	16	2	6	5	2	2	1
2	2	2	2	2	0	0	2014	18.6524	420701	2	0	0	17	2	6	6	1	2	1
2	2	2	2	2	0	0	2014	16.5893	420701	2	0	0	16	2	5	6	1	2	1
1	2	2	1	1	1	1	2014	19.5729	420701	2	1	1	16	2	5	5	2	1	2
2	2	2	2	2	0	0	2014	22.1401	420701	2	0	0	17	2	5	3	2	2	1
2	2	2	2	2	0	0	2014	22.9252	420701	2	0	0	16	1	5	3	2	2	1
1	1	2	2	2	1	0	2014	18.5383	420701	2	0	0	15	1	4	5	2	2	1
2	2	2	2	2	0	0	2014	19.5729	420701	2	1	0	16	2	5	5	2	2	1
2	2	2	1	2	1	1	2014	18.5383	420701	2		0	15	1	4	5	2	2	1
2	2	2	2	2	0	0	2014	20.9697	420701	2	0	0	15	1	4	3	2	2	1
1	2	2	2	2	1	0	2014	22.0071	420701	2	1	1	17	2	6	5	2	2	1
2	2	2	2	2	0	0	2014	48.9154	420701	2	0	0	17	2	7	6	2	2	1
2	2	2	2	2	0	0	2014	4.35154	260181	2	0	0	17	2	5	6	1	2	1
2	2	2	2	2	0	0	2014	4.35154	260181	2	0	0	17	2	5	6	1	2	1
2	1	1	2	1	1	0	2014	4.35154	260181	2	0	0	17	2	5	6	1	2	1
							2014	4.35154	260181	2	0	0	17	2	5	6	1	2	1
							2014	5.09831	260181	2	0	0	16	1	6	6	1	2	3
2	2	2	2	2	0	0	2014	3.87224	260181	2	0	0	17	2	5	6	2	2	1
1	2	2	2	2	1	0	2014	3.74519	260181	2	0	0	15	1	5	5	2	1	1
2	2	2	2	2	0	0	2014	3.87224	260181	2	0	0	16	2	5	5	2	1	1
							2014	4.20877	260181	2			20	1	5	2	1	2
1	2	2	2	2	1	0	2014	2.074	260181	2	0	0	14	1	4	6	1	2	1
2	2	2	2	2	0	0	2014	4.35154	260181	2	0	0	16	2	5	6	1	2	1
1	1	1	2	2	1	0	2014	3.74519	260181	2	0	0	15	1	5	5	2	1	5
2	2	2	2	2	0	0	2014	4.35154	260181	2	0	0	16	2	5	6	1	2	1
2	2	2	2	2	0	0	2014	4.20877	260181	2	0	0	15	1	5	6	1	2	1
2	2	2	2	2	0	0	2014	4.20877	260181	2	0	0	18	1	5	6	1	2	1
2	2	2	2	2	0	0	2014	3.87224	260181	2	0	0	17	2	5	5	2	2	1
							2014	4.35154	260181	2	0	0	16	2	5	6	1	2	1
							2014	5.52434	260181	2	0	0	17	1	7	6	1	2	1
2	2	2	2	2	0	0	2014	5.52434	260181	2	0	0	17	1	7	6	1	1	1
2	2	2	2	2	0	0	2014	5.52434	260181	2	0	0	18	1	7	5	1	2	1
							2014	5.71174	260181	2	0	0	19	2	7	6	1	2	1
							2014	5.71174	260181	2	1	1	17	2	7	5	1	1	1
							2014	5.71174	260181	2	0	0	18	2	7	6	1	2
2	2	2	2	2	0	0	2014	5.71174	260181	2	0	0	18	2	7	5	1	2	1
1	2	2	2	2	1	0	2014	4.20877	260181	2	0	0	16	1	5	6	1	2	1
2	2	2	2	2	0	0	2014	4.35154	260181	2	0	0	17	2	5	6	1	2	1
							2014	4.35154	260181	2	0	0	17	2	5	6	1	1	1
2	2	2	2	2	0	0	2014	4.35154	260181	2	0	0	15	2	5	6	1	2	1
2	2	2	2	2	0	0	2014	5.27125	260181	2	0	0	17	2	6	5	1	2	1
	2	2	2			0	2014	3.87224	260181	2	1	0	15	2	5	2	2	2	3
1	2	2	2	2	1	0	2014	5.27125	260181	2	0	0	17	2	6	5	1	2	1
2	2	2	2			0	2014	4.35154	260181	2	0	0	15	2	5	5	1	2	1
							2014	5.71174	260181	2			18	2	7	6	1	1	2
							2014	5.71174	260181	2	0	0	19	2	7		1	2	1
2	2	2	2	2	0	0	2014	5.71174	260181	2	0	0	18	2	7	6	1	2	1
2	2	2	2	2	0	0	2014	4.35154	260181	2	0	0	15	2	5	3	1	2	1
1	1	1	1	1	1	1	2014	4.69065	260181	2	1	1	17	2	6	5	2	1	7
1	1	1	1	1	1	1	2014	4.69065	260181	2	0	0	17	2	6	5	2	1	1
2	2	2	2	2	0	0	2014	5.27125	260181	2	0	0	17	2	6	6	1	2	1
2	2	2	2	2	0	0	2014	5.52434	260181	2	0	0	18	1	7	6	1	2	1
2	2	2	2	2	0	0	2014	5.52434	260181	2	0	0	18	1	7	6	1	2	1
2	2	2	2	2	0	0	2014	4.91586	260181	2	0	0	18	1	7	5	2	2	1
2	2	2	2	2	0	0	2014	5.09831	260181	2	0	0	17	1	6	5	1	2	1
2	2	2	2	2	0	0	2014	4.35154	260181	2	0	0	15	2	5	6	1	2	1
2	2	2	2	2	0	0	2014	4.20877	260181	2	0	0	17	1	5	5	1	2	1
1	1	1	1	1	1	1	2014	5.71174	260181	2	1	1	9	2	7	3	1	1	1
2	2	2	2	2	0	0	2014	4.35154	260181	2	0	0	16	2	5	6	1	2	1
							2014	1.84556	260181	2	0	0	16	1	4	5	2	1	1
2	2	2	2	2	0	0	2014	1.90817	260181	2	0	0	15	2	4	5		2	1
1	2	2	2	2	1	0	2014	3.87224	260181	2	0	0	17	2	5	5	2	1	1
1	1	1	1	1	1	1	2014	2.14436	260181	2	0	0	15	2	4	6	1	2	1
							2014	2.14436	260181	2			14	2	4	6	1	1	1
							2014	2.074	260181	2	0	0	16	1	4	6	1	2	1
							2014	1.84556	260181	2	0	0	14	1	4	5	2	1	1
2	2	2	2	2	0	0	2014	2.074	260181	2	0	0	15	1	4	6	1	1	1
2	2	2	2	2	0	0	2014	2.074	260181	2	0	0	15	1	4	6	1	2	1
2	2	2	2	2	0	0	2014	4.53675	260181	2	0	0	17	1	6	5	2	2	1
2	2	2	2	2	0	0	2014	3.87224	260181	2	0	0	15	2	5	1	2	2	1
2	2	2	2	2	0	0	2014	5.08262	260181	2	0	0	17	2	7	5	2	2	1
2	2	2	2	2	0	0	2014	3.87224	260181	2	0	0	15	2	5	5	2	2	1
2	2	2	2	2	0	0	2014	4.35154	260181	2	0	0	16	2	5	6	1	2	1
2	2	2	2	2	0	0	2014	2.074	260181	2	0	0	15	1	4	5	1	2	1
2	1	2	2	2	1	0	2014	2.14436	260181	2	0	0	16	2	4	6	1	2	1
2	2	2	2	2	0	0	2014	2.72518	260181	2	0	0	14	1	4	3	2	2	1
2	2	2	2	2	0	0	2014	2.72518	260181	2	0	0	15	1	4	3	2	2	1
2	2	2	2	2	0	0	2014	2.074	260181	2	0	0	15	1	4	6	1	2	1
2	2	2	2	2	0	0	2014	4.20877	260181	2	0	0	15	1	5	6	1	2	1
2	2	2	2	2	0	0	2014	2.37768	670051	2	1	0	16	2	4	5	2	1	1
2	2	2	2	2	0	0	2014	2.25663	670051	2	0	0	16	2	4	3	2	1	2
2	2	2	2	2	0	0	2014	2.05296	670051	2	0	0	16	1	4	6	2	2	1
2	2	2	2	2	0	0	2014	2.37768	670051	2	0	0	16	2	4	5	2	2	1
2	2	2	2	2	0	0	2014	2.25663	670051	2	0	0	15	2	4	3	2	2	1
2	2	2	2	2	0	0	2014	1.94844	670051	2	1	1	16	1	4	3	2	1	3
2	2	1	1	2	1	1	2014	1.00259	670051	2	0	0	15	1	4	6	1	2	1
2	2	2	2	2	0	0	2014	2.37768	670051	2	1	0	15	2	4	5	2	1	2
1		1	1		1	1	2014	2.05296	670051	2	0	0	15	1	4	1	2	1	1
1	2	2	1	2	1	1	2014	2.37768	670051	2	0	0	15	2	4	5	2	1	1
2	2	2	2	2	0	0	2014	2.37768	670051	2	1	0	14	2	4	5	2	2	1
1	2	2	2	2	1	0	2014	3.00339	670021	2	0	0	15	2	4	6	2	1	1
2	2	2	2	2	0	0	2014	2.59322	670021	2	0	0	14	1	4	5	2	2	1
2	2	2	2	2	0	0	2014	3.00339	670021	2	1	0	14	2	4	5	2	1	2
1	2	1	1	2	1	1	2014	2.59322	670021	2	0	0	15	1	4	5	2	1	1
2	2	2	2	2	0	0	2014	2.85048	670021	2	0	0	15	2	4	3	2	2	1
1	2	1	1	1	1	1	2014	2.59322	670021	2	1	1	15	1	4	1	2	1	1
2	2	2	2	2	0	0	2014	2.59322	670021	2	0	0	14	1	4	5	2	2	1
2	2	1	2	2	1	0	2014	3.00339	670021	2	0	0	15	2	4	5	2	1	1
2	2	2	2	2	0	0	2014	2.59322	670021	2	0	0	14	1	4	5	2	2	1
2	1	2	1	2	1	1	2014	3.52508	670051	2	1	0	15	1	5	5	2	1	1
2	2	2	2	2	0	0	2014	3.52508	670051	2	0	0	16	1	5	6	2	2	1
2	2	2	2	2	0	0	2014	3.52508	670051	2	0	0	16	1	5	5	2	1	1
1	2	2	1	2	1	1	2014	3.52508	670051	2	1	0	15	1	5	5	2	1	2
2	2	2	2	2	0	0	2014	3.52508	670051	2	1	0	15	1	5	5	2	1	1
2	2	2	2	2	0	0	2014	3.52508	670051	2	0	0	15	1	5	5	2	2	1
2	2	2	2	2	0	0	2014	4.08265	670051	2	1	0	15	2	5	5	2	2	1
2	2	2	2	2	0	0	2014	3.52508	670051	2	0	0	16	1	5	1	2	2	1
1	1	1	2	1	1	0	2014	4.08265	670051	2	1	1	16	2	5	5	2	2	1
2	2	2	2	2	0	0	2014	4.08265	670051	2	0	0	16	2	5	5	2	1	1
1	2	1	2	2	1	0	2014	4.08265	670051	2	0	0	16	2	5	5	2	2	1
2	2	2	2	2	0	0	2014	3.52508	670051	2	0	0	15	1	5	5	2	2	1
2	2	2	2	2	0	0	2014	4.08265	670051	2	0	0	16	2	5	5	2	1	3
2	2	2	2	2	0	0	2014	4.45274	670021	2	0	0	16	1	5	5	2	1	1
							2014	1.58215	670021	2	0	0	17	1	5	6	1	1	1
2	2	2	2	2	0	0	2014	4.22603	670021	2	0	0	16	1	5	3	2	2	1
2	2	2	2	2	0	0	2014	4.22603	670021	2	0	0	16	1	5	3	2	2	1
2	2	2	2	2	0	0	2014	2.59322	670021	2	0	0	15	1	4	5	2	2	1
2	2	1	2	2	1	0	2014	3.00339	670021	2	0	0	15	2	4	5	2	2	1
2		1	2	2	1	0	2014	3.00339	670021	2	0	0	14	2	4	5	2	2	1
2	2	2	2	2	0	0	2014	2.59322	670021	2	0	0	15	1	4	5	2	2	1
2	2	2	2	2	0	0	2014	2.59322	670021	2	0	0	14	1	4	5	2	2	1
1	2	2	2	2	1	0	2014	2.59322	670021	2	0	0	15	1	4	5	2	2	1
2	2	2	2	2	0	0	2014	3.00339	670021	2	0	0	15	2	4	1	2	2	1
1	2	2	2	2	1	0	2014	2.46118	670021	2	0	0	15	1	4	3	2	2	1
2	2	2	2	2	0	0	2014	2.59322	670021	2	0	0	15	1	4	5	2	2	1
2	2	2	2	2	0	0	2014	2.59322	670021	2	0	0	14	1	4	5	2	2	1
2	2	2	2	2	0	0	2014	2.46118	670021	2	0	0	14	1	4	3	2	2	1
1	1	1	2	2	1	0	2014	3.31402	670051	2	1	1	17	1	7	5	2	1	5
1	2	2	2	2	1	0	2014	6.94818	670051	2	0	0	16	2	6	5	2	2	1
1	2	2	2	2	1	0	2014	5.99927	670051	2	1	0	17	1	6	5	2	1	6
2	2	2	2	2	0	0	2014	5.69382	670051	2	0	0	16	1	6	3	2	1	3
2	2	2	2	2	0	0	2014	5.99927	670051	2	0	0	17	1	6	5	2	1	3
2	2	2	2	2	0	0	2014	6.94818	670051	2	0	0	17	2	6	5	2	2	1
1	2	2	2	2	1	0	2014	5.99927	670051	2	0	0	16	1	6	5	2	1	1
1	1	2	2	1	1	0	2014	6.59442	670051	2	0	0	17	2	6	3	2	1	2
2	2	1	2	2	1	0	2014	5.99927	670051	2	0	0	17	1	6	5	2	1	1
2	2	1	2	2	1	0	2014	5.99927	670051	2	0	0	18	1	6	5	2	2
2	2	2	2	2	0	0	2014	4.60142	670021	2	1	1	17	2	7	3	2	1	5
2	2	2	2	2	0	0	2014	4.84826	670021	2	0	0	18	2	7	5	2	2	1
2	2	1	2	2	1	0	2014	4.84826	670021	2	1	0	17	2	7	5	2	1	2
2	2	2	2	2	0	0	2014	4.18613	670021	2	0	0	17	1	7	5	2	2	1
2	2	2	2	2	0	0	2014	4.18613	670021	2	0	0	17	1	7	5		2	1
1	1	2	1	2	1	1	2014	4.84826	670021	2	1	1	18	2	7	5	2	1	7
1	2	2	2	1	1	0	2014	4.84826	670021	2	0	0	17	2	7	5	2	2	1
2	2	2	2	2	0	0	2014	4.18613	670021	2	1	0	18	1	7	5	2	1	1
1	2	2	1	2	1	1	2014	4.18613	670021	2	0	0	17	1	7	5	2	2	1
2	2	2	2	2	0	0	2014	4.18613	670021	2	0	0	18	1	7	5	2	2	1
2	2	2	2	2	0	0	2014	4.84826	670021	2	1	0	18	2	7	5	2	1	3
2	2	2	2	2	0	0	2014	4.84826	670021	2	1	0	18	2	7	5	2	1	1
1	2	2	1	2	1	1	2014	4.84826	670021	2			18	2	7	5	2	2
1	1	2	1	1	1	1	2014	4.84826	670021	2	1	1	18	2	7	5	2	1	7
1	1	1	1	1	1	1	2014	1.72269	670021	2	1	1	18	2	7	3	1	1	7
2	2	2	2	2	0	0	2014	4.18613	670021	2	0	0	17	1	7	5	2	2	1
2	2	2	2	2	0	0	2014	4.18613	670021	2			18	1	7	5	2	2	1
1	1	1	2	2	1	0	2014	4.84826	670021	2	0	0	18	2	7	5	2	2	1
1	2	2	1	2	1	1	2014	4.18613	670021	2	1	0	19	1	7	5	2	1	7
			2			0	2014	4.60142	670021	2	1	1	18	2	7	3	2	1	5
2	1	2	2	2	1	0	2014	1.00259	670051	2	0	0	15	1	4	6	1	1	1
2	2	2	1	2	1	1	2014	2.05296	670051	2	1	1	15	1	4	5	2	2	1
2	2	2	2	2	0	0	2014	2.37768	670051	2	0	0	15	2	4	5	2	2	1
1	2	2	2	2	1	0	2014	2.05296	670051	2	1	1	15	1	4	5	2	1	5
2	2	2	2	2	0	0	2014	2.37768	670051	2	1	0	14	2	4	5	2	1	1
1	2	2	1	2	1	1	2014	2.37768	670051	2	0	0	15	2	4	5	2	2	1
1	2	2	2		1	0	2014	2.05296	670051	2	0	0	15	1	4	5	2	2	1
1		1	1	2	1	1	2014	2.05296	670051	2	0	0	14	1	4	5	2	2	1
1	2	1	2	1	1	0	2014	2.37768	670051	2	0	0	15	2	4	1	2	1	3
2	2	1	2	2	1	0	2014	2.37768	670051	2	0	0	14	2	4	5	2	2	1
1	1	2	2	2	1	0	2014	2.05296	670051	2		0	15	1	4	5	2	2	1
2	2	2	2	2	0	0	2014	2.05296	670051	2	0	0	15	1	4	5	2	2	1
2	2	1	2	2	1	0	2014	7.57802	670021	2	0	0	16	1	6	5	2	1	1
2	2	2	2	2	0	0	2014	7.57802	670021	2	0	0	16	1	6	5	2	2	1
2	2	2	2	2	0	0	2014	3.973	670021	2	0	0	18	1	7	3	2	2	1
1					1		2014	4.84826	670021	2	0	0	18	2	7	5	2	2	1
2	2	2	2	2	0	0	2014	4.84826	670021	2	0	0	18	2	7	5	2	2	1
2	2	2	2	2	0	0	2014	4.84826	670021	2	0	0	18	2	7	5	2	2	1
2	2	2	2	2	0	0	2014	4.84826	670021	2	0	0	18	2	7	5	2	2	1
2	2	2	2	2	0	0	2014	4.84826	670021	2	1	1	18	2	7	5	2	1	3
1	1	2	2	2	1	0	2014	4.08265	670051	2	0	0	15	2	5	5	2	2	1
2	2	2	2	2	0	0	2014	4.08265	670051	2	0	0	15	2	5	5	2	1	1
							2014	3.87479	670051	2	0	0	15	2	5	3	2	1	2
1	2	2	1	2	1	1	2014	4.08265	670051	2	0	0	15	2	5	5	2	2	1
2	2	2	2	2	0	0	2014	3.87479	670051	2	0	0	16	2	5	3	2	2	1
1	2	2	1	2	1	1	2014	1.25254	670051	2	1	1	17	1	5	6	1	1	1
2	2	2	2	2	0	0	2014	3.52508	670051	2	0	0	16	1	5	5	2	1	1
1	1			1	1		2014	4.45274	670021	2			17	1	5	5	2	1	7
2	2	2	2	2	0	0	2014	4.45274	670021	2	0	0	15	1	5	5	2	2	1
2	2	2	2	2	0	0	2014	5.15704	670021	2	0	0	16	2	5	5	2	2	1
1	1	1	1	1	1	1	2014	4.45274	670021	2	1	1	16	1	5	5	2	1	7
							2014	5.15704	670021	2			18	2	5	2	2	1	1
1	2	2	2	2	1	0	2014	2.37768	670051	2	1	0	15	2	4	5	2	2	1
1	2	2	2	2	1	0	2014	2.05296	670051	2	1	0	14	1	4	5	2	1	5
2	2	2	2	2	0	0	2014	1.00257	670051	2	0	0	15	2	4	3	1	1	1
2	2	2	2	2	0	0	2014	2.25663	670051	2	1	1	14	2	4	3	2	1	5
1	1	2	1	2	1	1	2014	2.05296	670051	2	1	0	16	1	4	5	2	1	1
2	2	1	2	2	1	0	2014	2.37768	670051	2	0	0	15	2	4	5	2	2	1
2	1	1	2	2	1	0	2014	2.37768	670051	2	0	0	14	2	4	5	2	1	1
1	2	1	2	2	1	0	2014	2.05296	670051	2	0	0	15	1	4	5	2	1	1
2	2	2	2	2	0	0	2014	1.00257	670051	2	0	0	15	2	4	5	1	2	1
1	2	2	1	2	1	1	2014	2.37768	670051	2	1	1	15	2	4	5	2	1	2
2	2	2	2	2	0	0	2014	1.00094	670051	2	0	0	21	1	1	2	1	2	1
1	2	2	1	1	1	1	2014	2.05296	670051	2	1	0	15	1	4	5	2	1	1
2	2	2	2	2	0	0	2014	2.05296	670051	2	0	0	16		4	2	2	1	1
1	1	2	1	1	1	1	2014	2.37768	670051	2	1	1	15	2	4	5	2	1	5
1	2	2	1	2	1	1	2014	1.00259	670051	2	0	0	14	1	4	5	1	2	1
2	2	2	2	2	0	0	2014	2.37768	670051	2	0	0	14	2	4	5	2	2	1
2	2	1	2		1	0	2014	2.05296	670051	2	0	0	15	1	4	5	2	1	1
2	2	2	2	2	0	0	2014	2.37768	670051	2	0	0	15	2	4	5	2	2	1
1	1	1	1	1	1	1	2014	6.94818	670051	2	1	0	17	2	6	5	2	1	7
1	2	2	1	2	1	1	2014	5.99927	670051	2	1	1	17	1	6	5	2	1	1
2	2	2	2	2	0	0	2014	3.52508	670051	2	0	0	16	1	5	5	2	1	1
2	1	1	2	2	1	0	2014	6.94818	670051	2	0	0	17	2	6	5	2	2	1
1	1	2	1	2	1	1	2014	6.94818	670051	2	0	0	19	2	6	5	2	1	1
1	2	2	2	2	1	0	2014	2.59322	670021	2	0	0	14	1	4	5	2
							2014	2.59322	670021	2	0	0	14	1	4	5	2	2	1
1	2	1	2	2	1	0	2014	3.00339	670021	2	0	0	14	2	4	5	2	2	1
1	2	2	2	2	1	0	2014	2.59322	670021	2	0	0	15	1	4	5	2	2	1
2	2	2	2	2	0	0	2014	2.59322	670021	2	0	0	15	1	4	5	2	2	1
2	1	2	2	1	1	0	2014	2.46118	670021	2	0	0	14	1	4	3	2	2	1
2	2	2		2			2014	3.00339	670021	2	0	0	14	2	4	5	2	2	1
2	2	2	2	2	0	0	2014	2.59322	670021	2	0	0	15	1	4	5	2	2	1
1	1	1	1	1	1	1	2014	3.00339	670021	2	1	1	13	2	4	5	2	1	7
1	2	2	1	2	1	1	2014	2.59322	670021	2	0	0	14	1	4	5	2	2	1
2	2	2	2	2	0	0	2014	3.00339	670021	2	0	0	15	2	4	5	2	2	1
1	1	1	1	2	1	1	2014	3.00339	670021	2	0	0	14	2	4	5	2	2	1
							2014	2.25663	670051	2	0	0	15	2	4	3	2	2	1
2	2	2	2	2	0	0	2014	1.94844	670051	2	0	0	16	1	4	3	2	2	1
							2014	2.05296	670051	2	0	0	16	1	4	5	2	2	1
2	2	2	2	2	0	0	2014	2.37768	670051	2	0	0	15	2	4	5	2	2	1
2	2	2	2	2	0	0	2014	2.25663	670051	2	0	0	14	2	4	3	2	2	1
1	2	2	2	2	1	0	2014	2.25663	670051	2	0	0	17	2	4	3	2	2	1
2	2	2	2	2	0	0	2014	2.37768	670051	2	0	0	15	2	4	5	2	2	1
							2014	2.37768	670051	2	1	0	14	2	4	5	2	1	1
1	2	2	2	2	1	0	2014	2.05296	670051	2	0	0	15	1	4	5	2	1	1
2	2	2	2	2	0	0	2014	1.94844	670051	2	0	0	15	1	4	3	2	2	1
2	1	2	2	2	1	0	2014	3.973	670021	2	0	0	18	1	7	3	2	2	1
2	2	2	2	2	0	0	2014	4.84826	670021	2	0	0	17	2	7	5	2	2	1
2	2	2	2	2	0	0	2014	4.18613	670021	2	0	0	18	1	7	5	2	1	1
2	2	2	2	2	0	0	2014	4.84826	670021	2	1	0	18	2	7	5	2	1	1
1	2	1	1	2	1	1	2014	4.84826	670021	2	1	0	17	2	7	5	2	1	1
1	1			1	1		2014	4.60142	670021	2	0	0	18	2	7	3	2	2	1
2	2	2	2	2	0	0	2014	1.72269	670021	2	0	0	17	2	7	6	1	1	1
1	2	2	1	2	1	1	2014	4.84826	670021	2	1	1	18	2	7	5	2	1	6
1	2	2	1	2	1	1	2014	2.37768	670051	2	1	1	15	2	4	6	2	1	1
1	2	2	2	2	1	0	2014	2.37768	670051	2	0	0	14	2	4	5	2	1	1
	2	2	2	2		0	2014	2.37768	670051	2	1	1	14	2	4	5	2	1	2
1	1	1	1	1	1	1	2014	2.05296	670051	2	0	0	15	1	4	5	2	1	3
1	1	2	2	2	1	0	2014	2.25663	670051	2	1	1	15	2	4	3	2	1	2
2	2	2	2	2	0	0	2014	3.973	670021	2	1	0	18	1	7	3	2	1	1
1	1	2	2	2	1	0	2014	3.973	670021	2	0	0	17	1	7	3	2	1	1
1	1	2	2	2	1	0	2014	1.48742	670021	2	1	0	17	1	7	5	1	1	7
1	1	1	1	2	1	1	2014	3.973	670021	2	0	0	18	1	7	3	2	1	1
2	2	2	2	2	0	0	2014	4.84826	670021	2	0	0	17	2	7	5	2	2	1
2	2	2	2	2	0	0	2014	4.84826	670021	2	1	0	18	2	7	5	2	1	2
2		1	2	2	1	0	2014	4.84826	670021	2	0	0	18	2	7	1	2	1	1
1	2	1	2	2	1	0	2014	1.72269	670021	2	1	1	18	2	7	6	1	1	3
1	1	1	2	1	1	0	2014	4.89447	670021	2	0	0	21	2	5	3	2	1	6
1	1	1	1	1	1	1	2014	2.85048	670021	2	1	1	21	2	4	3	2	1	7
1	2	2	2	2	1	0	2014	4.84826	670021	2	1	1	18		7	5	2	1	7
2	2	2	2	2	0	0	2014	4.84826	670021	2	0	0	18	2	7	5	2	2	1
							2014	4.22603	670021	2	0	0	16	1	5	3	2	1	1
2	2	2	2	2	0	0	2014	5.15704	670021	2	0	0	15	2	5	5	2	1	1
1	2	1	1	2	1	1	2014	1.19181	670021	2	0	1	21	1	1	4	1	1	7
1	1	1	1	1	1	1	2014	3.23839	670021	2	1	1	21	2	3	3	2	1	7
							2014	4.22603	670021	2	0	0	16	1	5	3	2	2	1
1	1			2	1		2014	4.89447	670021	2	0	0	15	2	5	3	2	2	1
							2014	5.15704	670021	2			16	2	5	5	2	1	4
2	2	1	2	2	1	0	2014	4.45274	670021	2	0	0	16	1	5	1	2	1	1
2	2	1	2	2	1	0	2014	5.15704	670021	2	0	0	16	2	5	5	2	2	1
							2014	5.15704	670021	2	1	1	17	2	5	5	2	1	7
2	2	2	2	2	0	0	2014	4.08265	670051	2	0	0	15	2	5	5	2	2	1
1	2	2	2	2	1	0	2014	3.52508	670051	2	1	0	17	1	5	5	2	1	2
1	2	1	2		1	0	2014	3.52508	670051	2	0	0	17	1	5	5	2	2	1
2	2	2	2	2	0	0	2014	3.34561	670051	2	0	0	16	1	5	3	2	1	1
1	2	1	1	1	1	1	2014	4.08265	670051	2	1	1	17	2	5	5	2	1	7
2	2	1	2	2	1	0	2014	3.52508	670051	2	0	0	16	1	5	5	2	2	1
1	1	2	2	2	1	0	2014	4.08265	670051	2	0	0	16	2	5	5	2	2	1
1	1	1	1	2	1	1	2014	3.52508	670051	2	1	1	16	1	5	5	2	1	4
1	2	1	1	2	1	1	2014	4.08265	670051	2	0	0	15	2	5	5	2	1	1
1	1	2	2	2	1	0	2014	3.52508	670051	2	1	0	17	1	5	5	2	1	1
1	2	2	2	2	1	0	2014	1.17754	670051	2	0	0	18	1	7	5	1	1	5
1	2	2	1	2	1	1	2014	3.83821	670051	2	0	0	18	2		6	2	2	1
2	2	2	2	2	0	0	2014	3.14529	670051	2	0	0	18	1	7	3	2	2	1
2	2	2	2	2	0	0	2014	5.99927	670051	2	0	0	16	1	6	5	2	2	1
2	2	2	1	2	1	1	2014	3.64279	670051	2	0	0	19	2	7	3	2	2	1
1	2	2	2	2	1	0	2014	1.17754	670051	2	0	0	9	1	7	2	1	1	7
2	2	2	2	2	0	0	2014	4.08265	670051	2	0	0	15	2	5	5	2	2	1
1	2	2	2	2	1	0	2014	4.08265	670051	2	1	1	16	2	5	5	2	1	5
2	2	1	2	2	1	0	2014	4.08265	670051	2	0	0	17	2	5	5	2	2	1
1	2	2	2	2	1	0	2014	3.52508	670051	2	1	1	16	1	5	5	2	1	7
1	2	1	2	2	1	0	2014	1.25254	670051	2	1	1	15	1	5	6	1	1	7
2	2	2	2	2	0	0	2014	3.87479	670051	2	0	0	15	2	5	3	2	2	1
							2014	3.00339	670021	2	0	0	16	2	4	5	2	2	1
2	2	2	2	2	0	0	2014	1.06717	670021	2	0	0	15	2	4	5	1	2	1
1	2	2	2	2	1	0	2014	2.46118	670021	2	0	0	16	1	4	3	2	1	2
1	2	2	2	2	1	0	2014	3.00339	670021	2	0	0	16	2	4	1	2	1	1
							2014	3.00339	670021	2	1	0	16	2	4	5	2	1	1
2	2	1	2	2	1	0	2014	3.00339	670021	2	0	0	15	2	4	5	2	2	1
	1	2	2	2	1	0	2014	2.85048	670021	2	1	1	16	2	4	3	2	2	1
1	1	2	1	2	1	1	2014	6.94818	670051	2	1	0	17	2	6	5	2	1	1
2	2	2	2	2	0	0	2014	2.46884	670051	2	0	0	17	2	6	5	1	2	1
2	2	2	2	2	0	0	2014	6.94818	670051	2	0	0	16	2	6	5	2	2	1
1	2	2	2	2	1	0	2014	6.94818	670051	2	1	0	18	2	6	5	2	1	1
2	2	2	2	2	0	0	2014	5.99927	670051	2	0	0	17	1	6	5	2	2	1
1	2	2	2	2	1	0	2014	5.99927	670051	2	0	0	17	1	6	5	2	2	1
1	2	1	2	2	1	0	2014	2.13167	670051	2	0	0	17	1	6		1	1	6
2	2	1	2	2	1	0	2014	5.99927	670051	2	1	0	17	1	6	5	2	1	1
2	2	2	2	2	0	0	2014	2.59322	670021	2	0	0	14	1	4	5		2	1
1	2	2	2	2	1	0	2014	2.59322	670021	2	0	0	16	1	4	5	2	2	1
1					1		2014	2.46118	670021	2			15	1	4	3	2	2	1
2	2	2	2	2	0	0	2014	3.00339	670021	2	0	0	15	2	4	5	2	1	6
1	2	2	2	2	1	0	2014	2.59322	670021	2	0	0	15	1	4	5	2	2	1
							2014	2.46118	670021	2	0	0	14	1	4	3	2	1	1
2	2	2	2	2	0	0	2014	2.59322	670021	2	0	0	15	1	4	5	2	2	1
1	2	2	2	2	1	0	2014	2.59322	670021	2	0	0	15	1	4	5	2	2	1
2	2	2	2	2	0	0	2014	3.00339	670021	2		0	14	2	4	5	2	2	1
							2014	2.59322	670021	2	0	0	14	1	4	5	2	2	1
1	2	2	1	2	1	1	2014	2.85048	670021	2	1	1	14	2	4	3	2	1	2
2	2	2	2	2	0	0	2014	5.99927	670051	2	0	0	17	1	6	5	2	1	2
1	1	2	1	2	1	1	2014	3.52508	670051	2	0	0	17	1	5	5	2	2	1
2	2	2	2	2	0	0	2014	5.99927	670051	2	0	0	16	1	6	5	2	2	1
							2014	4.08265	670051	2	1	1	15	2	5	5	2	1	2
2	2	2	1	2	1	1	2014	5.99927	670051	2	1	1	17	1	6	5	2	1	2
2	2	2	2	2	0	0	2014	5.99927	670051	2	0	0	16	1	6	5	2	2	1
2	2	2	2	2	0	0	2014	6.94818	670051	2	0	0	17	2	6	1	2	2	1
1	2	2	2	2	1	0	2014	5.69382	670051	2	0	0	16	1	6	3	2	2	1
							2014	2.46884	670051	2		0	17	2	6	3	1	1	1
1	1	2	2	1	1	0	2014	5.99927	670051	2	1	0	17	1	6	5	2	1	7
2	2	2	2	2	0	0	2014	5.99927	670051	2	1	1	17	1	6	5	2	1	1
1			1		1	1	2014	5.69382	670051	2	0	0	19	1	6	3	2	1	1
1	1	1	2	2	1	0	2014	5.69382	670051	2	0	0	18	1	6	3	2	2	1
2	1	2	2	2	1	0	2014	5.69382	670051	2	0		17	1	6	3	2	2	1
1	2	2	2	2	1	0	2014	5.99927	670051	2	0	0	17	1	6	5	2	1	1
2	2	2	2	2	0	0	2014	6.94818	670051	2	0	0	18	2	6	6	2	1	1
1	1	2	2	2	1	0	2014	6.59442	670051	2	0	0	17	2	6	3	2	1	1
2	2	2	2	2	0	0	2014	4.08265	670051	2	1	0	16	2	5	5	2	1	1
2	1	1	2	2	1	0	2014	4.08265	670051	2	0	0	16	2	5	5	2	2	1
2		2	1	2	1	1	2014	4.08265	670051	2	1	1	15	2	5	5	2	1	1
1					1		2014	4.08265	670051	2	0	0	16	2	5	5	2	2	1
2	2	2	2	2	0	0	2014	4.08265	670051	2	0	0	17	2	5	5	2	1	1
2	2	2	2	2	0	0	2014	4.08265	670051	2	0	0	16	2	5	5	2	2	1
2	2	2	2	2	0	0	2014	1.45066	670051	2	1	0	16	2	5	5	1	1	2
1	2	2	1	2	1	1	2014	3.52508	670051	2	0	0	17	1	5	5	2	1	5
1	2	1	1	2	1	1	2014	3.52508	670051	2	0	0	15	1	5	5	2	1	1
2	2	2	2	2	0	0	2014	3.34561	670051	2	0	0	16	1	5	3	2	2	1
1	2	2	2	2	1	0	2014	3.52508	670051	2	0	0	15	1	5	5	2	2	1
2	2	2	2	2	0	0	2014	2.85048	670021	2	0	0	14	2	4	3	2	2	1
1	1	1	2	2	1	0	2014	2.59322	670021	2	1	1	15	1	4	5	2	1	3
2	2	2	2	2	0	0	2014	2.59322	670021	2	0	0	15	1	4	6	2	2	1
1	2	2	2	2	1	0	2014	2.46118	670021	2	0	0	15	1	4	3	2	1	1
2	2	1	2	2	1	0	2014	5.15704	670021	2	1	0	17	2	5	5	2	1	1
2	2	2	2	2	0	0	2014	3.00339	670021	2	0	0	16	2	4	4	2	2	1
2	2	1	2	2	1	0	2014	2.59322	670021	2	0	0	15	1	4	5	2	2	1
2	2	2	2	2	0	0	2014	2.59322	670021	2	0	0	14	1	4	5	2	2	1
1	2	2	1	2	1	1	2014	2.46118	670021	2	1		15	1	4	3	2	2	1
1	2	2	1	1	1	1	2014	3.00339	670021	2	0	0	15	2	4	5	2	2	1
2	2	2	2	2	0	0	2014	2.46118	670021	2	0	0	15	1	4	3	2	2	1
1	1	1	1	1	1	1	2014	3.00339	670021	2	1	1	15	2	4	5	2	1	7
2	2	2	2	2	0	0	2014	2.59322	670021	2	0	0	15	1	4	5	2	2	1
2	2	1		2	1		2014	3.00339	670021	2	0	0	16	2	4	5	2	1	1
2	2	2	2	2	0	0	2014	3.55825	660153	2	1	0	16	2	5	5	2	1	2
1	2	2	2	2	1	0	2014	4.2641	660153	2	0	0	16	1	5	3	2	2	1
1	1	2	1	1	1	1	2014	3.66734	660153	2	1	0	16	1	5	5	2	1	4
2	2	2	2	2	0	0	2014	3.82613	660153	2	0	0	16	2	5	5	1	1	1
2	2	2	2	2	0	0	2014	3.66734	660153	2	1	0	15	1	5	5	2	1	2
2	2	2	2	2	0	0	2014	3.55825	660153	2	0	0	15	2	5	2	2	2	1
2	2	2	2	2	0	0	2014	3.55825	660153	2	0	0	15	2	5	5	2	2	1
1	2	2	1	2	1	1	2014	3.57195	660153	2	0	0	16	1	4	5	2	1	1
1	2	2	2	2	1	0	2014	3.57195	660153	2	1	1	15	1	4	5	2	1	3
1	2	2	1	2	1	1	2014	3.57195	660153	2	0	0	15	1	4	2	2	2	1
2	2	2	2	2	0	0	2014	3.57195	660153	2	0	0	14	1	4	5	2	2	1
2	2	2	2	2	0	0	2014	3.57195	660153	2	0	0	14	1	4	5	2	2	1
2	2	1	1	1	1	1	2014	3.46571	660153	2	1	1	15	2	4	5	2	2	1
2	1	2	1	2	1	1	2014	3.57195	660153	2	1	0	14	1	4	5	2	1	2
2	2	2	2	2	0	0	2014	3.46571	660153	2	0	0	14	2	4	5	2	2	1
1	2	2	2	2	1	0	2014	3.46571	660153	2	1	0	14	2	4	5	2	1	1
2	2	2	2	2	0	0	2014	3.66734	660153	2	1	0	15	1	5	5	2	1	1
2	2	2	2	2	0	0	2014	3.55825	660153	2	1	1	16	2	5	5	2	1	7
2	2	2	2	2	0	0	2014	3.55825	660153	2	1	1	16	2	5	5	2	1	1
2	2	2	2	2	0	0	2014	3.55825	660153	2	1	0	16	2	5	5	2	1	1
1	1	1	1	2	1	1	2014	3.66734	660153	2	0	0	17	1	5	6	2	1	1
2	2	2	2	2	0	0	2014	3.66734	660153	2	1	1	16	1	5	5	2	2	1
2	2	2	2	2	0	0	2014	3.55825	660153	2	0	0	16	2	5	5	2	2	1
1	2	2	1	2	1	1	2014	3.46571	660153	2	1	1	15		4	5	2	1	7
							2014	3.46571	660153	2	0	0	15	2	4	5	2	2	1
2	2	2	2	2	0	0	2014	3.46571	660153	2	0	0	15	2	4	6	2	2	1
2	2	2	2	2	0	0	2014	3.72662	660153	2	1	0	15	2	4	6	1	1	1
2	2	2	2	2	0	0	2014	3.57195	660153	2	1	1	14	1	4	5	2	2	1
							2014	3.72662	660153	2	1	1	15	2	4	6	1	1	2
2	2	2	1	2	1	1	2014	4.02966	660153	2	0	0	15	2	4	3	2	2	1
1	2	2	2	2	1	0	2014	5.36202	660153	2	1	0	17	2	6	5	2	1	1
2	2	2	2	2	0	0	2014	5.36202	660153	2	1	0	17	2	6	5	2	2	1
2	2	2	2	2	0	0	2014	5.5264	660153	2	0	0	17	1	6	5	2	2	1
2	2	2	1	2	1	1	2014	5.94245	660153	2	1	1	17	1	6	5	1	1	1
1	2	2	1	2	1	1	2014	5.5264	660153	2	0	0	16	1	6	5	2	2	1
2	2	2	2	2	0	0	2014	3.57195	660153	2	1	0	15	1	4	5	2	1	1
2	2	2	2	2	0	0	2014	3.55825	660153	2	0	0	16	2	5	5	2	2	1
2	2	2	2	2	0	0	2014	5.94245	660153	2	0	0	17	1	6	6	1	2	1
2	2	2	1	2	1	1	2014	5.5264	660153	2	1	0	16	1	6	5	2	2	1
2	2	2	2	2	0	0	2014	5.36202	660153	2	0	0	16	2	6	5	2	2	1
2	2	2	2	2	0	0	2014	3.55825	660153	2	0	0	16	2	5	5	2	2	1
2	2	2	2	2	0	0	2014	5.36202	660153	2	0	0	17	2	6	4	2	1	1
2	2	1	2	2	1	0	2014	5.36202	660153	2	0	0	17	2	6	5	2	1	1
2	2	2	2	2	0	0	2014	5.5264	660153	2	1	1	17	1	6	5	2	1	1
2	2	2	1	2	1	1	2014	5.5264	660153	2	1	0	16	1	6	5	2	1	1
							2014	5.14459	660153	2	1	1	17	2	7	5	2	1	2
2	2	2	2	2	0	0	2014	3.46571	660153	2	0	0	14	2	4	5	2	1	1
2	2	2	2	2	0	0	2014	5.30231	660153	2	1	1	18	1	7	5	2	1	2
							2014	5.70149	660153	2	0	0	18	1	7	6	1	2	1
2	2	2	2	2	0	0	2014	5.30231	660153	2	0	0	17	1	7	5	2	2	1
2	2	2	2	2	0	0	2014	5.14459	660153	2	0	0	18	2	7	5	2	2	1
2	2	1	2	2	1	0	2014	5.5264	660153	2	0	0	17	1	6	5	2	2	1
1	1	2	1	2	1	1	2014	5.5264	660153	2	0	0	16	1	6	5	2	2	1
2	2	2	2	2	0	0	2014	5.5264	660153	2	0	0	16	1	6	5	2	2	1
1	2	2	2	2	1	0	2014	5.36202	660153	2	1	1	17	2	6	2	2	2	1
2	2	2	2	2	0	0	2014	5.36202	660153	2	0	0	17	2	6	5	2	2	1
2	2	2	2	2	0	0	2014	5.36202	660153	2	1	1	16	2	6	5	2	2	1
2	2	2	2	2	0	0	2014	5.14459	660153	2	0	0	18	2	7	5	2	2	1
2	2	2	2	2	0	0	2014	5.30231	660153	2	0	0	17	1	7	5	2	2	1
1	2	2	2	2	1	0	2014	5.14459	660153	2	1	0	18	2	7	5	2	1	7
2	2	2	2	2	0	0	2014	5.30231	660153	2	0	0	18	1	7	5	2	2	1
2	2	2	2	2	0	0	2014	5.30231	660153	2	1	1	18	1	7	5	2	1	6
1	2	2	1	2	1	1	2014	5.30231	660153	2	1	0	18	1	7	5	2	2	1
2	2	2	2	2	0	0	2014	5.14459	660153	2	0	0	16	2	7	5	2	2	1
2	2	2	2	2	0	0	2014	3.84087	660271	2	0	0	14	1	4		1	1	1
1	1	1	1		1	1	2014	5.5319	660271	2		0	14	2	7	3	1		7
2	2	2	2	2	0	0	2014	4.1532	660271	2	0	0	15	1	4	3	2	2	1
2	2	2	2	2	0	0	2014	3.84087	660271	2	0	0	15	1	4	3	1	2	1
2	2	2	2	2	0	0	2014	3.57195	660271	2	0	0	15	1	4	5	2	2	1
2	2	2	2	2	0	0	2014	3.57195	660271	2	0	0	15	1	4	5	2	2	1
2	2	2	2	2	0	0	2014	4.1532	660271	2	0	0	14	1	4	3	2	2	1
1	1	2	2	2	1	0	2014	3.84087	660271	2	0	0	15	1	4	6	1	1	1
2	2	2	2	2	0	0	2014	3.46571	660271	2	0	0	15	2	4	5	2	1	1
2	2	2	2	2	0	0	2014	5.98174	660271	2	0	0	18	2	7	3	2	1	1
1	2	2	2	2	1	0	2014	3.55825	660271	2	0	0	15	2	5	5	2	2	1
							2014	3.66734	660271	2	0	0	17	1	5	6	2	2	1
1	2	2	2	2	1	0	2014	3.66734	660271	2	0	0	16	1	5	5	2	1	1
2	2	2	2	2	0	0	2014	3.55825	660271	2	0	0	16	2	5	5	2	2	1
2	2	2	2	2	0	0	2014	3.55825	660271	2	0	0	15	2	5	6	2	2	1
2	2	2	2	2	0	0	2014	3.66734	660271	2	1	0	15	1	5	5	2	1	1
1	2	1	2	2	1	0	2014	3.55825	660271	2	0	0	16	2	5	5	2	2	1
1	2	2	1	2	1	1	2014	3.66734	660271	2	0	0	16	1	5	5	2	1	1
2	1	2	2	2	1	0	2014	3.66734	660271	2	0	0	15	1	5	5		1	1
2	2	2	2	2	0	0	2014	3.55825	660271	2	0	0	16	2	5	5	2	2	1
2	2	2	2	2	0	0	2014	3.84087	660271	2	0	0	15	1	4	6	1	2	1
1	1	1	2	2	1	0	2014	3.55825	660271	2	1	0	16	2	5	5	2	1	6
1	1	1	1	2	1	1	2014	3.46571	660271	2	0	0	16	2	4	5	2	2	1
2	1	2	2	2	1	0	2014	4.02966	660271	2	1	0	16	2	4	3	2	1	1
2	2	2	2	2	0	0	2014	3.57195	660271	2	0	0	14	1	4	5	2	1	1
2	2	2	1	2	1	1	2014	3.57195	660271	2	0	0	14	1	4	5	2	1	1
1	2	1	2	2	1	0	2014	3.57195	660271	2	0	0	15	1	4	5	2	2	1
1	2	2	2	2	1	0	2014	3.46571	660271	2	0	0	15	2	4	5	2	1	1
2	2	2	2	2	0	0	2014	3.57195	660271	2	0	0	15	1	4	5	2		1
2	2	2	2	2	0	0	2014	4.02966	660271	2	0	0	14	2	4	3	2	2	1
1	2	2	2	2	1	0	2014	4.1532	660271	2	0	0	15	1	4	3	2	1
1	2	2	2	1	1	0	2014	3.57195	660271	2	0	0	15	1	4	5	2	1	4
2	2	2	2	2	0	0	2014	5.36202	660271	2	0	0	16	2	6	5	2	2	1
1	1				1		2014	4.2641	660271	2	0	0	16	1	5	3	2	1
1	2	2	2	2	1	0	2014	3.46571	660271	2	0	0	15	2	4	5	2	1	5
1	1	2	2	2	1	0	2014	3.46571	660271	2	0	0	14	2	4	5		2	1
2	2	2	2	2	0	0	2014	3.57195	660271	2	0	0	15	1	4	5	2	2	1
1	2	2	1	2	1	1	2014	3.57195	660271	2	1	0	16	1	4	5	2	1	1
2	2	2	2	2	0	0	2014	3.57195	660271	2	0	0	14	1	4	5	2	2	1
1	2	2	1	2	1	1	2014	3.46571	660271	2	1	0	15	2	4	5	2	1	1
2	2	2	1	2	1	1	2014	5.5264	660271	2	0	0	16	1	6	5	2	2	1
2	2	2	2	2	0	0	2014	3.55825	660271	2	0	0	16	2	5	5	2	2	1
2	2	2	2	2	0	0	2014	5.14459	660271	2	0	0	17	2	7	5	2	1	1
1	2	2	1	2	1	1	2014	4.2641	660153	2	1	1	16	1	5	3	2	2	1
1	1	1	1	1	1	1	2014	5.14459	660153	2	1	1	18	2	7	5	2	1	7
2	2	2	2	2	0	0	2014	5.14459	660153	2	1	1	18	2	7	5	2	2	1
1	2	2	2	2	1	0	2014	5.14459	660153	2	0	0	17	2	7	5	2	2	1
1	1				1		2014	3.84087	660153	2	0	0	15	1	4	6	1	1	1
2	2	2	2	2	0	0	2014	3.55825	660153	2	1	1	15	2	5	5	2	1	1
2	2	2	2	2	0	0	2014	3.66734	660153	2	1	0	16	1	5	5	2	2	1
2	2	2	2	2	0	0	2014	4.13727	660153	2	0	0	15	2	5	3	2	2	1
2	1	2	2	2	1	0	2014	3.55825	660153	2	0	0	16	2	5	5	2	1	1
1	2	2	2	2	1	0	2014	3.55825	660153	2	0	0	16	2	5	5	2	2	1
2	2	2	1	2	1	1	2014	3.66734	660153	2	1	1	15	1	5	5	2	2	1
1	2	2	2	2	1	0	2014	3.66734	660153	2	0	0	16	1	5	5	2	2	1
1	1	2	2	2	1	0	2014	3.94343	660153	2	0	0	16	1	5	5	1	2	1
2	2	2	2	2	0	0	2014	3.66734	660153	2	0	0	15	1	5	5	2	2	1
2	2	2	2	2	0	0	2014	3.66734	660153	2	1	0	16	1	5	5	2	1	1
2	2	2	2	2	0	0	2014	3.66734	660153	2	1	1	15	1	5	5	2	1	2
1	2	2	1	2	1	1	2014	3.57195	660153	2	1	1	15	1	4	5	2	1	5
2	2	2	2	2	0	0	2014	3.46571	660153	2	0	0	14	2	4	5	2	2	1
							2014	3.55825	660153	2	0	0	17	2	5	5	2	2	1
2	2	2	2	2	0	0	2014	4.13727	660153	2	1	1	15	2	5	3	2	1	3
2	1	2	2	2	1	0	2014	3.55825	660153	2	1	0	16	2	5	5	2	1	1
1	2	2	1	2	1	1	2014	3.46571	660153	2	0	0	15	2	4	5	2	2	1
1	2	2	2	2	1	0	2014	3.57195	660153	2	0	0	15	1	4	5	2	2	1
2	2	2	2	2	0	0	2014	3.46571	660153	2	1	1	15	2	4	5	2	2	1
2	2	2	2	2	0	0	2014	3.72662	660153	2	0	0	15	2	4	6	1	2	1
2	2	2	2	2	0	0	2014	3.57195	660153	2	1	1	15	1	4	5	2	2	1
1	2	2	1	2	1	1	2014	3.46571	660153	2	1	1	14	2	4	1	2	1	1
1	2	2	1	2	1	1	2014	3.57195	660153	2	0	0	15	1	4	5	2	2	1
1			1	1	1	1	2014	3.46571	660153	2	1	1	15	2	4	5	2	1	6
1	1	2	2	2	1	0	2014	3.57195	660153	2	1	1	15	1	4	5	2	1	4
2	2	1	2	2	1	0	2014	3.46571	660153	2	1	1	15	2	4	5	2	1	1
2	2	2	2	2	0	0	2014	5.30231	660153	2	1	1	17	1	7	5	2	1	4
2	2	2	2	1	1	0	2014	6.42568	660153	2	1	1	16	1	6	3	2	1	1
1	1	2	1	2	1	1	2014	3.55825	660153	2	1	1	17	2	5	5	2	1	1
2	2	2	2	2	0	0	2014	3.46571	660153	2	0	0	15	2	4	5	2	2	1
2	1	2	2	2	1	0	2014	3.72662	660153	2	0	0	16	2	4	6	1	1	1
2	2	2	2	2	0	0	2014	3.57195	660153	2	0	0	15	1	4	5	2	2	1
2	2	2	2	2	0	0	2014	3.46571	660153	2	0		14	2	4	5	2	2	1
2	2	2	1	2	1	1	2014	3.57195	660153	2	1	1	15	1	4	5	2	1	2
2	2	2	2	2	0	0	2014	3.57195	660153	2	0	0	14	1	4	5	2	2	1
2	2	2	2	2	0	0	2014	3.46571	660153	2	1	1	15	2	4	5	2	1	1
1	2	2	2	2	1	0	2014	3.46571	660153	2	0	0	14	2	4	5	2	1	1
1					1		2014	3.57195	660153	2	1	1	14	1	4	5	2	2	1
2	2	2	2	2	0	0	2014	4.1532	660153	2	0	0	14	1	4	3	2	2	1
1	2	2	2	2	1	0	2014	3.57195	660153	2	0	0	14	1	4	5	2	2	1
1	2	2	2	2	1	0	2014	3.57195	660153	2	0	0	14	1	4	5	2	2	1
2	2	2	2	2	0	0	2014	3.57195	660153	2	0	0	14	1	4	5	2	2	1
1	2	2	2	2	1	0	2014	3.57195	660153	2	0	0	14	1	4	5	2	2	1
1	1	2	1	2	1	1	2014	3.46571	660153	2		0	16	2	4	5	2	2	1
2	2	2	1	2	1	1	2014	3.46571	660153	2	1	1	14	2	4	5	2	2	1
1	2	1	2	1	1	0	2014	3.46571	660153	2	1	1	15	2	4	5	2	1	1
2	2	2	2	2	0	0	2014	5.30231	660271	2	0	0	17	1	7	5	2	1	1
2	2	2	2	2	0	0	2014	5.14459	660271	2	1	0	17	2	7	5	2	1	1
2	2	2	2	2	0	0	2014	5.14459	660271	2	0	0	17	2	7	5	2	1	1
2	2	2	2	2	0	0	2014	5.14459	660271	2	0	0	17	2	7	5	2	1	1
2	1	2	2	2	1	0	2014	5.70149	660271	2	0	0	18	1	7	6	1	2	1
2	2	2	2	2	0	0	2014	5.30231	660271	2	1	0	17	1	7	5	2	1	3
2	2	2	2	2	0	0	2014	5.14459	660271	2	0	0	18	2	7	6	2	2	1
2	2	1	2	2	1	0	2014	5.36202	660271	2	0	0	17	2	6	5	2	2	1
2	2	2	2	2	0	0	2014	5.14459	660271	2	0	0	17	2	7	5	2	2	1
1	2	1	1	2	1	1	2014	5.5264	660271	2	1	1	17	1	6	5	2	1	2
							2014	5.14459	660271	2			17	2	7	5	2	2	1
1	2	2	2	2	1	0	2014	3.55825	660271	2	0	0	14	2	5	5	2	2	1
1	2	2	2	2	1	0	2014	5.98174	660271	2	0	0	18	2	7	3	2	1	1
1	1	2	2	2	1	0	2014	6.42568	660271	2	0	0	17	1	6	3	2	1	1
1	1	2	2	2	1	0	2014	3.46571	660271	2	0	0	14	2	4	5	2	2	1
1	2	1	2	2	1	0	2014	3.66734	660271	2	1		16	1	5	5	2	1	3
							2014	3.66734	660271	2	0	0	15	1	5	5	2	2	1
2	2	2	2	2	0	0	2014	5.36202	660271	2	0	0	17	2	6	5	2	2	1
2	2	2	2	2	0	0	2014	3.55825	660271	2	0	0	15	2	5	2	2	2	1
1	2	2	2	2	1	0	2014	3.66734	660271	2	0	0	15	1	5	6	2	2	1
2	2	2	2	2	0	0	2014	5.5264	660271	2	0	0	16	1	6	5	2	2	1
							2014	3.55825	660271	2	0	0	15	2	5	5	2	2	1
1	2	2	2	2	1	0	2014	5.5319	660271	2	0	0	17	2	7	6	1	1	1
2	2	2	2	2	0	0	2014	5.5264	660271	2	0	0	16	1	6	5	2	1	1
2	2	2	2	2	0	0	2014	3.57195	660271	2	0	0	14	1	4	5	2	2	1
1	2	2	2	2	1	0	2014	3.55825	660271	2	0	0	16	2	5	5	2	2	1
1					1		2014	3.55825	660271	2	0	0	17		5	5	2	2	1
1	2	2	2	2	1	0	2014	5.36202	660271	2	0	0	17	2	6	6	2	2	1
2	2	2	2	2	0	0	2014	3.55825	660271	2	0	0	16	2	5	5	2	2	1
1	2	2	2	2	1	0	2014	3.57195	660271	2	0	0	15	1	4	5	2	2	1
2	2	2	2	2	0	0	2014	6.23455	660271	2	0	0	18	2	6	3	2	1	1
1	2	1	2	2	1	0	2014	5.36202	660271	2	0	0	18	2	6	5	2	1	2
2	2	2	2	2	0	0	2014	6.42568	660271	2	0	0	17	1	6	3	2	2	1
2	2	2	2	2	0	0	2014	3.66734	660271	2	0	0	17	1	5	6	2	1	1
							2014	5.5264	660271	2	0	0	17		6	5	2	2	1
2	2	2	2	2	0	0	2014	5.5264	660271	2	0	0	17	1	6	5	2	2	1
1	2	2	2	2	1	0	2014	3.46571	660271	2	1	0	21	2	4	5	2	1	7
2	2	2	2	2	0	0	2014	3.57195	660271	2	0	0	15	1	4	5	2	2	1
							2014	3.46571	660271	2	1	1	14	2	4	5	2	1	7
2	2	1	2	2	1	0	2014	3.46571	660271	2	0	0	15	2	4	5	2	2	1
2	2	2	2	2	0	0	2014	3.46571	660271	2	0	0	14	2	4	5	2	2	1
2	2	2	2	2	0	0	2014	3.72662	660271	2	0	0	16		4	6	1	2	1
2	2	1	2	2	1	0	2014	3.46571	660271	2	0	0	15	2	4	5	2	2	1
2	2	2	2	2	0	0	2014	3.46571	660271	2	0	0	14	2	4	5	2	2	1
2	2	2	2	2	0	0	2014	3.84087	660271	2	0	0	14	1	4	6	1	2	1
2	2	2	2	2	0	0	2014	3.46571	660271	2	0	0	16	2	4	5	2	2	1
1	2	2	2	2	1	0	2014	3.57195	660271	2	0	0	14	1	4	5	2	2	1
2	2	2	2	2	0	0	2014	4.02966	660271	2	0	0	16	2	4	3	2	2	1
1	2	2	2	2	1	0	2014	3.55825	660271	2	0	0	15	2	5	5	2	1	2
1	1	2	1	2	1	1	2014	3.46571	660271	2	0	0	15	2	4	5	2	2	1
2	2	1	2	2	1	0	2014	3.66734	660271	2	0	0	16	1	5	5	2	2	1
2	2	1	2	2	1	0	2014	3.46571	660271	2	1	0	14	2	4	5	2	1	1
2	2	2	2	2	0	0	2014	6.55358	660141	2	0	0	16	2	6	5	2	2	1
2	2	1	2	2	1	0	2014	6.55358	660141	2	0	0	17	2	6	5	2	2	1
2	2	2	2	2	0	0	2014	6.55358	660141	2	0	0	17		6	5	2	2	1
2	2	2	1	2	1	1	2014	6.55358	660141	2	0	0	19		6	5	2	2	1
1	2	2	2	2	1	0	2014	6.55358	660141	2	1	1	16	2	6	5	2	1	1
1	2	2	2	2	1	0	2014	6.75449	660141	2	1	0	17	1	6	5	2	1	1
2	2	2	2	2	0	0	2014	6.75449	660141	2	1	0	16	1	6	5	2	1	3
2	2	2	2	2	0	0	2014	7.04696	660141	2	0	0	18	2	6		1	2	1
1	2	2	2	2	1	0	2014	6.55358	660141	2	0	0	16	2	6	5	2	2	1
2	2	2	2	2	0	0	2014	4.67639	660141	2	0	0	16	2	5	5	1	1	2
1	2	2	2	1	1	0	2014	4.4823	660141	2	0	0	15	1	5	5	2	1	1
2	2	2	2	2	0	0	2014	4.36572	660141	2	0	0	15	1	4	5	2	1	1
2	2	2	2	2	0	0	2014	4.36572	660141	2	0	0	15	1	4	5	2	2	1
2	2	2	2	2	0	0	2014	4.23586	660141	2	0	0	15	2	4	5	2	2	1
2	2	1	2	2	1	0	2014	4.23586	660141	2	0		14	2	4	5	2	2	1
2	2	2	2	2	0	0	2014	4.23586	660141	2		0	15	2	4	5	2	2	1
2	2	2	2	2	0	0	2014	4.36572	660141	2	0	0	14	1	4	5	2	1	1
2	2	2	2	2	0	0	2014	4.36572	660141	2	1	0	15	1	4	5	2	2	1
1	1	2	1	2	1	1	2014	4.36572	660141	2	0	0		1	4	5	2	2
1	2	1	2	2	1	0	2014	4.23586	660141	2	0		14	2	4	6	2	2	1
2	2	2	2	2	0	0	2014	6.28783	660141	2	0	0	19	2	7	5	2	2	1
							2014	6.28783	660141	2	0	0	17	2	7	5	2	1	1
2	2	2	2	2	0	0	2014	6.4806	660141	2	0	0	17	1	7	5	2	2	1
1	2	2	2	2	1	0	2014	4.34898	660141	2	0	0	15	2	5	5	2	2	1
2	2	2	2	2	0	0	2014	4.81975	660141	2	0	0	15	1	5	6	1	2	1
1	2	1	2	2	1	0	2014	4.4823	660141	2	1	1	16	1	5	5	2	1	1
2	2	2	2	2	0	0	2014	4.36572	660141	2	0	0	15	1	4	5	2	2	1
2	2	2	2	2	0	0	2014	6.75449	660141	2	0	0	17	1	6	5	2	1	1
2	2	1	2	2	1	0	2014	4.36572	660141	2	0	0	15	1	4	5	2	2	1
2	2	1	2	2	1	0	2014	4.23586	660141	2	1	1	14	2	4	5	2	1	1
2	2	2	2	2	0	0	2014	4.36572	660141	2	0	0	14	1	4	5	2	2	1
2	2	2	2	2	0	0	2014	4.36572	660141	2	0	0	14	1	4	5	2	1	1
2	2	2	1	2	1	1	2014	6.28783	660141	2	1	1	19	2	7	5	2	1	1
2	2	2	2	2	0	0	2014	6.75449	660141	2	0	0	17	1	6	5	2	2	1
2	2	2	2	2	0	0	2014	6.4806	660141	2	1	1	18	1	7	5	2	1	6
1	2	2	2	2	1	0	2014	6.28783	660141	2	1	1	17	2	7	5	2	1	1
1	2	2	2	2	1	0	2014	6.75449	660141	2	0	0	16	1	6	5	2	2	1
2	2	2	2	2	0	0	2014	6.4806	660141	2	0	0	18	1	7	5	2	1	1
1	2	2	2	2	1	0	2014	6.28783	660141	2	1	1	19	2	7	5	2	1	7
2	2	2	2	2	0	0	2014	3.57195	660271	2	0	0	14	1	4	5	2	2	1
2	2	2	2	2	0	0	2014	3.57195	660271	2	0	0	14	1	4	5	2	2	1
2	2	2	2	2	0	0	2014	3.57195	660271	2	0	0	15	1	4	6	2	1	6
2	2	2	2	2	0	0	2014	4.1532	660271	2	1	1	16	1	4	3	2	1	1
1	2	2	2	2	1	0	2014	5.76569	660271	2	0	0	17	2	6	5	1	2	1
							2014	3.57195	660271	2	0	0	16	1	4	5		2	1
2	2	2	2	2	0	0	2014	5.14459	660153	2	0	0	18	2	7	5	2	1	1
2	2	2	2	1	1	0	2014	5.30231	660153	2	1	0	18	1	7	5	2	1	1
2	1	2	2	2	1	0	2014	5.14459	660153	2	0	1	18	2	8	6	2	1	7
2	2	2	2	2	0	0	2014	5.70149	660153	2	0	0	18	1	7	6	1	2	1
2	2	1	2	2	1	0	2014	5.14459	660153	2	1	1	18	2	7	5	2	1	2
1	2	1	1		1	1	2014	7.27364	660101	2	0	0	16	2	6	3	2	1	1
1		2	2	1	1	0	2014	6.25569	660101	2	0	0	17	2	6	5	2	2	6
							2014	6.72664	660101	2	1		16	2	6		1	2	1
2	2	2	2	2	0	0	2014	6.44747	660101	2	0	0	16	1	6	5	2	2	1
1	1	1	1	1	1	1	2014	6.25569	660101	2	1	1	17	2	6	5	2	1	7
1	1	1	1	1	1	1	2014	6.25569	660101	2	1	1	18	2	6		2	1	3
2	2	2	2	2	0	0	2014	6.25569	660101	2	0	0	18	2	6	5	2	2	1
2	2	2	2	2	0	0	2014	5.14459	660153	2	1	1	17	2	7	5	2	1	1
1	1	1	2	2	1	0	2014	5.36202	660153	2		1	18	2	6	5	2	1	1
1	2	2	2	2	1	0	2014	5.76569	660153	2	0	0	17	2	6	5	1	2	1
							2014	5.36202	660153	2	0	0	16	2	6	5	2	1	1
1	1	2	1	1	1	1	2014	5.5264	660153	2	0	0	18	1	6	5	2	1	2
1	2	2	1	2	1	1	2014	5.5264	660153	2	0	0	16	1	6	5	2	2	1
2	2	2	2	2	0	0	2014	5.5264	660153	2	1	0	17	1	6	5	2	2	1
1	2	2	2	2	1	0	2014	5.36202	660153	2	1	1	16	2	6	5	2	1	3
1	2	1	2	2	1	0	2014	5.5264	660153	2	0	0	16	1	6	5	2	1	1
1	2	2	2	2	1	0	2014	5.36202	660153	2	1	1	17	2	6	5	2	1	2
1	2	2	2	2	1	0	2014	4.27856	660101	2	0	0	16	1	5	5	2	2	1
2	2	2	1	2	1	1	2014	4.27856	660101	2	0	0	15	1	5	5	2	2	1
1	1	1	1	1	1	1	2014	4.1513	660101	2	1	1	15	2	5	5	2	1	4
							2014	4.1513	660101	2	1	0	15	2	5	5	2	1	1
1	1	2	2	2	1	0	2014	4.16728	660101	2	1	0	15	1	4	5	2	1	1
							2014	4.27856	660101	2	1	0	15	1	5	5	2	1	2
2	2	1	2	2	1	0	2014	4.27856	660101	2	0	0	15	1	5	5	2	2	1
1	1	1	1	1	1	1	2014	4.16728	660101	2	1	1	14	1	4	6	2	1	5
		1			1		2014	4.1513	660101	2	0	0	16	2	5	5	2	1	1
2	2	2	2	2	0	0	2014	4.1513	660101	2	1	0	15	2	5	5	2	1	1
2	2	1	2	2	1	0	2014	4.27856	660101	2	0	0	15	1	5	5	2	2	1
2	2	1	2	2	1	0	2014	3.66734	661110	2	0	0	15	1	5	5	2	2	1
2	2	2	2	2	0	0	2014	3.55825	661110	2	0	0	15	2	5	5	2	2	1
2	2	2	2	2	0	0	2014	3.46571	661110	2	0	0	14	2	4	5	2	2	1
2	2	2	2	2	0	0	2014	3.66734	661110	2	0	0	16	1	5	5	2	2	1
1	2	2	2	2	1	0	2014	3.55825	661110	2	0	0	16	2	5	5	2	2	1
2	2	2	2	2	0	0	2014	3.55825	661110	2	1	0	15	2	5	2	2	2	1
2	2	2	2	2	0	0	2014	3.57195	661110	2	0	0	14	1	4	5	2	2	1
2	2	2	2	2	0	0	2014	4.2641	661110	2	1	1	16	1	5	3	2	2	1
2	2	2	2	2	0	0	2014	3.46571	661110	2	1	0	14	2	4	5	2	1	1
2	2	2	2	2	0	0	2014	3.57195	661110	2	0	0	14	1	4	5	2	2	1
1	2	1	2	2	1	0	2014	6.55358	660141	2	1	0	16	2	6	5	2	1	1
2	2	2	2	2	0	0	2014	6.55358	660141	2	0	0	16	2	6	5	2	2	1
2	2	2	2	2	0	0	2014	6.75449	660141	2	0	0	16	1	6	5	2	2	1
2	1	2	2	2	1	0	2014	4.34898	660141	2	0	0	15	2	5	5	2	2	1
1	2	1	1	2	1	1	2014	6.75449	660141	2	1	0	17	1	6	5	2	2	1
1	2	2	1	2	1	1	2014	6.28783	660141	2	0	0	17	2	7	5	2	2	1
2	2	2	2	2	0	0	2014	4.34898	660141	2	0	0	15	2	5	5	2	2	1
2	2	2	2	2	0	0	2014	3.46571	661110	2	0	0	14	2	4	5	2	2	1
2	2	2	2	2	0	0	2014	3.84087	661110	2	0	0	14	1	4	6	1	2	1
1	2	2	1	2	1	1	2014	3.57195	661110	2	0	0	15	1	4	5	2	2	1
2	2	2	2	2	0	0	2014	3.57195	661110	2	0	0	15	1	4	5	2	2	1
2	2	2	2	2	0	0	2014	3.66734	661110	2	0	0	15	1	5	5	2	2	1
2	2	2	2	2	0	0	2014	3.46571	661110	2	0	0	14	2	4	5	2	2	1
2	2	2	2	2	0	0	2014	3.55825	661110	2	0	0	16	2	5	6	2	2	1
1	2	2	1	2	1	1	2014	6.28783	660141	2	0	0	18	2	7	5	2	1	1
1	2	1	1	2	1	1	2014	6.28783	660141	2	1	0	18	2	7	5	2	1	1
2	2	2	2	2	0	0	2014	6.28783	660141	2	0	0	18	2	7	5	2	2	1
1	2	2	2	2	1	0	2014	6.28783	660141	2	1	0	17	2	7	5	2	1	1
2	2	2	2	2	0	0	2014	6.4806	660141	2	0	0	17	1	7	5	2	1	7
2	2	2	2	2	0	0	2014	3.46571	661110	2	0	0	15	2	4	5	2	2	1
1	2	2	1	2	1	1	2014	3.46571	661110	2	0	0	14	2	4	5	2	2	1
2	2	2	2	2	0	0	2014	3.46571	661110	2	0	0	14	2	4	5	2	2	1
1	2	2	1	2	1	1	2014	3.57195	661110	2	0	0	15	1	4	5	2	2	1
							2014	3.66734	661110	2	0	0	16	1	5	5	2	2	1
2	2	2	2	2	0	0	2014	3.57195	661110	2	0	0	14	1	4	5	2	1	1
1	2	2	1	2	1	1	2014	3.57195	661110	2	0	0	14	1	4	5	2	2	1
1	2	1	2	2	1	0	2014	3.46571	661110	2	0	0	15	2	4	5	2	2	1
2	2	2	2	2	0	0	2014	3.72662	661110	2	0	0	15	2	4	6	1	2	1
2	2	2	2	2	0	0	2014	3.46571	661110	2	0	0	14	2	4	5	2	2	1
2	2	2	2	2	0	0	2014	3.46571	661110	2	0	0	15	2	4	5	2	2	1
2	2	2	2	2	0	0	2014	3.57195	661110	2	0	0	14	1	4	5	2	2	1
2	2	2	2	2	0	0	2014	3.46571	661110	2	0	0	14	2	4	5	2	2	1
1	2	2	1	2	1	1	2014	4.34898	660141	2	1	1	17	2	5	5	2	1	7
2	2	2	2	2	0	0	2014	5.05666	660141	2	0	0	16	2	5	3	2	2	1
2	2	2	2	2	0	0	2014	4.67639	660141	2	1	1	15	2	5	6	1	2	1
1	1	1	1	1	1	1	2014	6.28783	660141	2	1	1	21	2	7	5	2	1	7
1	1	2	2	2	1	0	2014	4.34898	660141	2	0	0	16	2	5	1	2	2	1
							2014	4.34898	660141	2	1	0	17	2	5	5	2	1	5
2	2	2	2	2	0	0	2014	4.23586	660141	2	0	0	15	2	4	5	2	2	1
2	1	1	1	2	1	1	2014	4.23586	660141	2	1	1	16	2	4	5	2	1	1
2	2	2	2	2	0	0	2014	4.23586	660141	2	1	1	14	2	4	5	2	1	1
1	2	2	2	2	1	0	2014	4.34898	660141	2	0	0	15	2	5	5	2	2	1
2	2	2	2	1	1	0	2014	4.23586	660141	2	0	0	15	2	4	5	2	2	1
2	2	2	2	2	0	0	2014	4.34898	660141	2	0	0	15	2	5	5	2	2	1
1	1	1	1	1	1	1	2014	6.28783	660141	2	0	0	18	2	7	5	2	1	1
2	2	2	2	2	0	0	2014	3.46571	660153	2	0	0	16	2	4	5	2	2	1
1	2	2	2	2	1	0	2014	6.25569	660101	2	0		15	2	6	5	2	2
2	2	2	2	2	0	0	2014	6.44747	660101	2	0	0	17	1	6	5	2	2	1
2	2	2	2	2	0	0	2014	5.76569	660153	2	0	0	18	2	6	6	1	1	1
2	2	2	2	2	0	0	2014	5.5264	660153	2	0	0	16	1	6	5	2	1	1
2	2		2	1	1	0	2014	5.36202	660153	2	1	0	17	2	6	5	2	2	1
1	2	2	1	2	1	1	2014	5.5264	660153	2	1	1	17	1	6	5	2	1	5
2	2	2	2	2	0	0	2014	5.5264	660153	2	0	0	17	1	6	5	2	2	1
2	2	2	2	2	0	0	2014	5.5264	660153	2	0	0	17	1	6	5	2	2	1
1	2	2	2	2	1	0	2014	5.36202	660153	2	1	1	17	2	6	5	2	1	1
2	2	2	1	2	1	1	2014	3.55825	660153	2	0	0	15	2	5	5	2	2	1
1	2	2	2	2	1	0	2014	3.66734	660153	2	0	0	16	1	5	5	2	2	1
1	2	2	2	2	1	0	2014	3.55825	660153	2	1	1	17	2	5	5	2	1	1
1	2	2	2	1	1	0	2014	3.55825	660153	2	1	1	15	2	5	5	2	2	1
2	2	2	2	2	0	0	2014	4.46382	660101	2	1	1	15	2	5	3	1	2	7
2	2	2	2	2	0	0	2014	6.25569	660101	2	0	0	16	2	6	5	2	2	1
1	1	1	2	2	1	0	2014	3.46571	660271	2	0	0	14	2	4	5	2	2	1
1	2	2	2	2	1	0	2014	3.46571	660271	2	0	0	15	2	4	5	2	2	1
2	2	2	2	2	0	0	2014	3.46571	660271	2	0	0	15	2	4	5	2	2	1
2	2	2	2	2	0	0	2014	3.55825	660271	2	0	0	16	2	5	5	2	2	1
2	2	1	2	2	1	0	2014	3.46571	660271	2	0	0	14	2	4	5	2	2	1
1	2	2	2	2	1	0	2014	3.57195	660271	2	0	0	15	1	4	5	2	1	1
1	2	2	1	2	1	1	2014	3.66734	660271	2	0	0	15	1	5	5	2	2	1
2	2	2	2	2	0	0	2014	4.2641	660271	2	0	0	16	1	5	3	2	1	4
2	2	2	2	2	0	0	2014	3.66734	660271	2	0	0	15	1	5	5	2	2	1
1	2	2	1	2	1	1	2014	5.36202	660271	2	0	0	16	2	6	2	2	2	1
1	1	2	1	2	1	1	2014	3.55825	660271	2	1	0	15		5	5	2	2	1
2	2	1	2	2	1	0	2014	3.55825	660271	2	0	0	16	2	5	5	2	2	1
2	2	2	2	2	0	0	2014	3.55825	660271	2	0	0	15	2	5	5	2	2	1
2	2	1	2	2	1	0	2014	3.55825	660271	2	1	1	15	2	5	5	2	2	1
2	2	2	2	2	0	0	2014	3.46571	660271	2	0	0	14	2	4	5	2	2	1
2	2	2	2	2	0	0	2014	5.36202	660271	2	0	0	17	2	6	5	2	2	1
1	2	2	2	2	1	0	2014	3.94343	660271	2	0	0	16	1	5	6	1	1	1
1	2	1	1	2	1	1	2014	5.14459	660271	2	1	1	17	2	7	5	2	1	2
2							2014	5.5264	660271	2	0	0	16	1	6	5	2	2	1
1	2	2	1	2	1	1	2014	3.66734	660271	2	1	1	16	1	5	5	2	1	7
1	1	2	1	2	1	1	2014	5.5264	660271	2	0	0	17	1	6	5	2	2	1
2	2	2	2	2	0	0	2014	6.42568	660271	2	0	0	16	1	6	3	2	2	1
1	2	1	2	2	1	0	2014	3.55825	660271	2	0	0	16	2	5	5	2	1	1
1	2	1	2	2	1	0	2014	3.66734	660271	2	1	0	17	1	5	5	2	1	3
1	2	1	2	2	1	0	2014	3.82613	660271	2	1	1	17	2			1	1	1
2	2	2	2	2	0	0	2014	3.55825	660271	2	1	0	15	2	5	5	2	1	1
1	2	2	2	2	1	0	2014	3.55825	660271	2	0	0	16	2	5	5		2	1
1	2	1	1	2	1	1	2014	3.55825	660271	2	0	0	14	2	5	5	2	2	1
1	2	2	2	2	1	0	2014	3.66734	660271	2	0	0	16	1	5	5	2	2	1
1	2	2	1	2	1	1	2014	3.55825	660271	2	0	0	16	2	5	5	2	2	1
1	1	2	2	2	1	0	2014	4.2641	660271	2	0	0	15	1	5	3	2	1	1
2	2	2	2	2	0	0	2014	5.14459	660271	2	0	0	18	2	7	2	2	1	1
1	2	2	1	2	1	1	2014	5.5264	660271	2	0	0	16	1	6	5	2	2	1
2	2	2	2	2	0	0	2014	4.2641	660271	2	0	0	15	1	5	3		2	1
1	2	2	2	2	1	0	2014	5.14459	660271	2	0	0	19	2	7	5	2	1	6
2	2	2	2	2	0	0	2014	4.1532	660271	2	0	0	15	1	4	3	2	2	1
2	2	2	2	2	0	0	2014	3.55825	660271	2	0	0	16	2	5	5	2	1	1
1	2	1	2	2	1	0	2014	3.66734	660271	2	0	0	17	1	5	6	2	1	1
1	2	2	1	2	1	1	2014	4.13727	660271	2	0	0	16	2	5	3	2	2	1
2	2	2	2	2	0	0	2014	5.36202	660271	2	0	0	17	2	6	5	2	2	1
1	2	2	2	2	1	0	2014	3.55825	660271	2	0	0	16	2	5	1	2	2	1
1	2	2	2	2	1	0	2014	3.46571	660271	2	0	0	15	2	4	5	2	2	1
1	2	2	2	2	1	0	2014	3.55825	660271	2	1	1	16	2	5	5	2	1	1
1	2	2	2	2	1	0	2014	3.66734	660271	2	0	0	17	1	5	5	2	2	1
2	2	2	2	2	0	0	2014	6.18603	660101	2	0	0	17	1	7	5	2	2	1
1	2	1	1	2	1	1	2014	6.18603	660101	2	0	0	19	1	7	2	2	2	1
1	2	1	2	2	1	0	2014	6.00202	660101	2	1	0	18	2	7	5	2	1	1
2	2	2	2	2	0	0	2014	6.18603	660101	2	0	0	18	1	7	5	2	1	1
2	2	2	2	2	0	0	2014	6.00202	660101	2	0	0	17	2	7	5	2	2	1
2	2	2	2	2	0	0	2014	6.00202	660101	2	0	0	18	2	7	5	2	1	1
2	2	2	2	2	0	0	2014	6.18603	660101	2	0	0	17	1	7	5	2	2	1
2	2	2	2	2	0	0	2014	6.18603	660101	2	0	0	19	1	7	5	2	1	1
1	1	1	2	1	1	0	2014	6.9787	660101	2	1	1	19	2	7	3	2	1	6
1	2	2	2	2	1	0	2014	6.18603	660101	2	0	0	18	1	7	5	2	1	2
							2014	6.00202	660101	2	0	0	17	2	7	5	2	2	1
2	2	2	2	2	0	0	2014	6.18603	660101	2	0	0	17	1	7	5	2	2	1
1	2	2	2	2	1	0	2014	6.18603	660101	2	0	0	17	1	7	5	2	2	1
2	2	2	2	2	0	0	2014	4.1513	660101	2	0	0	16	2	5	5	2	2	1
2	2	2	2	2	0	0	2014	4.04332	660101	2	0	0	16	2	4	5	2	1	1
2	1	1	2	2	1	0	2014	4.27856	660101	2	0	0	16	1	5	5	2	2	1
1	2	1	2	2	1	0	2014	4.04332	660101	2	1	0	15	2	4		2	1	1
1	1	1	1	1	1	1	2014	4.16728	660101	2	1	1	17	1	4	5	2	1	7
1	2	2	2	2	1	0	2014	4.16728	660101	2	0	0	14	1	4	5	2	2	1
2	1	2	1	2	1	1	2014	4.34772	660101	2	0	0	15	2	4	6	1	2	1
2	2	1	2	2	1	0	2014	3.46571	660271	2	1	1	15	2	4	5	2	1	2
2	2	2	2	2	0	0	2014	3.46571	660271	2	0	0	15	2	4	5	2	2	1
2	2	2	2	2	0	0	2014	4.1532	660271	2			14	1	4	3	2	1	1
1	2	2	2	2	1	0	2014	3.46571	660271	2	0	0	15	2	4	5	2	2	1
2	2	1	2	2	1	0	2014	3.57195	660271	2	0	0	15	1	4	5	2	1	1
							2014	3.57195	660271	2	0	0	14	1	4	5	2	1	7
1	1	1	1	1	1	1	2014	3.46571	660271	2	1	1	17	2	4	5	2	1	6
2	2	2	2	2	0	0	2014	3.46571	660271	2	0	0	15	2	4	5	2	2	1
1	2	1	1	2	1	1	2014	3.46571	660271	2	0	0	16	2	4	5	2	2	1
							2014	5.30231	660271	2	0	0	17	1	7	5	2	2	1
1	2	2	2	2	1	0	2014	3.66734	660271	2	0	0	15	1	5	5	2	2	1
1	2	2	2	2	1	0	2014	3.55825	660271	2	0	0	16	2	5	5	2	2	1
1	2	2	2	2	1	0	2014	3.55825	660271	2	0	0	15	2	5	5	2	1	1
1	2	2	1	2	1	1	2014	3.66734	660271	2	1	1	15	1	5	6		1	5
1	2	2	2	2	1	0	2014	3.66734	660271	2	0	0	16	1		5	2	2	1
							2014	5.36202	660271	2	0	0	18	2	6	6	2	2	1
2	2	1	2	2	1	0	2014	3.46571	660271	2	0	0	14	2	4	5	2	1	1
1	2	2	2	2	1	0	2014	3.55825	660271	2	0	0	17	2	5	5	2	2	1
2	2	2	2	2	0	0	2014	3.46571	660271	2	1	1	14	2	4	5	2	2	1
1	2	2	2	2	1	0	2014	3.46571	660271	2	0	0	15	2	4	5	2	2	1
2	2	2	2	2	0	0	2014	5.71783	650071	2	0	0	17	1	6	5	2	2	1
1	2	2	1	1	1	1	2014	4.08282	650071	2	0	0	17	1	7	5		1	1
2	2	2	2	1	1	0	2014	4.08282	650071	2	1	0	18	1	7	5	2	2	1
1	2	2	2	2	1	0	2014	4.08282	650071	2	1	1	17	1	7	4	2	1	1
2	2	2	2	2	0	0	2014	4.08282	650071	2	0	0	18	1	7	5	2	1	1
2	2	2	2	2	0	0	2014	3.29608	650071	2	1	1	16	1	5	2	2	2	1
2	2	2	2	2	0	0	2014	4.08282	650071	2	0	0	18	1	7	6	2	2	1
2	2	2	2	2	0	0	2014	4.70952	650071	2	0	0	18	2	7	6	2	2	1
2	2	2	2	2	0	0	2014	6.5955	650071	2		0	16	2	6	5	2	2	1
2	2	1	2	2	1	0	2014	4.70952	650071	2	0	0	18	2	7	5	2	2	1
2	2	2	2	2	0	0	2014	6.5955	650071	2	1	1	17	2	6	5	2	2	1
2	2	2	2	2	0	0	2014	4.08282	650071	2	0	0	18	1	7	5	2	2	1
2	2	2	2	2	0	0	2014	5.71783	650071	2	0	0	17	1	6	5	2	1	1
2	2	2	2	2	0	0	2014	4.08282	650071	2	0	0	18	1	7	5	2	2	1
1	1	2	2	1	1	0	2014	3.17957	650071	2	1	1	15	1	4	5	2	1	7
1	1	2	1	2	1	1	2014	3.17957	650071	2	0	0	15	1	4	5	2	2	1
1	1	1	1	1	1	1	2014	2.93148	650071	2	1	1	16	1	6	6	1	1	7
2	2	1	2	2	1	0	2014	3.17957	650071	2	0	0	14	1	4	5	2	2	1
2	2	2	2	2	0	0	2014	1.72287	650071	2	0	0	18	2	1	3	1	2	1
2	2	2	2	2	0	0	2014	4.08282	650071	2	0	0	18	1	7	5	2	1	1
1	2	2	2	2	1	0	2014	4.08282	650071	2	0	0	17	1	7	5	2	2	1
1	2	2	2	2	1	0	2014	6.5955	650071	2	1	0	16	2	6	5	2	1	7
1	2	2	1	2	1	1	2014	4.08282	650071	2	1	1	19	1	7	5	2	1	7
2	2	2	2	2	0	0	2014	6.5955	650071	2	0	0	17	2	6	2	2	2	1
2	2	2	1	2	1	1	2014	5.71783	650071	2	1	0	16	1	6	5	2	1	1
1	2	2	1	2	1	1	2014	5.71783	650071	2	0	0	16	1	6	5	2	2	1
1	2	2	2	2	1	0	2014	6.5955	650071	2	0	0	16	2	6		2	1	1
2	2	2	2	2	0	0	2014	6.26079	650071	2	0	0	17	2	6	3	2	2	1
2	2	2	2	2	0	0	2014	3.38145	650071	2	0	0	16	2	6	3	1	2	1
1	2	2	1	2	1	1	2014	4.70952	650071	2	1	0	18	2	7	5	2	1	5
2	2	2	2	2	0	0	2014	4.70952	650071	2	0	0	18	2	7	5	2	2	1
2	2	1	2	2	1	0	2014	5.71783	650071	2	1	0	17	1	6	5	2	1	1
2	2	1	2	2	1	0	2014	3.17957	650071	2	0	0	14	1	4	5	2	2	1
2	2	2	2	2	0	0	2014	3.17957	650071	2	1	0	16	1	4	5	2	1	1
							2014	3.12882	650071	2	0	0	16	1	5	3	2	2	1
2	2	2	2	2	0	0	2014	3.66763	650071	2	0	0	14	2	4	5	2	2	1
2	2	2	2	2	0	0	2014	6.5955	650071	2	1	1	18	2	6	4	2	1	6
							2014	3.66763	650071	2	0	0	15	2	4	5	2	2	1
2	2	2	2	2	0	0	2014	3.80202	650071	2	0	0	15	2	5	5	2	2	1
1	2	1	1	2	1	1	2014	3.17957	650071	2	1	0	15	1	4	5	2	1	1
1	2	1	2	2	1	0	2014	3.66763	650071	2	0	0	14	2	4	5	2	1	1
1	2	1	2	2	1	0	2014	3.80202	650071	2	0	0	16	2	5	5	2	2	1
2	2	1	2	2	1	0	2014	3.80202	650071	2	0	0	15	2	5	5	2	2	1
2	2	2	2	2	0	0	2014	3.80202	650071	2	0	0	16	2	5	5	2	2	1
2	2	1	1	2	1	1	2014	1.63014	650071	2	0	0	15	1	4	6	1	2	1
1	2	1	1	2	1	1	2014	3.29608	650071	2	0	0	15	1	5	5	2	1	4
2	2	2	2	2	0	0	2014	3.29608	650071	2	0	0	15	1	5	5	2	2	1
2	2	2	2	2	0	0	2014	3.29608	650071	2	0	0	16	1	5	5	2	2	1
1	2	2	1	1	1	1	2014	3.29608	650071	2	1	0	17	1	5	5	2	1	1
2	2	2	2			0	2014	3.80202	650071	2	0	0	16	2	5	5	2	1	1
1	1	2	1	2	1	1	2014	3.29608	650071	2	0	0	15	1	5	5	2	2	1
2	2	2	1	2	1	1	2014	3.80202	650071	2	0	0	16	2	5	5	2	1	1
2	2	1	2	2	1	0	2014	3.29608	650071	2	1	0	16	1	5	5	2	1	1
1	1	1	1	2	1	1	2014	3.29608	650071	2	1	1	16	1	5	5	2	1	2
2	2	2	2	2	0	0	2014	4.70952	650071	2	0	0	17	2	7	5	2	2	1
2	2	2	2	2	0	0	2014	6.5955	650071	2	1	1	17	2	6	5	2	2	1
2	2	2	2	2	0	0	2014	4.70952	650071	2	0	0	18	2	7	5	2	2	1
2	2	2	2	2	0	0	2014	3.80202	650071	2	0	0	16	2	5	5	2	2	1
2	2	2	2	2	0	0	2014	4.70952	650071	2	1	0	18	2	7	5	2	1	1
							2014	3.80202	650071	2	1	1	16	2	5		2	1
2	2	1	2	2	1	0	2014	3.17957	650071	2	0	0	16	1	4	5	2	1	1
2	2	2	2	2	0	0	2014	3.17957	650071	2	0	0	15	1	4	5	2	2	1
1	2	2	1	2	1	1	2014	3.17957	650071	2	0	0	15	1	4	5	2	2	1
1	2	2	2	1	1	0	2014	3.17957	650071	2	1	1	15	1	4	5	2	1	1
1	2	2	1	2	1	1	2014	3.17957	650071	2	0	0	14	1	4	5	2	1	1
1	2	1	1	2	1	1	2014	3.29608	650071	2	0	0	16	1	5	5	2	1	1
2	2	2	2	2	0	0	2014	3.17957	650071	2	0	0	14	1	4	5	2	2	1
2	2	2	2	2	0	0	2014	3.17957	650071	2	0	0	14	1	4	5	2	2	1
1	2	2	2	2	1	0	2014	3.17957	650071	2	1	0	16	1	4	5	2	1	7
2	2	1	2	2	1	0	2014	3.17957	650071	2	0	0	14	1	4	5	2	2	1
2	2	2	2	2	0	0	2014	3.01822	650071	2	0	0	15	1	4	3	2	2	1
1	2	2	1	2	1	1	2014	3.80202	650071	2	1	1	16	2	5	5	2	1	1
1	2	2	1	2	1	1	2014	3.80202	650071	2	1	1	15	2	5	5	2	1	1
1	2	1	2	2	1	0	2014	3.17957	650071	2	0	0	15	1	4	5	2	2	1
							2014	3.17957	650071	2			16		4	5
1	2	1		1	1		2014	3.66763	650071	2	1	1	14	2	4	5	2	1	2
							2014	1.88036	650071	2	1	1	16	2	4	5	1	1	6
							2014	1.88036	650071	2	1	1	16	2	4	1	1	1	6
							2014	3.66763	650071	2	0	0	15	2	4	5	2	2	1
2	2	2	2	2	0	0	2014	3.48151	650071	2	0	0	14	2	4	3	2	1	1
1	2	2	2	2	1	0	2014	3.17957	650071	2	0	0	14	1	4	5	2	2	1
2	2	2	2	2	0	0	2014	3.17957	650071	2	0	0	15	1	4	5	2	2	1
2	2	2	2	2	0	0	2014	3.80202	650071	2	0	0	16	2	5	5	2	2	1
2	2	2	2	2	0	0	2014	3.17957	650071	2	0	0	15	1	4	5	2	2	1
2	2	1	2	2	1	0	2014	3.17957	650071	2	0	0	14	1	4	5	2	2	1
2	2	2	2	2	0	0	2014	3.80202	650071	2	0	0	15	2	5	5	2	2	1
2	2	2	2	2	0	0	2014	3.66763	650071	2	0	0	14	2	4	5	2	2	1
2	2	1	2	2	1	0	2014	3.17957	650071	2	0	0	15	1	4	5	2	2	1
2	2	1	2	2	1	0	2014	3.80202	650071	2	0	0	16	2	5	5	2	2	1
1	2	2	1	2	1	1	2014	3.29608	650071	2	1	1	15	1	5	5	2	1	2
							2014	3.01822	650071	2	0	0	14	1		3	2	2	1
2	2	2	2	2	0	0	2014	3.29608	650071	2	0	0	15	1	5	5	2	2	1
2	2	2	2	2	0	0	2014	5.71783	650071	2	0	0	17	1	6	5	2	2	1
2	2	2	2	2	0	0	2014	5.71783	650071	2	0	0	17	1	6	5	2	2	1
2	2	1	2	2	1	0	2014	5.71783	650071	2	0	0	17	1	6	5	2	1	1
2	2	2	2	2	0	0	2014	5.71783	650071	2	0	0	17	1	6	5	2	2	1
2	2	2	2	2	0	0	2014	4.70952	650071	2	0	0	17	2	7	5	2	2	1
2	2	2	2	2	0	0	2014	3.12882	650071	2	0	0	15	1	5	3	2	2	1
2	2	1	2	2	1	0	2014	4.70952	650071	2	1	0	18	2	7	5	2	1	1
1	1	1	2	2	1	0	2014	4.08282	650071	2	0	0	17	1	7	5	2	1	1
2	2	1	2	2	1	0	2014	4.08282	650071	2	1	1	18	1	7	5	2	1	7
2	2	2	2	2	0	0	2014	3.29608	650071	2	0	0	15	1	5	5	2	2	1
2	2	2	2	2	0	0	2014	5.71783	650071	2	0	0	16	1	6	5	2	2	1
1	2	2	2	2	1	0	2014	3.17957	650071	2	1	1	16	1	4	5	2	1	6
2	2	2	2	2	0	0	2014	4.70952	650071	2	0	0	18	2	7	1	2	2	1
1	2	2	2	2	1	0	2014	1.63014	650071	2	1	1	14	1	4	6	1	2	1
2	2	2	2	2	0	0	2014	3.17957	650071	2	0	0	15	1	4	5	2	2	1
2	2	2	2	2	0	0	2014	3.29608	650071	2	0	0	16	1	5	5	2	2	1
2	2	2	2	2	0	0	2014	3.80202	650071	2	0	0	15	2	5	5	2	2	1
2	2	2	2	2	0	0	2014	2.09322	650071	2	0	0	18	1	7	5	1	2	1
1	1	1	2	2	1	0	2014	4.70952	650071	2	0	0	17	2	7	5	2	2	1
2	2	1	2	2	1	0	2014	4.70952	650071	2	0	0	18	2	7	5	2	2	1
2	2	2	2	2	0	0	2014	4.08282	650071	2	0	0	17	1	7	5	2	2	1
1	2	2	1	2	1	1	2014	3.29608	650071	2	1	1	16	1	5	5	2	1	1
2	2	2	2	2	0	0	2014	3.60908	650071	2	0	0	16	2	5	3	2	2	1
2	2	2	2	2	0	0	2014	3.48151	650071	2	0	0	14	2	4	3	2	2	1
2	2	2	2	2	0	0	2014	3.48151	650071	2	0	0	16	2	4	3	2	2	1
2	2	2	2	2	0	0	2014	3.17957	650071	2	0	0	14	1	4	5	2	1	1
1	1	1	1	1	1	1	2014	3.80202	650071	2	1	1	15	2	5	5	2	1	1
2	2	2	2	2	0	0	2014	3.29608	650071	2	0	0	16	1	5	5	2	2	1
2	2	2	2	2	0	0	2014	3.29608	650071	2	0	0	15	1	5	5	2	1	1
2	2	2	2	2	0	0	2014	3.29608	650071	2		0	16	1	5	5	2	2	1
2	2	2	2	2	0	0	2014	3.12882	650071	2	0	0	15	1	5	3	2	2	1
1	2	2	1	2	1	1	2014	3.66763	650071	2	0	0	14	2	4	5	2	2	1
1	2	2	2	2	1	0	2014	3.29608	650071	2	0	0	16	1	5	5	2	2	1
2	2	2	2	2	0	0	2014	3.29608	650071	2	0	0	16	1	5	5	2	2	1
2	2	2	2	2	0	0	2014	3.80202	650071	2	0	0	16	2	5	5	2	2	1
2	2	1	2	2	1	0	2014	1.94926	650071	2	0	0	16	2	5	5	1	2	1
1	2	2	1	2	1	1	2014	3.80202	650071	2	0	0	15	2	5	5	2	2	1
2	2	2	2	2	0	0	2014	5.71783	650071	2	0	0	16	1	6	5	2	1	1
2	2	2	2	2	0	0	2014	3.80202	650071	2	0	0	16	2	5	5	2	2	1
2	2	1	2	2	1	0	2014	3.29608	650071	2	0	0	15	1	5	5	2	2	1
		1			1		2014	3.60908	650071	2			15	2	5	3	2
2	2	2	2	2	0	0	2014	3.80202	650071	2	0	0	15	2	5	5	2	2	1
2	2	2	2	2	0	0	2014	3.29608	650071	2	0	0	15	1	5	5	2	2	1
2	2	2	2	2	0	0	2014	3.01822	650071	2	0	0	15	1	4	3	2	2	1
2	2	2	2	2	0	0	2014	4.70952	650071	2	1	0	18	2	7	5	2	1	7
2	2	1	2	1	1	0	2014	4.70952	650071	2	1	1	18	2	7	5	2	1	2
2	2	2	2	2	0	0	2014	3.48151	650071	2	0	0	14	2	4	3	2	2	1
2	2	2	2	2	0	0	2014	3.17957	650071	2	0	0	16	1	4	5	2	2	1
2	2	2	2	2	0	0	2014	3.12882	650071	2	0	0	16	1	5	3	2	1	1
1	2	2	2	2	1	0	2014	3.66763	650071	2	0	0	15	2	4	5	2	2	1
2	2	2	2	2	0	0	2014	3.80202	650071	2	0	0	16	2	5	5	2	2	1
1	2	1	1	2	1	1	2014	3.66763	650071	2	0	0	14	2	4	5	2	1	1
1	2	2	2	2	1	0	2014	3.29608	650071	2	0	0	15	1	5	6	2	2	1
2	2	2	2	2	0	0	2014	3.29608	650071	2	0	0	16	1	5	5	2	2	1
2	2	2	2	2	0	0	2014	5.71783	650071	2	0	0	17	1	6	5	2	2	1
2	2	2	2	2	0	0	2014	4.70952	650071	2	0	0	17	2	7	5	2	1	1
2	2	2	2	2	0	0	2014	3.66763	650071	2	0	0	15	2	4	5	2	2	1
1		1			1		2014	3.66763	650071	2	0		15	2	4	5	2	1	3
2	2	2	2	2	0	0	2014	3.66763	650071	2	0	0	14	2	4	5	2	2	1
1	2	2	2	2	1	0	2014	3.29608	650071	2	0	0	16	1	5	5	2	1	1
2	2	2	2	2	0	0	2014	4.08282	650071	2	0	0	17	1	7	5	2	2	1
2	2	2	2	2	0	0	2014	3.80202	650071	2	1	1	16	2	5	5	2	1	7
2	2	2	2	2	0	0	2014	3.60908	650071	2	0		17	2	5	3	2	2	1
2	2	2	2	2	0	0	2014	3.80202	650071	2	0	0	17	2	5	5	2	2	1
2	2	2	2	2	0	0	2014	3.80202	650071	2	0	0	16	2	5	5	2	2	1
2	2	2	1	2	1	1	2014	3.60908	650071	2	1	0	17	2	5	3	2	2	1
1	2	1	1	2	1	1	2014	3.80202	650071	2	1	1	16	2	5	5	2	1	7
1	2	2	2	2	1	0	2014	3.17957	650071	2	0	0	14	1	4	5	2	2	1
2	2	2	2	2	0	0	2014	3.66763	650071	2	0	0	15	2	4	5	2	2	1
2	2	2	2	2	0	0	2014	3.17957	650071	2	0	0	14	1	4	2	2	2	1
2	2	2	2	2	0	0	2014	3.01822	650071	2	0	0	15	1	4	3	2	2	1
2	2	2	2	2	0	0	2014	3.17957	650071	2	0	0	15	1	4	5	2	2	1
2	2	2	2	2	0	0	2014	3.17957	650071	2	0	0	14	1	4	5	2	2	1
2	2	2	2	2	0	0	2014	3.17957	650071	2	0	0	14	1	4	5	2	2	1
2	2	2	1	2	1	1	2014	3.17957	650071	2	0	0	14	1	4	5	2	2	1
2	2	2	2	2	0	0	2014	3.66763	650071	2	0	0	15	2	4	5	2	2	1
2	2	1	1	2	1	1	2014	3.17957	650071	2	1	0	15	1	4	5	2	1	1
2	2	2	2	2	0	0	2014	3.01822	650071	2	1	0	15	1	4	3	2	1	1
2	2	2	2	2	0	0	2014	3.17957	650071	2	0	0	14	1	4	2	2	2	1
2	2	2	1	2	1	1	2014	3.17957	650071	2	0	0	15	1	4	5	2	2	1
1	2	2	2	2	1	0	2014	3.17957	650071	2	0	0	14	1	4	5	2	1	1
1	1	1	2	2	1	0	2014	3.17957	650071	2	0	0	15	1	4	5	2	2	1
1	2	2	2	2	1	0	2014	3.17957	650071	2	0	0	15	1	4	5	2	2	1
1	1	2	1	2	1	1	2014	4.08282	650071	2	0	0	18	1	7	5	2	2	1
2	2	2	2	2	0	0	2014	3.87563	650071	2	0	0	18	1	7	3	2	1	1
1	1	2	1	2	1	1	2014	4.70952	650071	2	1	1	18	2	7	5	2	1	7
2	2	2	2	2	0	0	2014	4.08282	650071	2	1	1	18	1	7	5	2	1	1
1	2	1	2	2	1	0	2014	4.70952	650071	2	1	1	18	2	7	5	2	1	6
2	2	1	2	2	1	0	2014	4.08282	650071	2	0	0	19	1	7	5	2	2	1
1	2	1	1	2	1	1	2014	3.17957	650071	2	0	0	15	1	4	5	2	2	1
1	2	1	2	2	1	0	2014	4.70952	650071	2	1	0	19	2	7	5	2	1	2
2	2	2	2	2	0	0	2014	4.70952	650071	2	0	0	18	2	7	5	2	2	1
1	2	2	1	2	1	1	2014	4.70952	650071	2	0	0	18	2	7	5	2	2	1
1	2	2	2	2	1	0	2014	4.70952	650071	2	0	0	18	2	7	6	2	2	1
2	2	2	2	2	0	0	2014	4.08282	650071	2	1	0	19	1	7	5	2	1	2
1	2	2	2	2	1	0	2014	6.5955	650071	2	0	0	16	2	6	5	2	2	1
1	2	2	2	2	1	0	2014	6.5955	650071	2	0	0	17	2	6	5		2	1
2	2	2	2	2	0	0	2014	6.5955	650071	2	1	0	16	2	6	5	2	2	1
2	1	2	1	2	1	1	2014	6.26079	650071	2	1	0	17	2	6	3	2	1	1
2	2	2	2	2	0	0	2014	4.70952	650071	2	0	0	18	2	7	5	2	2	1
1	2	2	2	1	1	0	2014	6.5955	650071	2	0	0	16	2	6	5	2	2	1
2	2	2	2	2	0	0	2014	6.5955	650071	2	0	0	17	2	6	6	2	1	1
2	2	2	2	2	0	0	2014	3.29608	650071	2	1	0	15	1	5	5	2	1	1
							2014	6.5955	650071	2	0	0	17	2	6	5	2	2	1
2	2	2	2	2	0	0	2014	6.5955	650071	2	0	0	17	2	6	5	2	1	1
2	2	2	2	2	0	0	2014	5.71783	650071	2	0	0	17	1	6	5	2	2	1
2	2	2	2	2	0	0	2014	3.66763	650071	2	0	0	15	2	4	5	2	2	1
1	2	2	1	2	1	1	2014	5.71783	650071	2	0	0	17	1	6	5	2	2	1
2	2	2	2	2	0	0	2014	3.48151	650071	2	0	0	14	2	4	3	2	1	2
1	1	1	1		1	1	2014	3.17957	650071	2	0	0	15	1	4	5	2	2	1
1	2	1	2	2	1	0	2014	3.66763	650071	2	0	0	15	2	4	5	2	2	1
2	2	1	1	2	1	1	2014	3.66763	650071	2	1	1	14	2	4	5	2	1	2
1	2	2	2	2	1	0	2014	3.80202	650071	2	1	0	16	2	5	6	2	2	1
2	2	2	2	2	0	0	2014	3.60908	650071	2	0	0	16	2	5	3	2	1	1
2	2	2	2	2	0	0	2014	3.29608	650071	2	0	0	15	1	5	5	2	2	1
2	2	2	2	2	0	0	2014	3.60908	650071	2	0	0	16	2	5	3	2	2	1
2	2	2	2	2	0	0	2014	3.80202	650071	2	0	0	15	2	5	5	2	1	1
2	2	2	2	2	0	0	2014	3.80202	650071	2	0	0	16	2	5	5	2	2	1
1	2	2	1	2	1	1	2014	3.29608	650071	2	1	0	15	1	5	5	2	2	1
2	2	1	2	2	1	0	2014	5.71783	650071	2	0	0	17	1	6	5	2	2	1
1	2	2	2	2	1	0	2014	5.71783	650071	2	0	0	16	1	6	5	2	2	1
1	1	1	1	1	1	1	2014	5.42767	650071	2	1	1	9	1	8	3	2	1	7
							2014	2.41453	650071	2	0	0	18	2	7	5	1	1	7
2	2	2	2	2	0	0	2014	6.5955	650071	2	0	0	17	2	6	5	2	2	1
2	2	2	2	2	0	0	2014	1.88036	650071	2	0	0	15	2	4	6	1	2	1
2	2	2	2	2	0	0	2014	5.42767	650071	2	0	0	18	1	6	3	2	2	1
2	2	2	2	2	0	0	2014	3.29608	650071	2	0	0	16	1	5	1	2	2	1
2	2	2	2	2	0	0	2014	3.29608	650071	2	0	0	15	1	5	5	2	2	1
2	2	2	2	2	0	0	2014	3.29608	650071	2	0	0	16	1	5	5	2	2	1
1		1	1		1	1	2014	3.29608	650071	2	1	1	15	1	5	5	2	1	1
1	2	2	1	2	1	1	2014	3.80202	650071	2	0	0	16	2	5	5	2	2	1
2	2	2	2	2	0	0	2014	3.17957	650071	2	0	0	15	1	4	5	2	1	1
1	2	1	1	1	1	1	2014	3.17957	650071	2	1	0	15	1	4	5	2	2	1
2	2	2	2	2	0	0	2014	3.48151	650071	2	1	0	16	2	4	3	2	2	1
1	2	2	2	2	1	0	2014	3.17957	650071	2	1	1	15	1	4	5	2	1	7
1	2	2	1	2	1	1	2014	3.17957	650071	2	1	0	15	1	4	5	2	1	1
1	1	2	1	2	1	1	2014	3.66763	650071	2	0	0	15	2	4	5	2	2	1
2	2	1	2	2	1	0	2014	4.70952	650071	2	0	0	18	2	7	5	2	1	1
2	2	2	2	2	0	0	2014	5.71783	650071	2	0	0	17	1	6	5	2	2	1
2	2	2	2	2	0	0	2014	3.66763	650071	2	1	0	16	2	4		2	2	1
2	2	2	2	2	0	0	2014	3.80202	650071	2	0	0	16	2	5	5	2	2	1
1	1	1	1	2	1	1	2014	6.5955	650071	2	1	1	16	2	6	5	2	1	7
2	2	2	2	2	0	0	2014	3.66763	650071	2	0	0	15	2	4	5	2	2	1
1	2	2	2	2	1	0	2014	3.80202	650071	2	0	0	16	2	5	5	2	2	1
1	2	1	2	1	1	0	2014	3.66763	650071	2	1	0	15	2	4	5	2	1	5
1	1	1	1	1	1	1	2014	3.80202	650071	2	1	1	16	2	5	5	2	1	2
2	2	2	1	2	1	1	2014	4.70952	650071	2	0	0	17	2	7	5	2	2	1
2	2	1	1	2	1	1	2014	3.66763	650071	2	0	0	15	2	4	5	2	1	1
2	2	2	2	2	0	0	2014	3.80202	650071	2	0	0	15	2	5	5	2	2	1
2	2	2	2	2	0	0	2014	4.08282	650071	2	0	0	17	1	7	5	2	2	1
1	1	1	1	1	1	1	2014	3.80202	650071	2	0	0	16	2	5	5	2	1	1
2	1	2	2	2	1	0	2014	3.60908	650071	2	0	0	17	2	5	3	2	2	1
2	2	1	2	2	1	0	2014	3.12882	650071	2	0	0	16	1	5	3	2	1	1
1	2	2	2	2	1	0	2014	3.17957	650071	2	0	0	15	1	4	5	2	1	1
2	2	2	2	2	0	0	2014	4.70952	650071	2	0	0	17	2	7	2	2	2	1
1	1	1	1	1	1	1	2014	6.5955	650071	2	1	1	17	2	6	5		1	5
2	2	2	2	2	0	0	2014	3.80202	650071	2	0	0	16	2	5	5	2	2	1
2		2	2	2		0	2014	3.17957	650071	2	0	1	16	1	4	5	2	1	7
2	2	2	2	2	0	0	2014	3.87563	650071	2	0	0	19		7	3	2	2	5
2	2	1	2	2	1	0	2014	3.66763	650071	2	0	0	16	2	4	2	2	2	1
2	2	1	2	2	1	0	2014	3.17957	650071	2	0	0	15	1	4	5	2	2	1
2	2	2	2	2	0	0	2014	3.66763	650071	2	0	0	14	2	4	5	2	2	1
2	2	2	2	2	0	0	2014	3.66763	650071	2	0	0	15	2	4	5	2	2	1
2	1	2	2	2	1	0	2014	3.17957	650071	2	0	0	15	1	4	5	2	2	1
1	1	2	2	2	1	0	2014	4.08282	650071	2	0	0	17	1	7	5	2	2	1
2	2	2	2	2	0	0	2014	3.80202	650071	2	0	0	16	2	5	5	2	2	1
2	2	2	2	2	0	0	2014	4.08282	650071	2	0	0	19	1	7	5	2	1	3
1	1	2	1	2	1	1	2014	4.08282	650071	2	0	0	17	1	7	5	2	2	1
2	2	2	2	2	0	0	2014	4.70952	650071	2	0	0	18	2	7	5	2	2	1
2	2	2	2	2	0	0	2014	3.29608	650071	2	1	0	16	1	5	6	2	1	1
2	2	2	2	2	0	0	2014	4.70952	650071	2	1	0	17	2	7	5	2	1	1
1	2	2	2	2	1	0	2014	5.71783	650071	2	1	1	16	1	6	5	2	1	4
1	2	2	1	2	1	1	2014	3.29608	650071	2	0	0	16	1	5	5	2	2	1
1	2	2	2	2	1	0	2014	6.5955	650071	2	0	0	18	2	6	5	2	1	1
2	2	2	2	2	0	0	2014	3.66763	650071	2	0	0	15	2	4	5	2	2	1
2	2	2	2	2	0	0	2014	6.5955	650071	2	1	1	17	2	6	5	2	1	1
2	2	2	2	2	0	0	2014	4.70952	650071	2	0	0	17	2	7	5	2	1	1
2	2	1	1	2	1	1	2014	4.08282	650071	2	0	0	18	1	7	5	2	2	1
1	1	1	1	1	1	1	2014	1.88036	650071	2	1	1	21	2	8	3	1	1	7
1	2	2	2	2	1	0	2014	3.17957	650071	2	1	0	15	1	4	5	2	1	2
1	2	2	2	2	1	0	2014	4.08282	650071	2	1	1	18	1	7	5	2	1	1
2	2	2	2	2	0	0	2014	3.29608	650071	2	0	0	16	1	5	5		1	1
2	2	2	2	2	0	0	2014	3.17957	650071	2	0	0	16	1	4	5	2	2	1
1	2	1	1	2	1	1	2014	5.71783	650071	2	1	1	17	1	6	5	2	1	7
2	2	2	2	2	0	0	2014	6.5955	650071	2	0	0	18	2	6	6	2	2	1
2	2	2	2	2	0	0	2014	5.71783	650071	2	0	0	17	1	6	5	2	2	1
2	2	2	2	2	0	0	2014	6.5955	650071	2	0	0	18	2	6	5	2	1	1
1	2	2	2	2	1	0	2014	3.66763	650071	2	1	0	15	2	4	5	2	1	1
							2014	1.94926	650071	2	0	0	15	2	5	5	1	1	1
1	2	1	1	2	1	1	2014	3.66763	650071	2	0	0	15	2	4	5	2	2	1
1	2	1	1	2	1	1	2014	3.66763	650071	2	0	0	15	2	4	5	2	2	1
1	1	1	1	2	1	1	2014	3.66763	650071	2	1	0	15	2	4	5		1	3
1	2	2	1	2	1	1	2014	3.17957	650071	2	0	0	15	1	4	5	2	2	1
2	2	2	2	2	0	0	2014	3.17957	650071	2	0	0	15	1	4	5	2	2	1
							2014	3.66763	650071	2	0	0	15	2	4	5	2	2	1
1	2	2	2	2	1	0	2014	4.70952	650071	2	1	0	17	2	7	5	2	1	6
1					1		2014	3.12882	650071	2	0	0	16	1	5	3	2	1	1
1	1	2	1	2	1	1	2014	3.29608	650071	2	0	0	17	1	5	5	2	2	1
2	2	2	1	2	1	1	2014	3.80202	650071	2	0	0	16	2	5	5	2	2	1
2	2	1	1	2	1	1	2014	3.80202	650071	2	0	0	17	2	5	5	2	2	1
2	2	2	2	2	0	0	2014	3.80202	650071	2	0	1	16	2	5	5	2	1	5
2	2	2	1	1	1	1	2014	3.80202	650071	2	1	1	16	2	5	1	2	1	3
							2014	3.60908	650071	2	0	0	17	2	5	3	2	2	1
2	2	2	2	2	0	0	2014	3.17957	650071	2	0	0	14	1	4	5	2	2	1
1	2	2	1	2	1	1	2014	3.66763	650071	2	0	0	15	2	4	5	2	2	1
1	1	2	2	2	1	0	2014	3.66763	650071	2	0	0	15	2	4	1	2	1	2
2	2	2	2	2	0	0	2014	3.17957	650071	2	0	0	16	1	4	5	2	2	1
1	2	2	2	2	1	0	2014	3.66763	650071	2	1	0	15	2	4	5	2	1	5
1	2	2	1	1	1	1	2014	3.17957	650071	2	1	1	15	1	4	5	2	1	4
1	2	1	1	2	1	1	2014	3.66763	650071	2	1	1	15	2	4	2	2	1	7
1	2	1	1	1	1	1	2014	3.66763	650071	2	1	0	15	2	4	5		2	1
2	2	2	2	2	0	0	2014	3.66763	650071	2	0	0	15	2	4			2	1
1	2	2	2	2	1	0	2014	5.71783	650071	2	0	0	17	1	6	5	2	1	1
2	2	2	2	2	0	0	2014	6.5955	650071	2	1	1	17	2	6	5	2	1	1
1	1	2	1	1	1	1	2014	3.80202	650071	2	1	1	16	2	5	4	2	1	3
1	1	1	1		1	1	2014	3.66763	650071	2	0	0	16	2	4	4	2	1	2
1	1		1		1	1	2014	3.66763	650071	2	0	0	16	2	4	5		2	1
2	2	2	2	2	0	0	2014	3.66763	650071	2	1	0	15	2	4	5	2	1	1
2	2	1	2	2	1	0	2014	3.66763	650071	2	1	0	15	2	4	5	2	1	1
2		2	2	2		0	2014	4.47052	650071	2	0	0	18	2	7	3	2	2	1
1	2	2	2	2	1	0	2014	6.5955	650071	2	1	0	16	2	6	5	2	1	1
2	2	2	2	2	0	0	2014	3.17957	650071	2	0	0	15	1	4	5	2	2	1
							2014	1.88036	650071	2	0	0	14	2	4	3	1	2	1
2	2	2	2	2	0	0	2014	44.0376	644941	2	1	1	18	1	7	5	1	1	2
1	2	2	2	2	1	0	2014	29.6691	644941	2	0	0	15	1	4	5	2	2	1
2	2	2	2	1	1	0	2014	29.0679	644941	2	0	0	16	2	6	2	2	2	1
2	2	2	2	2	0	0	2014	49.0107	644941	2	1	0	17	1	7	5	2	2	1
							2014	44.0376	644941	2	1	1	18	1	7		1	2	1
1	2	2	2	2	1	0	2014	29.0679	644941	2	0	0	17	2	6	5	2	2	1
							2014	31.6153	644941	2	1	1	16	1	5	5	2	1	2
1	2	2	2	2	1	0	2014	29.0679	644941	2	0	0	16	2	6	5	2	2	1
							2014	34.2703	644941	2			16	2	5	6	2	2	1
							2014	32.1606	644941	2	1	1	16	2	4	5	2	1	5
1	1	2	2	2	1	0	2014	26.816	644941	2	1	1	16	1	6	5	2	1	1
1	2	2	1	2	1	1	2014	29.6691	644941	2	0	0	15	1	4	5	2	2	1
2	2	2	2	2	0	0	2014	34.2703	644941	2	0	0	16	2	5	5	2	2	1
2	2	2	2			0	2014	34.2703	644941	2	0	0	17	2	5	2	2	2	1
2	2	2	2	2	0	0	2014	29.6691	644941	2	0	0	15	1	4	5	2	2	1
1	1	2	2	2	1	0	2014	34.2703	644941	2	0	0	16	2	5	5	2	2	1
1	1	2	1	1	1	1	2014	34.2703	644941	2	0	0	16	2	5	5	2	2	1
1	2	2	2	2	1	0	2014	26.6586	644941	2	1	1	16	1	4	5	1	1	3
1	2	2	2	2	1	0	2014	31.6153	644941	2	0	0	15	1	5	5	2	2	1
							2014	31.6153	644941	2	1	0	16	1	5	5	2	2	1
2	2	2	2	2	0	0	2014	29.6691	644941	2	0	0	15	1	4	5	2	2	1
1	1				1		2014	44.0576	644941	2	0	0	16	2	5	3	2	2	1
		1			1		2014	34.2703	644941	2			20		5	5	2	1	4
							2014	34.2703	644941	2	1	0	16	2	5	5	2	1	1
2	2	2	2	2	0	0	2014	49.0107	644941	2	1	1	17	1	7	5	2	2	1
2	2	2	2	2	0	0	2014	32.1606	644941	2	0	0	15	2	4	5	2	2	1
1	1	1	1	1	1	1	2014	32.1606	644941	2	1	1	21	2	4	1	2	1	6
1	1	2	2	2	1	0	2014	34.4744	644941	2	0	0	17	1	6	3	2	2	1
2	2	2	2	2	0	0	2014	38.1424	644941	2	0	0	15		4	3		2	1
							2014	63.0077	644941	2	1	1	17	1	7	3	2	1	7
							2014	30.7928	644941	2			16	2	5	5	1	2	1
							2014	29.0679	644941	2	1	1	18	2	6	5	2	1	1
1	1	1	1	1	1	1	2014	26.6586	644941	2	1	1	15	1	4	6	1	1	6
1	2	2	1	2	1	1	2014	49.0107	644941	2	1	1	17	1	7	5	2	1	1
1	2	2	2	2	1	0	2014	31.6153	644941	2	0	0	16	1	5	5	2	2	1
2	2	2	2	2	0	0	2014	34.2703	644941	2	0	0	16	2	5	5	2	2	1
							2014	37.3695	644941	2	1	1	16	2	6	3	2	1	1
1	2	2	1	1	1	1	2014	26.816	644941	2	0	0	17	1	6	1	2	1	1
2	2	2	2	2	0	0	2014	29.0679	644941	2	0	0	17	2	6	5	2	2	1
1	1	1	1	1	1	1	2014	26.816	644941	2	1		17	1	6	2	2	1	7
2	2	2	2	2	0	0	2014	26.1184	644941	2	0	0	16	2	6	6	1	2	1
2	2	2	2	2	0	0	2014	26.816	644941	2	0	0	16	1	6	5	2	2	1
2	2	2	2	2	0	0	2014	29.0679	644941	2	1	1	18	2	6	5	2	2	1
2	2	1	2	2	1	0	2014	26.816	644941	2	0	0	17	1	6	5	2	2	1
1	2	2	2	2	1	0	2014	31.6153	646881	2	0	0	16	1	5	5	2	2	1
1	1	1	1	2	1	1	2014	34.2703	646881	2	1	1	16	2	5	5	2	1	7
1	2	2	2	2	1	0	2014	31.6153	646881	2	0	0	15	1	5	6	2	2	1
2	2	2	2	2	0	0	2014	47.7357	646881	2	0	0	19	2	7	5	1	2	1
2	1	2	2	2	1	0	2014	26.6586	646881	2	0	0	16	1	4	6	1	2	1
1	2	2	2	2	1	0	2014	30.7928	646881	2	0	0	17	2	5	6	1	1	1
2	1	2	2	2	1	0	2014	31.6153	646881	2	0	0	15	1	5	5	2	2	1
2	2	2	2	2	0	0	2014	53.1264	646881	2	0	0	17	2	7	5	2	2	1
2	2	2	2	2	0	0	2014	53.1264	646881	2	0	0	19	2	7	2	2	2	1
2	2	2	2	2	0	0	2014	28.4073	646881	2	0	0	15	1	5	5	1	1	2
2	2	2	2	2	0	0	2014	53.1264	646881	2	0	0	18	2	7	5	2	2	1
2	2	2	2	2	0	0	2014	63.0077	646881	2	1	1	19	1	7	3	2	1	5
1	2	2	1	2	1	1	2014	53.1264	646881	2	0	0	17	2	7	6	2	2	1
2	2	1	2	1	1	0	2014	47.7357	646881	2	1	0	17	2	7	6	1	1	1
2	2	2	2	2	0	0	2014	53.1264	646881	2	0	0	17	2	7	5	2	1	1
2	2	2	2	2	0	0	2014	26.1184	646881	2	0	0	16	2	6	6	1	1	1
1	2	2	2	2	1	0	2014	49.0107	646881	2	1	1	18	1	7	5	2	1	7
2	2	2	2	2	0	0	2014	26.1184	646881	2	1	1	17	2	6	6	1	2	1
1	2	1	2	2	1	0	2014	29.0679	646881	2	0	0	18	2	6	5	2	1	1
2	2	2	2	2	0	0	2014	26.816	646881	2	0	0	16	1	6	5	2	2	1
2	2	2	2	2	0	0	2014	34.2703	646881	2	0	0	16	2	5	5	2	2	1
1	1	2	1	1	1	1	2014	44.0576	646881	2	1	1	17		5	3	2	1	1
2	2	2	2	2	0	0	2014	30.7928	646881	2	0	0	15	2	5	6	1	2	1
2	2	2	2	2	0	0	2014	40.6444	646881	2		0	16	1	5	3	2	2	1
2	2	2	1	2	1	1	2014	44.0576	646881	2	1	1	15	2	5		2	1	7
							2014	30.7928	646881	2	0	0	15	2	5	3	1	2	1
							2014	28.4073	646881	2	1	0	16	1	5	3	1	2	1
							2014	30.7928	646881	2			16	2	5	6	1	1	7
2	2	2	2	2	0	0	2014	26.1184	646881	2	0	0	15	2	6	6	1		1
2	2	2	2	2	0	0	2014	44.0576	646881	2	1	0	15	2	5	3	2	2	1
2	2	1	2	2	1	0	2014	28.4073	646881	2	0	0	15	1	5	6	1	1	1
1	2	2	1	2	1	1	2014	49.0107	644436	2	0	0	17	1	7	5	2	2	1
2	2	2	2	2	0	0	2014	26.6586	644436	2	0	0	15	1	4	6	1	2	1
1	2	2	2	2	1	0	2014	29.6691	644436	2	0	0	15	1	4	5	2	2	1
2	2	2	2	2	0	0	2014	29.6691	644436	2	1	1	15	1	4	5	2	2	1
2	2	2	2	2	0	0	2014	26.6586	644436	2	0	0	14	1	4	3	1	2	1
							2014	34.4744	644436	2	0	0	16	1	6	3	2	2	1
1	2	2	2	1	1	0	2014	26.816	644436	2	0	0	17	1	6	5	2	1	1
1	2	2	1	2	1	1	2014	26.816	644436	2	1	0	17	1	6	5	2	1	1
2	2	2	2	2	0	0	2014	34.4744	644436	2	0	0	17	1	6	3	2	2	1
2	2	2	2	2	0	0	2014	26.816	644436	2	0	0	17	1	6	5	2	2	1
2	2	2	2	2	0	0	2014	26.816	644436	2	0	0	16	1	6	2	2	2	1
2	2	1	1	2	1	1	2014	26.816	644436	2	1	0	16	1	6	5	2	2	1
2	2	2	2	2	0	0	2014	29.0679	644436	2	1	1	16	2	6	5	2	2	1
1	2	2	2	2	1	0	2014	68.2989	644436	2	0	0	18	2	7	3	2	2	1
							2014	30.2911	644436	2				1	3		2	2
2	2	2	2	2	0	0	2014	68.2989	644436	2	0	0	17	2	7	3	2	2	1
1	2	2	1	2	1	1	2014	26.816	644436	2	1	0	17	1	6	5	2	1	1
1					1		2014	26.816	644436	2	0	0	16	1	6	5	2	2	1
2	2	2	2	2	0	0	2014	26.816	644436	2	0	0	16	1	6	6	2	2	1
2	2	1	2	2	1	0	2014	26.816	644436	2	0	0	16	1	6	5	2	2	1
1	1	2	1	2	1	1	2014	32.1606	644436	2	1	1	15	2	4	5	2	2	1
2	2	2	2	2	0	0	2014	26.816	644436	2	0	0	16	1	6	5	2	2	1
1					1		2014	31.6153	644436	2	0	0	15		5	2		2	1
2	2	2	2	2	0	0	2014	34.4744	644436	2	0	0	16	1	6	3	2	2	1
1	2	2	2	2	1	0	2014	31.6153	644436	2	0	0	15	1	5	5	2	2	1
1	2	2	2	2	1	0	2014	31.6153	644436	2	0	0	16	1	5	5	2	2	1
2	2	2	2	2	0	0	2014	34.2703	644436	2	0	0	15	2	5	5	2	2	1
2	2	2	2	2	0	0	2014	34.2703	644436	2	1	1	15	2	5	5	2	1	1
2	2	2	2	2	0	0	2014	29.6691	644436	2	0	0	15	1	4	5	2	2	1
1	2	2	1	2	1	1	2014	29.6691	644436	2	0	0	15	1	4	5	2	2	1
2	2	2	2	2	0	0	2014	38.1424	644436	2	1	0	15	1	4	3	2	1	1
2	2	2	2	2	0	0	2014	29.6691	644436	2	0	0	15	1	4	5	2	2	1
2	2	2	2	2	0	0	2014	28.8973	644436	2	0	0	15	2	4	6	1	2	1
2	1	2	2	1	1	0	2014	31.6153	644436	2	0	0	16	1	5	5	2	2	1
2	2	2	2	2	0	0	2014	32.1606	644436	2	1	0	15	2	4	5	2	2	1
2	2	2	2	2	0	0	2014	37.3695	644436	2	0	0	17		6	3	2	1	1
2	2	2	2	2	0	0	2014	53.1264	644436	2	0	0	17	2	7	5	2	2	1
1	2	2	2	2	1	0	2014	32.1606	644436	2	1	1	14	2	4	5	2	1	1
2	2	2	2	2	0	0	2014	38.1424	644436	2	0	0	16	1	4	3	2	2	1
2	2	2	2	2	0	0	2014	29.6691	644436	2	0	0	14	1	4	2	2	2	1
1	1	1	1	1	1	1	2014	29.6691	644436	2	1	1	15	1	4	5	2	1	5
2	2	2	2	2	0	0	2014	32.1606	644436	2	0	0	15	2	4	5	2	2	1
							2014	53.1264	644436	2			18		7	5	2	1	6
							2014	22.2792	644436	2	1	1	21	1	1		1	1	7
2	2	2	1	2	1	1	2014	32.1606	644436	2	1	0	14	2	4	5	2	2	1
2	2	2	2	2	0	0	2014	29.6691	644436	2	1	0	14	1	4	6		2	1
							2014	29.6691	644436	2	1	1	15	1	4	5	2	1	1
1	2	2	2	2	1	0	2014	29.6691	644436	2	1	1	14	1	4	5	2	1	1
1	2	2	2	2	1	0	2014	29.6691	644436	2	0	0	15	1	4	5	2	2	1
2	2	2	2	2	0	0	2014	29.6691	644436	2	1	1	15	1	4	5	2	2	1
2	2	2	2	2	0	0	2014	26.816	644436	2	0	0	17	1	6	4	2	2	1
2	1	2	2	2	1	0	2014	29.0679	644436	2	0	0	16	2	6	5	2	2	1
2	2	2	2	2	0	0	2014	26.816	644436	2	1	0	17	1	6	5	2	2	1
2	2	2	2	2	0	0	2014	29.0679	644436	2	0	0	16	2	6	5	2	2	1
2	2	2	2	2	0	0	2014	29.0679	644436	2	0	0	16	2	6	2	2	2	1
2	2	2	2	2	0	0	2014	49.0107	644436	2	0	0	17	1	7	5	2	2	1
2	2	2	2	2	0	0	2014	34.2703	644436	2	0	0	15	2	5	2	2	2	1
1	2	2	2	2	1	0	2014	29.0679	644436	2	0	0	17	2	6	5	2	2	1
1	2	2	2	2	1	0	2014	31.6153	644436	2	0	0	15	1	5	2	2	2	1
							2014	29.0679	644436	2	0	0	17	2	6	5	2	2	1
2	2	2	2	2	0	0	2014	29.0679	644436	2	1	1	16	2	6	6		2	1
2	1	2	2	2	1	0	2014	49.0107	644436	2	0	0	17	1	7	2	2	2	1
2	2	2	1	2	1	1	2014	26.816	644436	2	1	1	17	1	6	5	2	1	1
2	2	2	2	2	0	0	2014	26.816	644436	2	0	0	16	1	6	5	2	2	1
1	2	2	1	2	1	1	2014	49.0107	644436	2	0	0	18	1	7	5	2	1	1
1	2	1	2	1	1	0	2014	68.2989	644436	2	0	0	18	2	7	3	2	2	1
2	1	2	2	1	1	0	2014	34.4744	644436	2	0	0	16	1	6	3	2	2	1
2	2	2	2	2	0	0	2014	38.1424	644436	2	0	0	15	1	4	3	2	2	1
2	2	2	2	2	0	0	2014	31.6153	644436	2	0	0	16	1	5	5	2	2	1
2	2	2	2	2	0	0	2014	28.8973	644436	2	0	0	14	2	4	5	1	2	1
2	2	2	2	2	0	0	2014	29.6691	644436	2	0	0	14	1	4	5	2	2	1
1	2	1	1	1	1	1	2014	31.6153	644436	2	0	0	15	1	5	5	2	2	1
2	2	2	2	2	0	0	2014	40.6444	644436	2	1	1	16	1	5	3	2	2	1
2	2	2	1	2	1	1	2014	28.4073	644436	2	0	0	15	1	5	6	1	1	1
1	2	2	2	2	1	0	2014	29.0679	644436	2	0	0	16	2	6	5	2	2	1
2	2	2	2	2	0	0	2014	34.2703	644436	2	0	0	16	2	5	5	2	2	1
2	2	2	1	1	1	1	2014	32.1606	644436	2	1	1	15	2	4	5	2	1	1
1	2	2	2	2	1	0	2014	26.816	641551	2	0	0	16	1	6	5	2	1	1
1	2	2	2	2	1	0	2014	29.0679	641551	2	1	0	17	2	6	5	2	1	1
2	2	2	2	2	0	0	2014	24.095	641551	2	0	0	16	1	6	6	1	2	1
2	1	2	2	2	1	0	2014	30.7928	641551	2	0	0	15	2	5	5	1	2	1
1	2	2	2	2	1	0	2014	34.2703	641551	2	0	0	16	2	5	5	2	2	1
1	2	2	2	2	1	0	2014	26.816	641551	2	0	0	17	1	6	5	2	2	1
2	1	2	2	2	1	0	2014	34.2703	641551	2			15	2	5	5	2	1	3
2	2	2	2	2	0	0	2014	44.0576	641551	2	0	0	16	2	5	3	2	2	1
2	2	1	1	1	1	1	2014	34.2703	641551	2	1	1	15	2	5	5	2	1	1
2	2	2	2	2	0	0	2014	26.1184	641551	2	0	0	17	2	6	6	1	2	1
2	2	1	2	2	1	0	2014	32.1606	641551	2	0	0	16	2	4	6	2	2	1
1	1	2	2	2	1	0	2014	28.8973	641551	2	0	0	16		4		1	2	1
							2014	28.8973	641551	2	0	0	15	2	4	6	1	2	1
1	2	2	2	2	1	0	2014	34.2703	641551	2	0	0	16	2	5	5	2	1	1
1	2	2	2	1	1	0	2014	49.0107	641551	2	1	1	18	1	7	5	2	1	6
2	2	2	1	2	1	1	2014	32.1606	641551	2	1	1	16	2	4	5	2	1	1
2	2	2	2	2	0	0	2014	34.2703	641551	2	0	0	16	2	5	5	2	2	1
2	2	2	2	2	0	0	2014	26.6586	641551	2	0	0	15	1	4	5	1	2	1
2	2	2	2	2	0	0	2014	26.816	641551	2	0	0	16	1	6	5	2	2	1
							2014	29.0679	641551	2	0	0	17	2	6	5	2	2	1
1	2	2	2	1	1	0	2014	29.0679	641551	2	0	0	16		6	2	2	1	3
2	2	2	2	2	0	0	2014	44.0376	641551	2	0	0	18	1	7		1	1	1
2	2	2	2	2	0	0	2014	24.095	641551	2	0	0	16	1	6	6	1	2	1
1	2	2	2	2	1	0	2014	28.4073	641551	2	0	0	15	1		6	1	2	1
							2014	32.1606	641551	2	1	1	15	2	4	5	2	1	3
2	2	2	2	2	0	0	2014	32.1606	641551	2	0	0	15	2	4	6	2	2	1
1	2	1	2	2	1	0	2014	29.6691	641551	2	0	0	15	1	4	5	2	2	1
2	2	2	2	2	0	0	2014	32.1606	641551	2	0	0	15	2	4	5		2	1
2	2	2	2	2	0	0	2014	47.7357	641551	2	0	0	17	2	7	5	1	1	1
							2014	32.1606	641551	2	0	0	16	2	4	5	2	2	1
2	2	2	2	2	0	0	2014	26.816	641551	2	1	1	16	1	6	2	2	1	1
2	2	2	2	2	0	0	2014	53.1264	641551	2	0	0	17	2	7	5	2	1	1
2	2	2	2	2	0	0	2014	26.1184	641551	2	0	1	17	2	6	6	1	1	1
2	2	2	2	2	0	0	2014	24.095	641551	2	0	0	17	1	6	6	1	2	1
2	2	2	2	2	0	0	2014	30.7928	641551	2	0	0	17	2	5		2	2	1
2	2	2	2	2	0	0	2014	29.0679	641551	2	0	0	17	2	6	5	2	2	1
1	1	2	1	2	1	1	2014	24.095	641551	2	0	0	17	1	6	5	1	1	1
1	2	2	2	2	1	0	2014	47.7357	641551	2	0	0	18	2	7	6	1	2	1
2	2	2	2	2	0	0	2014	29.0679	641551	2	0	0	17	2	6	5	2	2	1
2	2	2	2	2	0	0	2014	31.6153	641551	2	0	0	16	1	5	5	2	2	1
2	2	2	2	2	0	0	2014	26.1184	641551	2	0	0	16	2	6	6	1	2	1
1	1	2	2	2	1	0	2014	31.6153	641551	2	0	0	16	1	5	6	2	2	1
2	1	2	1	2	1	1	2014	32.1606	641551	2	0	0	16	2	4	5	2	2	1
2	2	2	2	2	0	0	2014	32.1606	641551	2	0	0	14	2	4	5	2	2	1
1	2	2	2	2	1	0	2014	29.6691	644941	2	1	1	15	1	4	5	2	1	1
2	2	2	2	2	0	0	2014	32.1606	644941	2	0	0	15	2	4	2	2	2	1
2	2	2	2	2	0	0	2014	32.1606	644941	2	0	0	16	2	4	5	2	2	1
2	2	2	2	2	0	0	2014	29.6691	644941	2	0	0	15	1	4	5	2	2	1
2	2	2	2	2	0	0	2014	29.6691	644941	2	0	0	14	1	4	5	2	2	1
1	2	2	2	2	1	0	2014	32.1606	644941	2	0	0	15	2	4	5	2	2	1
1	2	2	1	2	1	1	2014	29.6691	644941	2	0	0	14	1	4	5	2	2	1
2	2	2	2	2	0	0	2014	29.6691	644941	2	0	0	15	1	4	5	2	2	1
2	2	2	2	2	0	0	2014	29.6691	644941	2	0	0	14	1	4	5	2	2	1
2	2	2	2	2	0	0	2014	41.3454	644941	2	0	0	14	2	4	3	2	2	1
							2014	29.6691	644941	2	0	0	15	1	4	5	2	2	1
2	2	2	2	2	0	0	2014	26.816	644941	2	0	0	16	1	6	5	2	2	1
2	2	2	2	2	0	0	2014	30.7928	644941	2	0	0	16	2	5	6	1	2	1
2	2	2	2	2	0	0	2014	29.6691	644941	2	1	1	15	1	4	5	2	2	1
1	2	2	1	1	1	1	2014	49.0107	644941	2	1	1	17	1	7	5	2	2	1
2	2		2	2		0	2014	29.6691	644941	2	1	0	15	1	4	5	2	2	1
1		2	2	2	1	0	2014	29.6691	644941	2	0	0	14	1	4	5	2	2	1
2	2	2	2	2	0	0	2014	40.6444	644941	2	0	0	16	1	5	3	2	2	1
							2014	31.6153	644941	2	0	0	16	1	5	5	2	2	1
2	2	2	2	2	0	0	2014	28.8973	641453	2	0	0	15	2	4	6	1	2	1
1	2	2	2	2	1	0	2014	32.1606	641453	2	1	1	14	2	4	5	2	1	5
2	2	2	2	2	0	0	2014	41.3454	641453	2	0	0	14	2	4	3	2	2	1
1	2	2	2	2	1	0	2014	29.6691	641453	2	0	0	15	1	4	5	2	2	1
2	2	2	2	2	0	0	2014	29.6691	641453	2	1	0	16	1	4	5	2	1	1
2	2	2	2	2	0	0	2014	41.3454	641453	2	0	0	15	2	4	3	2	2	1
2	2	2	2	2	0	0	2014	32.1606	641453	2	0	0	16	2	4	6	2	2	1
2	2	2	2	2	0	0	2014	32.1606	641453	2	0	0	16	2	4	6	2	2	1
1	1	1	1	1	1	1	2014	41.3454	641453	2	0	0	15	2	4	3	2	2	1
2	2	2	2	2	0	0	2014	26.816	641453	2	0	0	17	1	6	5	2	2	1
2	2	2	2	1	1	0	2014	26.816	641453	2	0	0	16	1	6	5	2	2	1
1	2	2	1	1	1	1	2014	26.816	641453	2	1	0	17	1	6	6	2		1
2	1	2	2	2	1	0	2014	31.6153	641453	2	0	0	15	1	5	5	2	2	1
1	2	2	1	2	1	1	2014	31.6153	641453	2	0	0	16	1	5	5	2	2	1
2	2	2	2	2	0	0	2014	40.6444	641453	2	0	0	16	1	5	3	2	2	1
1	2	2	1	2	1	1	2014	31.6153	641453	2	1	0	16	1	5	5	2	2	1
2	2	2	2	2	0	0	2014	34.2703	641453	2	0	0	16	2	5	5	2	2	1
2	2	2	2	2	0	0	2014	26.816	641453	2	1	1	16	1	6	5	2	2	1
2	2	2	2	2	0	0	2014	49.0107	641453	2	0	0	18	1	7	2	2	1	1
1	1	2	2	2	1	0	2014	44.0576	641453	2	0	0	16	2	5	3	2	1	1
1	2	2	2	2	1	0	2014	44.0376	641453	2	0	0	19	1	7	6	1	2	1
1	1	2	2	1	1	0	2014	29.0679	641453	2	0	0	17	2	6	5	2	2	1
1	2	2	1	2	1	1	2014	29.0679	641453	2	0	0	17	2	6	5	2	2	1
2	2	2	2	2	0	0	2014	29.0679	641453	2	0	0	17	2	6	5	2	2	1
2	1	2	2	2	1	0	2014	29.0679	641453	2	1	1	17	2	6	5	2	1	1
2	2	2	2	2	0	0	2014	29.0679	641453	2	0	0	16	2	6	5	2	2	1
2	2	2	2	2	0	0	2014	29.0679	641453	2	0	0	16	2	6	5	2	2	1
2	2	2	2	2	0	0	2014	34.2703	641453	2	0	0	16	2	5	5	2	2	1
2	2	2	2	2	0	0	2014	29.0679	641453	2	0	0	17	2	6	5	2	2	1
1			1		1	1	2014	29.0679	641453	2	0	0	16	2	6	5	2	2	1
2	2	2	2	2	0	0	2014	29.0679	641453	2	0	0	17	2	6	5	2	2	1
2	2	2	2	2	0	0	2014	26.816	641453	2	0	0	16	1	6	5	2	2	1
1	2	2	2	2	1	0	2014	31.6153	641453	2	0	0	15	1	5	5	2	1	1
							2014	34.2703	641453	2	0	0	16	2	5	5	2	2	1
1	2	2	1	2	1	1	2014	53.1264	641453	2	1	0	18	2	7	5	2	1	1
2	2	2	2	2	0	0	2014	30.7928	641453	2	0	0	15	2	5	5	1	2	1
2	2	2	2	2	0	0	2014	34.2703	641453	2	1	1	15	2	5	5	2	1	1
1	2	1	1	1	1	1	2014	34.2703	641453	2	1	1	16	2	5	5	2	1	1
2	2	2	2	2	0	0	2014	30.7928	641453	2	1	0	15	2	5	5	1	2	1
2	2	2	2	2	0	0	2014	34.2703	641453	2	1	1	16	2	5	5	2	1	6
2	2	2	2	2	0	0	2014	32.1606	641453	2	0	0	15	2	4	5	2	1	1
2	2	2	2	2	0	0	2014	53.1264	641453	2	0	0	17	2	7	5	2	2	1
2	2	2	2	2	0	0	2014	32.1606	641453	2	0	0	15	2	4	5	2	2	1
2	2	2	2	2	0	0	2014	30.7928	641453	2	0	0	15	2	5	5	1	2	1
							2014	53.1264	641453	2	0	0	18	2	7	5	2	2	1
2	2	2	2	2	0	0	2014	26.1184	641453	2	0	0	17	2	6	6	1	2	1
1	1	2	1	1	1	1	2014	31.6153	641453	2	0	0	16	1	5	5	2	2	1
1	1	2	2	2	1	0	2014	34.2703	641453	2	0	0	15	2	5	5	2	2	1
1	2	2	2	2	1	0	2014	26.816	641453	2	1	0	16	1	6	5	2	1	1
2	2	1	2	2	1	0	2014	34.2703	641453	2	0	0	16	2	5	5	2	2	1
2	2	2	2	2	0	0	2014	29.0679	641453	2	0	0	17	2	6	5	2	2	1
2	2	2	2	2	0	0	2014	29.0679	641453	2	0	0	16	2	6	5	2	2	1
1	2	2	2	2	1	0	2014	26.1184	641453	2	1	1	16	2	6	5	1	1	1
1	1	2	2	2	1	0	2014	34.2703	641453	2	1	0	16	2	5	5	2	1	1
2	2	2	2	2	0	0	2014	34.2703	641453	2	0	0	16	2	5	5	2	2	1
2	2	2	2	2	0	0	2014	37.3695	641453	2	1	1	17	2	6	3	2	1	1
							2014	26.1184	641453	2	0	0	17	2	6	6	1	2	1
2	2	2	2	2	0	0	2014	32.1606	641453	2	0	0	14	2	4	5	2	2	1
2	2	2	2	2	0	0	2014	29.6691	641453	2	0	0	15	1	4	5	2	2	1
1	2	2	2	2	1	0	2014	28.8973	641453	2	1	0	14	2	4	5	1	2	1
1	2	1	1	2	1	1	2014	32.1606	641453	2	0	0	15	2	4	5	2	2	1
2	2	2	2	2	0	0	2014	41.3454	641453	2	0	0	14	2	4	3	2	2	1
2	2	2	2	2	0	0	2014	32.1606	641453	2	0	0	15	2	4	5	2	2	1
1	2	1	2	2	1	0	2014	32.1606	641453	2	0	0	14	2	4	5	2	2	1
2	2	2	2	2	0	0	2014	38.1424	641453	2	0	0	15	1	4	3	2	1	1
2	2	2	2	2	0	0	2014	49.0107	641453	2	0	0	16		7	1		2	3
							2014	32.1606	641453	2	0	0	15	2	4	5	2	2	1
2	2	2	2	2	0	0	2014	32.1606	641453	2	1	1	14	2	4	4	2	1	1
1	2	2	1	2	1	1	2014	32.1606	641453	2	1	1	15	2	4	5	2	1	3
2	2	2	2	2	0	0	2014	32.1606	641453	2	0	0	15	2	4	5	2	2	1
2	2	2	2	2	0	0	2014	53.1264	641453	2	0	0	19	2	7	5	2	2	1
2	2	2	2	2	0	0	2014	29.0679	641453	2	0	0	17	2	6	5	2	2	1
2	2	2	2	2	0	0	2014	53.1264	641453	2	0	0	19	2	7	5	2	2	1
2	2	2	2	2	0	0	2014	26.816	641453	2	0	0	17	1	6	2	2	2	1
2	2	2	2	2	0	0	2014	53.1264	641453	2	1	1	11	2	7	6	2	1	3
2	2	2	2	2	0	0	2014	47.7357	641453	2	0	0	19	2	7	6	1	2	1
2	2	2	2	2	0	0	2014	68.2989	641453	2	0	0	19	2	7	3	2	1	1
2	2	2	2	2	0	0	2014	29.6691	641453	2	0	0	14	1	4	2	2	2	1
2	2	2	2	2	0	0	2014	26.6586	641453	2	0	0	15	1	4	1	1	2	1
2	2	2	2	2	0	0	2014	26.6586	641453	2	0	0	14	1	4	6	1	2	1
1	2	2	2	2	1	0	2014	26.6586	641453	2	0	0	16	1	4	6	1	2	1
2	2	2	2	2	0	0	2014	31.6153	641453	2	0	0	16	1	5	5	2	2	1
2	2	2	2	2	0	0	2014	29.6691	641453	2	0	0	15	1	4	5	2	2	1
1	2	2	2	2	1	0	2014	38.1424	641453	2	0	0	16	1	4	3	2	2	1
2	2	2	2	2	0	0	2014	31.6153	641453	2	0	0	15	1	5	5	2	2	1
2	2	2	2	2	0	0	2014	29.6691	641453	2	0	0	15	1	4	5	2	2	1
2	2	2	2	2	0	0	2014	31.6153	641453	2	0	0	16	1	5	5	2	1	1
2	1	2	2	2	1	0	2014	24.095	641453	2	1	0	17	1	6	6	1	1	1
2	2	2	2	2	0	0	2014	24.095	646761	2	0	0	16	1	6	6	1	2	1
2	2	2	2	2	0	0	2014	26.816	646761	2	0	0	17	1	6	5	2	2	1
1	2	2	1	2	1	1	2014	26.816	646761	2	1	0	16	1	6	5	2	1	1
1	2	2	1	2	1	1	2014	29.0679	646761	2	0	0	16	2	6	5	2	2	1
2	2	2	2	2	0	0	2014	68.2989	646761	2	0	0	18	2	7	3	2	2	1
1	1	1	1	1	1	1	2014	29.0679	646761	2	1	1	17	2	6	5	2	2	1
2	2	2	2	2	0	0	2014	28.4073	646761	2	0	0	16	1	5	6	1	2	1
2	2	2	2	2	0	0	2014	29.0679	646761	2	0	0	9	2	8	2	2	1	1
2	2	2	1	2	1	1	2014	26.1184	646761	2	1	1	17	2	6	5	1	2	1
2	2	2	2	2	0	0	2014	26.816	646761	2	0	0	16	1	6	5	2	2	1
1	2	2	1	2	1	1	2014	26.816	646761	2	1	1	16	1	6	5	2	2	1
2	2	2	2	2	0	0	2014	24.095	646761	2	1	0	16	1	6	6	1	2	1
2	2	2	2	2	0	0	2014	24.095	646761	2	0	0	16	1	6	6	1	2	1
2	2	2	2	2	0	0	2014	44.0376	646761	2	1	1	18	1	7	5	1	2	1
2	2	2	2	2	0	0	2014	34.4744	646761	2	0	0	17	1	6	3	2	2	1
2	1	2	2	2	1	0	2014	26.6586	646761	2	1	0	15	1	4	6	1	2	1
1	1	1	1	1	1	1	2014	28.8973	646761	2	0	1	21	2	8	6	1	1	7
2	2	2	2	2	0	0	2014	28.8973	646761	2	0	0	15	2	4	6	1	2	1
2	2	2	2	2	0	0	2014	26.6586	646761	2	0	0	15	1	4	6	1	2	1
1	2	2	2	2	1	0	2014	28.8973	646761	2	0	0	14	2	4	6	1	2	1
1	2	2	2	1	1	0	2014	26.6586	646761	2	0		16	1	4	6	1	2	1
2	2	2	2	2	0	0	2014	26.6586	646761	2	0	0	14	1	4	5	1	2	1
2	2	2	2	1	1	0	2014	41.3454	646761	2	0	0	14	2	4	3	2	2	1
							2014	41.3454	646761	2	0	0	15	2	4	3	2	2	1
2	1	2	2	1	1	0	2014	49.0107	646761	2	0	0	18	1	7	5	2	2	1
2	2	2	2	2	0	0	2014	53.1264	646761	2	0	0	17	2	7	5	2	2	1
2	2	2	2	2	0	0	2014	44.0376	646761	2	0	0	18	1	7	5	1	2	1
2	2	2	2	2	0	0	2014	47.7357	646761	2	0	0	18	2	7	6	1	2	1
1	2	2	1	2	1	1	2014	44.0376	646761	2	1	1	18	1	7	6	1	1	1
							2014	37.3695	646761	2			17	2	6	3	2	2	1
2	2	2	2	2	0	0	2014	26.816	646761	2	0	0	16	1	6	5	2	2	1
2	2	2	2	2	0	0	2014	68.2989	646761	2	0	0	17	2	7	3	2	2	1
2	2	2	2	2	0	0	2014	49.0107	646761	2	0	0	18	1	7	5	2	2	1
2	2	2	2	2	0	0	2014	24.095	646761	2	0	0	16	1	6	3	1	2	1
2	2	2	2	2	0	0	2014	26.1184	646761	2	0	0	16	2	6	2	1	2	1
1	2	2	2	2	1	0	2014	26.816	646761	2	0	0	17	1	6	5	2	2	1
2	2	2	2	2	0	0	2014	24.095	646761	2	0	0	17		6	5	1	2	1
2	1	2	2	2	1	0	2014	29.0679	646761	2	0	0	16	2	6	5	2	2	1
2	2	2	2	2	0	0	2014	29.0679	646761	2	0	0	17	2	6	5	2	1	1
2	2	1	2	2	1	0	2014	26.816	646761	2	1	0	17	1	6	5	2	2	1
2	2	2	2	2	0	0	2014	26.816	646761	2	0	0	17	1	6	5	2	1	1
2	2	2	2	2	0	0	2014	37.3695	646761	2	0	0	16	2	6	3	2	2	1
1	2	2	2	1	1	0	2014	26.1184	646761	2	1	0	16	2	6	4	1	2	1
1	2	2	2	1	1	0	2014	26.816	646761	2	0	0	16	1	6	5	2	2	1
1	1	2	1	2	1	1	2014	26.816	646761	2	0	0	16	1	6	5	2	2	1
1	1	2	1	2	1	1	2014	26.1184	646761	2	1	1	17	2	6	6	1	1	1
2	2	2	2	2	0	0	2014	26.816	646761	2	0	0	16	1	6	5	2	2	1
2	2	2	2	2	0	0	2014	29.0679	646761	2	0	0	18	2	6	2	2	2	1
2	2	2	2	2	0	0	2014	28.8973	646761	2	0	0	15	2	4	6	1	2	1
1	2	2	2	2	1	0	2014	29.6691	646761	2	0	0	14	1	4	5	2	2	1
1	2	2	2	2	1	0	2014	28.8973	646761	2	0	0	16	2	4	6	1	2	1
							2014	32.1606	646761	2		0	14	2	4	5	2	1	1
1	2	2	1	2	1	1	2014	30.7928	646761	2	0	0	15	2	5	6	1	2	1
1	2	2	1	2	1	1	2014	44.0376	646761	2	0	0	18	1	7	5	1	2	1
2	2	2	2	2	0	0	2014	26.6586	646761	2	0	0	15	1	4	6	1	2	1
2	2	2	2	1	1	0	2014	26.816	646761	2	0	0	17	1	6	6	2	2	1
2	2	2	2	2	0	0	2014	49.0107	646761	2	1	0	17	1	7	5	2	2	1
2	2	2	2	2	0	0	2014	41.3454	646761	2	0	0	15	2	4	3	2	2	1
2	2	1	2	1	1	0	2014	29.6691	646761	2	1	1	14	1	4	5	2	1	1
							2014	41.3454	646761	2	0	0	14	2	4	3	2	2	1
							2014	30.7928	646761	2			15	2	5	6	1	2	1
1	2	2	1	2	1	1	2014	53.1264	646761	2	1	1	18	2	7	5	2	2	1
							2014	31.6153	646761	2	0	0	16	1	5	5	2	1	1
2	2	2	2	2	0	0	2014	44.0376	646761	2	0	0	18	1	7	6	1	2	1
2	2	2	2	2	0	0	2014	34.4744	646761	2	0	0	17		6	3	2	1	1
2	2	2	2	2	0	0	2014	28.4073	646761	2	1	1	15	1	5	5	1	2	1
1	2	2	2	2	1	0	2014	29.0679	646761	2	0	0	16	2	6	5	2	2	1
2	2	2	2	2	0	0	2014	28.4073	646761	2	0	0	15	1	5	5	1	2	1
1	1	1	2	2	1	0	2014	28.4073	646761	2	0	0	16	1	5	5	1	2	1
2	2	2	2	2	0	0	2014	29.0679	646761	2		0	17	2	6	5	2	2	1
2	2	2	2	2	0	0	2014	63.0077	646761	2	0	0	17	1	7	3	2	1	1
2	1	2	2	2	1	0	2014	29.6691	643436	2	1	0	14	1	4	5	2	2	1
2	2	2	2	2	0	0	2014	47.7357	643436	2	0	1	18	2	7	5	1	1	1
1	2	2	2	2	1	0	2014	29.6691	643436	2	1	0	15	1	4	5	2	2	1
2	2	2	1	2	1	1	2014	29.6691	643436	2	0	0	14	1	4	4	2	2	1
2	2	2	2	2	0	0	2014	29.6691	643436	2	1	1	15	1	4	1	2	1	1
2	2	2	2	2	0	0	2014	29.6691	643436	2	0	0	15	1	4	5	2	2	1
2	2	2	2	2	0	0	2014	37.3695	643436	2	0	0	16	2	6	3	2	2	1
1	2	2	2	2	1	0	2014	41.3454	643436	2	0	0	15	2	4	3	2	2	1
2	2	2	1	2	1	1	2014	32.1606	643436	2	0	0	15	2	4	5	2	1	1
2	2	2	2	2	0	0	2014	26.6586	643436	2	0	0	14	1	4	6	1	2	1
							2014	40.6444	643436	2	0	0	17		5	3	2	2
1	1	1	1	1	1	1	2014	44.0576	643436	2	0	0	16	2	5	3		2	1
1	1	2	1	2	1	1	2014	28.4073	643436	2	0	0	16	1	5	6	1	2	1
2	2	2	2	2	0	0	2014	31.6153	643436	2	0	0	15	1	5	5	2	2	1
							2014	34.2703	643436	2	0	0	15	2	5	5	2	2	1
1	2	2	1	2	1	1	2014	34.2703	643436	2	1	1	16	2	5	5	2	1	5
2	1	2	2	2	1	0	2014	30.7928	643436	2	1	1	15	2	5	6	1	1	2
2	2	2	2	2	0	0	2014	34.2703	643436	2	1	0	17	2	5	5	2	1	1
1	1		1		1	1	2014	40.6444	643436	2	0	0	15	1	5	3	2	2	1
2	2	2	2	2	0	0	2014	31.6153	643436	2	0	0	16	1	5	5	2	2	1
1	2	2	2	2	1	0	2014	31.6153	643436	2	0	0	16	1	5	5	2	2	1
2	2	2	2	2	0	0	2014	44.0576	643436	2	0	0	16	2	5	3	2	2	1
2	2	2	2	2	0	0	2014	28.4073	643436	2	0	0	15	1	5	6	1	2	1
							2014	28.8973	643436	2	1	1	15	2	4	5	1	1	1
2	2	2	2	2	0	0	2014	38.1424	643436	2	0	0	14	1	4	3	2	2	1
2	2	2	2	2	0	0	2014	41.3454	643436	2	0	0	15	2	4	3	2	2	1
2	2	2	2	2	0	0	2014	41.3454	643436	2	1	0	15	2	4	3	2	2	1
1	2	2	2	2	1	0	2014	29.6691	643436	2	0	0	15	1	4	5	2	2	1
2	2	2	2	2	0	0	2014	38.1424	643436	2	0	0	14	1	4	3	2	2	1
1	2	2	1	2	1	1	2014	29.6691	643436	2	0	0	16	1	4	5	2	1	1
1	2	2	2	2	1	0	2014	29.6691	643436	2	1	0	15	1	4	6	2	1	1
2	2	2	2	2	0	0	2014	30.7928	643436	2	0	0	15	2	5	6	1	1	1
1	2	2	2	2	1	0	2014	34.2703	643436	2	1	0	15	2	5	6	2	1	2
2	2	2	2	2	0	0	2014	44.0576	643436	2	0	0	16	2	5	3	2	1	7
2	2	2	2	2	0	0	2014	34.2703	643436	2	0	0	16	2	5	5	2	1	1
2	2	2	2	2	0	0	2014	34.4744	643436	2	0	0	17	1	6	3	2	2	1
							2014	40.6444	643436	2	1	1	16	1	5	3	2	1	1
2	2	2	2	2	0	0	2014	40.6444	643436	2	0	0	15	1	5	3	2	2	1
1	2	2	1	2	1	1	2014	31.6153	643436	2	1	1	15	1	5	6	2	1	4
2	1	1	2	2	1	0	2014	40.6444	643436	2	0	0	16	1	5	3	2	2	1
1	2	2	2	2	1	0	2014	37.3695	643436	2	0	0	17	2	6	3	2	2	1
2	2	2	2	2	0	0	2014	34.4744	643436	2	0	0	16	1	6	3	2	2	1
2	1	2	1	2	1	1	2014	24.095	643436	2	0	0	17	1	6	6	1	2	1
2	2	2	2	2	0	0	2014	31.6153	643436	2	1	0	16	1	5	5	2	1	1
2	2	2	2	2	0	0	2014	38.1424	643436	2	0	0	14	1	4	3	2	2	1
1	2	2	2	2	1	0	2014	31.6153	643436	2	0	0	16	1	5	5	2	2	1
2	2	2	2	2	0	0	2014	40.6444	643436	2	0	0	15	1	5	3	2	2	1
2	2	2	2	2	0	0	2014	37.3695	643436	2	0	0	16	2	6	3	2	2	1
1	2	2	2	2	1	0	2014	29.0679	643436	2	0	0	16	2	6	5	2	2	1
2	2	2	2	2	0	0	2014	29.0679	643436	2	0	0	17	2	6	5	2	2	1
2	2	2	1	2	1	1	2014	29.0679	643436	2	1	0	17	2	6	5	2	1	1
2	2	2	1	2	1	1	2014	44.0576	643436	2	0	0	16	2	5	3		2	1
1	1	2	2	2	1	0	2014	32.1606	643436	2	1	1	15	2	4	6	2	1	2
1	2	2	1	1	1	1	2014	53.1264	643436	2	1	0	19	2	7	5	2	1	1
2	2	2	2	2	0	0	2014	44.0576	643436	2	0	0	15	2	5	3	2	2	1
1	2	2	2	2	1	0	2014	29.0679	643436	2	0	0	17	2	6	5	2	1	1
							2014	34.4744	643436	2	0	0	17	1	6	3	2	2	1
1	2	2	2	2	1	0	2014	26.1184	643436	2	1	0	17	2	6	6	1	1	1
2	2	2	2	2	0	0	2014	31.6153	643436	2	0	0	16	1	5	5		2	1
1	2	2	2	2	1	0	2014	29.6691	643436	2	0	0	15	1	4	1	2	2	1
2	2	2	2	2	0	0	2014	29.6691	643436	2	1	0	15	1	4	1	2	1	1
1			1	1	1	1	2014	32.1606	643436	2	1	1	14	2	4	5	2	2	1
							2014	44.0576	643436	2			15	2	5	3		1
2	2	2	2	2	0	0	2014	32.1606	643436	2	0	0	14	2	4	5	2	1	1
1	1	2	1	2	1	1	2014	34.2703	643436	2	1	1	15	2	5	6	2	2	1
							2014	29.6691	643436	2	0	0	15	1	4	5	2	1	1
1	1	2	2	2	1	0	2014	29.6691	643436	2	0	0	15	1	4	5	2	1	2
2	2	2	2	2	0	0	2014	68.2989	643436	2	0	0	18	2	7	3	2	2	1
2	2	2	2	2	0	0	2014	29.0679	643436	2	1	0	17	2	6	5	2	1	1
1	2	2	2	2	1	0	2014	26.816	643436	2	0	0	16	1	6	5	2	1	1
2	2	2	2	2	0	0	2014	26.1184	643839	2	0	0	16	2	6		1	1	1
2	2	2	2	2	0	0	2014	29.6691	643839	2	0	0	15	1	4	5	2	2	1
2	2	2	2	2	0	0	2014	29.6691	643839	2	0	0	14	1	4	5	2	2	1
2	2	2	2	2	0	0	2014	31.6153	643839	2	1	1	16	1	5	5	2	2	1
2	2	2	2	2	0	0	2014	31.6153	643839	2	1	1	16	1	5	5	2	1	1
1	1	1	1	1	1	1	2014	32.1606	643839	2	1	1	15	2	4	1	2	2	1
2	2	2	2	2	0	0	2014	26.816	643839	2	0	0	16	1	6	5	2	2	1
1	1	2	2	2	1	0	2014	32.1606	643839	2	0	0	15	2	4	5	2	2	1
1	2	2	2	2	1	0	2014	32.1606	643839	2	0	0	15	2	4	5	2	2	1
1	2	2	2	2	1	0	2014	29.0679	643839	2	1	1	18	2	6	5	2	1	6
2	2	2	2	2	0	0	2014	31.6153	643839	2	0	0	16	1	5	5	2	2	1
2	2	2	2	2	0	0	2014	29.6691	643839	2	1	1	14	1	4	5	2	2	1
1	2	2	2	2	1	0	2014	32.1606	643839	2	0	0	14	2	4	5	2	1	1
2	2	2	2	2	0	0	2014	31.6153	643839	2	0	0	16	1	5	5	2	2	1
2	2	2	2	2	0	0	2014	31.6153	643839	2	1	0	16	1	5	5	2	1	1
1	2	2	1	2	1	1	2014	34.2703	643839	2	0	0	16	2	5	5	2	2	1
1	2	2	2	2	1	0	2014	29.0679	643839	2	0	0	17	2	6	5	2	1	1
2	2	2	2	2	0	0	2014	53.1264	643839	2	1	0	18	2	7	5	2	2	1
2	2	1	2	2	1	0	2014	32.1606	643839	2	0	0	14	2	4	5	2	2	1
2	2	2	2	2	0	0	2014	37.3695	643839	2	0	0	18	2	6	3	2	2	1
2	2	2	2	2	0	0	2014	32.1606	643839	2	1	1	15	2	4	5	2	1	1
1	2	1	2	2	1	0	2014	34.2703	643839	2	1	0	16	2	5	5	2	1	1
2	2	2	2	2	0	0	2014	41.3454	643839	2	0	0	16	2	4	3	2	2	1
2	2	2	2	2	0	0	2014	32.1606	643839	2	0	0	14	2	4	5	2	2	1
2	2	2	2	2	0	0	2014	38.1424	643839	2	0	0	15	1	4	3	2	2	1
2	2	2	2	2	0	0	2014	34.2703	643839	2	0	0	15	2	5	5	2	2	1
2	2	1	2	2	1	0	2014	29.6691	643839	2	0	0	14	1	4	5	2	2	1
1	2	2	1	2	1	1	2014	29.6691	643839	2	0	0	14	1	4	5	2	2	1
2	2	2	2	2	0	0	2014	28.8973	643839	2	1	0	16	2	4	5	1	1	1
1	2	2	2	2	1	0	2014	31.6153	643839	2	0	0	15	1	5	6	2	2	1
2	2	2	2	2	0	0	2014	29.6691	643839	2	0	0	14	1	4	5	2	2	1
2	2	2	2	2	0	0	2014	29.6691	643839	2	0	0	15	1	4	5	2	2	1
2	2	2	2	2	0	0	2014	29.6691	643839	2	0	0	14	1	4	5	2	2	1
2	2	2	2	2	0	0	2014	32.1606	643839	2	0	0	14	2	4	5	2	2	1
1	2	2	2	2	1	0	2014	38.1424	643839	2	0	0	14	1	4	3	2	2	1
2	2	2	2	2	0	0	2014	49.0107	646881	2	0	0	18	1	7	5	2	2	1
2	2	2	2	2	0	0	2014	68.2989	646881	2	0	0	17	2	7	3	2	2	1
2	2	2	2	2	0	0	2014	53.1264	646881	2	0	0	17	2	7	5	2	2	1
1	1	2	2	2	1	0	2014	29.0679	646881	2	0	0	17	2	6	5	2	2	1
1	2	2	2	2	1	0	2014	34.2703	643839	2		0	15	2	5	5	2	2	1
2	2	2	2	2	0	0	2014	31.6153	643839	2	1	0	16	1	5	5	2	1	1
2	2	2	2	2	0	0	2014	49.0107	643839	2	0	0	18	1	7	5	2	2	1
2	2	2	2	2	0	0	2014	34.2703	643839	2	0	0	16	2	5	5	2	2	1
2	2	2	2	2	0	0	2014	31.6153	643839	2	0	0	16	1	5	5	2	2	1
2	2	2	2	2	0	0	2014	31.6153	643839	2	0	0	16	1	5	5	2	2	1
[truncated: 168,158 more rows]
